# Supplementary material
Source: PubMed Central journal article supplement (PMC7551235)
Supplement: jamainternmed-e204748-s001.pdf [file jamainternmed-e204748-s001.pdf]

## Supplementary Online Content

Gaudino M, Hameed I, Farkouh ME, et al. Overall and cause-specific mortality in randomized clinical trials comparing percutaneous interventions with coronary bypass surgery: a meta-analysis.

Published online October 12, 2020. *JAMA Intern Med*. doi:10.1001/jamainternmed.2020.4748

**eTable 1.** Full Search Strategy

**eTable 2.** Summary of the Included Randomized Clinical Trials

**eTable 3.** Details of Patient Characteristics

**eTable 4.** Procedural Characteristics

**eTable 5.** Details of Medical Therapy

**eTable 6.** Details of Trial End Points

**eTable 7.** Adjudication of Cause of Death in the Randomized Clinical Trials

**eTable 8.** Details of Noncardiac Mortality in Percutaneous Coronary Intervention (PCI) vs Coronary Artery Bypass Grafting (CABG) Randomized Clinical Trials

**eFigure 1.** Preferred Reporting Items for Systematic Reviews and Meta-Analyses (PRISMA) Flowchart of Our Analysis

**eFigure 2.** Funnel Plot for Studies Reporting All-Cause Mortality

**eFigure 3.** Funnel Plot for Studies Reporting Cardiac Mortality

**eFigure 4.** Funnel Plot for Studies Reporting Noncardiac Mortality

**eFigure 5.** Leave-One-Out Analysis for All-Cause Mortality for Fixed-Effects Model (A) and Random-Effects Model

**eFigure 6.** Leave-One-Out Analysis for Cardiac Mortality for Fixed-Effects Model (A) and Random-Effects Model (B)

**eFigure 7.** Leave-One-Out Analysis for Noncardiac Mortality for Fixed-Effects Model (A) and Random-Effects Model (B)

**eFigure 8.** Subgroup Analysis for All-Cause Mortality for Trials Including Patients With Left Main Disease vs Non-Left Main Disease

**eFigure 9.** Subgroup Analysis for Cardiac Mortality for Trials Including Patients With Left Main Disease vs Non-Left Main Disease

**eFigure 10.** Subgroup Analysis for Noncardiac Mortality for Trials Including Patients With Left Main Disease vs Non-Left Main Disease

**eMethods.** The Cochrane Risk-of-Bias Tool for Randomized Trials (RoB 2)

**eReferences.**

This supplementary material has been provided by the authors to give readers additional information about their work.

## eTable 1. Full Search Strategy

Ovid MEDLINE® ALL - 1946 to November 21, 2019

Searched on November 24, 2019

Limited to RCTs via BMJ's study design search filter available from:

<https://bestpractice.bmj.com/info/toolkit/learn-ebm/study-design-search-filters/>

Line # | Search

- 1 Percutaneous Coronary Intervention/  
2 (percutaneous coronary intervention\* or percutaneous coronary revascularization\* or PCI or  
percutaneous coronary angioplasty or stent or stents or stenting).tw.
- 3 Angioplasty, Balloon, Coronary/  
4 (coronary balloon angioplasties or coronary balloon angioplasty or transluminal coronary balloon  
dilation or coronary artery balloon dilation or percutaneous transluminal coronary angioplasty or  
coronary angioplasty or coronary angioplasties or PTCA).tw.
- 5 or/1-4
- 6 Coronary Artery Bypass/  
7 (coronary adj2 (bypass or graft)).tw.  
8 (CABG or aorticocoronary anastomosis or total arterial revascularization or total arterial  
revascularisation or Multiple arterial revascularization or multiple arterial revascularisation).tw.
- 9 Coronary Artery Bypass, Off-Pump/  
10 Internal Mammary-Coronary Artery Anastomosis/  
11 ((Right Internal Mammary Artery or RIMA or Coronary Internal Mammary Artery or arteria mammaria  
interna or arteria thoracica interna or internal thoracic artery or mammary internal artery) and  
(transplant\* or graft\* or anastomosis)).tw.
- 12 (surgical revascularization or cardiac muscle revascularisation or cardiac muscle revascularization or  
coronary revascularisation or coronary revascularization or heart muscle revascularisation or heart  
myocardium revascularisation or heart revascularisation or heart revascularization or internal mammary  
arterial anastomosis or internal mammary arterial implantation or internal mammary artery  
anastomosis or internal mammary artery graft or internal mammary artery implant or internal  
mammary artery implantation or internal mammary-coronary artery anastomosis or myocardial  
revascularisation or myocardial revascularization or myocardium revascularisation or myocardium  
revascularization or transmyocardial laser revascularisation or transmyocardial laser revascularization or  
vineberg operation).tw.
- 13 or/6-12
- 14 "randomized controlled trial".pt.  
15 (random\$ or placebo\$ or single blind\$ or double blind\$ or triple blind\$).ti,ab  
16 (retraction of publication or retracted publication).pt.
- 17 or/14-16
- 18 (animals not humans).sh.  
19 ((comment or editorial or meta-analysis or practice-guideline or review or letter) not "randomized  
controlled trial").pt.
- 20 (random sampl\$ or random digit\$ or random effect\$ or random survey or random regression).ti,ab. not  
"randomized controlled trial".pt.

21 17 not (18 or 19 or 20)

22 5 and 13

23 22 and 21

**eTable 2.** Summary of the Included Randomized Clinical Trials

| Trial                                | Number of centers | Location                                   | Study period | Number of patients randomized | Mean follow-up (years) |
|--------------------------------------|-------------------|--------------------------------------------|--------------|-------------------------------|------------------------|
| ARTS <sup>1</sup>                    | 67                | Europe                                     | 1997-1998    | 1205 (PCI: 600, CABG: 605)    | 5                      |
| BEST <sup>2</sup>                    | 27                | Asia                                       | 2008-2013    | 880 (PCI: 438, CABG: 442)     | 4.6                    |
| Blazek et al <sup>3</sup>            | 1                 | Germany                                    | 1997-2001    | 220 (PCI: 110, CABG: 110)     | 10.3                   |
| Boudriot et al <sup>4</sup>          | 4                 | Germany                                    | 2003-2009    | 201 (PCI: 100, CABG: 101)     | 1                      |
| CARDia <sup>5</sup>                  | 24                | United Kingdom, Ireland                    | 2002-2007    | 510 (PCI: 256, CABG: 254)     | 2                      |
| Cisowski et al <sup>6</sup>          | 1                 | Poland                                     | 2000-2001    | 100 (PCI: 50, CABG: 50)       | 1                      |
| Drenth et al <sup>7</sup>            | 1                 | Netherlands                                | 1997-1999    | 102 (PCI: 51, CABG: 51)       | 4                      |
| ERACI II <sup>8</sup>                | 7                 | North America, Europe, South America       | 1996-1998    | 450 (PCI: 225, CABG: 225)     | 5                      |
| EXCEL <sup>9</sup>                   | 126               | Europe, North America, Asia, South America | 2010-2014    | 1905 (PCI: 948, CABG: 957)    | 5                      |
| FREEDOM <sup>10</sup>                | 140               | United States                              | 2005-2010    | 1900 (PCI: 953, CABG: 947)    | 3.8, 7.5               |
| Hong et al <sup>11</sup>             | 1                 | South Korea                                | 2003         | 189 (PCI: 119, CABG: 70)      | 0.5                    |
| Kim et al <sup>12</sup>              | 1                 | South Korea                                | 2000-2001    | 100 (PCI: 50, CABG: 50)       | 1                      |
| LE MANS <sup>13</sup>                | 3                 | Poland                                     | 2001-2004    | 105 (PCI: 52, CABG: 53)       | 9.8                    |
| MASS-II <sup>14</sup>                | 1                 | Brazil                                     | 1995-2000    | 408 (PCI: 205, CABG: 203)     | 11.4                   |
| Myoprotect <sup>15</sup>             | 1                 | Germany                                    | 1998-2001    | 44 (PCI: 23, CABG: 21)        | 1                      |
| NOBLE <sup>16</sup>                  | 36                | Europe                                     | 2008-2015    | 1184 (PCI: 592, CABG: 592)    | 4.9                    |
| Octostent <sup>17</sup>              | 3                 | Netherlands                                | 1998-2000    | 280 (PCI: 138, CABG: 142)     | 1                      |
| PRECOMBAT <sup>18</sup>              | 13                | Korea                                      | 2004-2009    | 600 (PCI: 300, CABG: 300)     | 5                      |
| Stent or Surgery (SoS) <sup>19</sup> | 53                | Europe, Canada                             | 1996-1999    | 988 (PCI: 488, CABG: 500)     | 2                      |
| SIMA <sup>20</sup>                   | 6                 | Europe                                     | -            | 121 (PCI: 62, CABG: 59)       | 10                     |
| SYNTAX <sup>21,22</sup>              | 85                | Europe, United States                      | 2005-2007    | 1800 (PCI: 903, CABG: 897)    | 5, 10                  |
| Thiele et al <sup>23</sup>           | 1                 | Germany                                    | 2003-2007    | 130 (PCI: 65, CABG: 65)       | 3.6                    |
| VA CARDS <sup>24</sup>               | 22                | United States                              | 2006-2010    | 198 (PCI: 101, CABG: 97)      | 2                      |

**eTable 3.** Details of Patient Characteristics

| Trial                        | Treatment | Age, mean (SD), median [IQR] | Female (%) | BMI (SD) [IQR]   | Smoking (%) | DM (%) | Insulin (%) | CAD, family history (%) | Statin (%) | HTN (%) | HC L/HL D (%) | PVD (%) | Carotid artery disease (%) | Prior Stroke (%) | Prior MI (%) | Prior TIA (%) | Prior CHF (%) | Prior PCI (%) | Prior CABG (%) | LVEF (SD) [IQR]  | SA (%) | UA (%) | ACS (%) |
|------------------------------|-----------|------------------------------|------------|------------------|-------------|--------|-------------|-------------------------|------------|---------|---------------|---------|----------------------------|------------------|--------------|---------------|---------------|---------------|----------------|------------------|--------|--------|---------|
| ARTS <sup>1</sup>            | PCI       | 61 (10)                      | 23         | 27.2 (3.7)       | 28          | 19     | -           | 39                      | -          | 45      | 58            | 6       | -                          | -                | 44           | -             | -             | -             | -              | -                | 57     | 37     | -       |
|                              | CABG      | 61 (9)                       | 24         | 27.4 (3.7)       | 26          | 16     | -           | 42                      | -          | 45      | 58            | 5       | -                          | -                | 42           | -             | -             | -             | -              | -                | 60     | 35     | -       |
| BEST <sup>2</sup>            | PCI       | 64.0 (9.3)                   | 30.6       | 24.7 (2.9)       | 20.1        | 40.4   | 4.6         | -                       | -          | 67.6    | 54.6          | 3.4     | -                          | 8.4              | 5.7          | -             | 3.7           | 6.8           | -              | 59.1 (8.5)       | 47.9   | 42.1   | -       |
|                              | CABG      | 64.9 (9.4)                   | 26.5       | 25.0 (2.9)       | 20.1        | 42.1   | 4.1         | -                       | -          | 66.7    | 50.2          | 2.7     | -                          | 7.5              | 6.6          | -             | 2.7           | 8.6           | -              | 59.9 (8.1)       | 46.2   | 45.0   | -       |
| Blazek et al <sup>3</sup>    | PCI       | 62.5 (10.2)                  | 28         | 28.2 (3.8)       | 25          | 34     | -           | 18                      | -          | 72      | 70            | -       | -                          | -                | 45           | -             | -             | 0             | 0              | 62 (15)          | -      | -      | -       |
|                              | CABG      | 61.6 (10.0)                  | 15         | 27.2 (3.4)       | 25          | 25     | -           | 17                      | -          | 71      | 73            | -       | -                          | -                | 45           | -             | -             | 0             | 0              | 63 (11)          | -      | -      | -       |
| Boudriot et al. <sup>4</sup> | PCI       | 66 [62-73]                   | 28         | 27.2 [24.6-31.5] | -           | 40     | -           | -                       | -          | 82      | 68            | -       | -                          | 3                | 19           | -             | -             | -             | -              | 65.0 [55.0-70.0] | -      | -      | -       |
|                              | CABG      | 69 [63-73]                   | 22         | 27.0 [24.9-30.1] | -           | 33     | -           | -                       | -          | 82      | 64            | -       | -                          | 6                | 14           | -             | -             | -             | -              | 65.0 [55.0-68.0] | -      | -      | -       |
| CARDia <sup>5</sup>          | PCI       | 64.3 (8.5)                   | 29.3       | 29.2 (4.9)       | 29.3        | 100    | 36.5        | -                       | -          | 76.6    | 92.9          | 2.4     | -                          | -                | -            | -             | -             | -             | -              | -                | -      | -      | -       |
|                              | CABG      | 63.6 (9.1)                   | 22.1       | 29.4 (5.3)       | 29.1        | 100    | 39.1        | -                       | -          | 80.6    | 87.3          | 5.2     | -                          | -                | -            | -             | -             | -             | -              | -                | -      | -      | -       |
| Cisowski et al <sup>6</sup>  | PCI       | 53.3 (10.2)                  | 16         | -                | 52          | 8      | -           | 40                      | -          | 52      | 78            | -       | -                          | -                | -            | -             | -             | 0             | 0              | -                | -      | -      | -       |
|                              | CABG      | 54.1 (9.1)                   | 18         | -                | 48          | 6      | -           | 44                      | -          | 56      | 76            | -       | -                          | -                | -            | -             | -             | 0             | 0              | -                | -      | -      | -       |
| Drenth et al <sup>7</sup>    | PCI       | 61 (1.3)                     | 25         | -                | 58          | 18     | -           | 50                      | -          | 33      | 45            | -       | -                          | 0                | 18           | -             | -             | 0             | 0              | -                | -      | -      | -       |
|                              | CABG      | 60 (1.6)                     | 22         | -                | 62          | 8      | -           | 46                      | -          | 16      | 41            | -       | -                          | 0                | 24           | -             | -             | 0             | 0              | -                | -      | -      | -       |
| ERACI II <sup>8</sup>        | PCI       | 62.5 (11.5)                  | 22.7       | 28.8% above 30   | 54.3        | 17.3   | -           | -                       | -          | 71.0    | 62.5          | 19.1    | -                          | -                | 28.5         | -             | -             | -             | -              | -                | -      | 92.1   | -       |
|                              | CABG      | 61.4 (10.1)                  | 18.6       | 32.5% above 30   | 49.5        | 17.3   | -           | -                       | -          | 70.5    | 60.2          | 26.6    | -                          | -                | 27.7         | -             | -             | -             | -              | -                | -      | 90.7   | -       |

|                                      |      |             |      |            |      |      |      |      |      |      |      |      |   |     |      |     |     |      |     |             |     |      |      |
|--------------------------------------|------|-------------|------|------------|------|------|------|------|------|------|------|------|---|-----|------|-----|-----|------|-----|-------------|-----|------|------|
| EXCEL <sup>9</sup>                   | PCI  | 66.0 (9.6)  | 23.8 | 28.6 (5.0) | 23.4 | 30.2 | 7.7  | -    | -    | 74.2 | 70.5 | 10.2 | - | -   | 17.8 | 5.5 | 7.1 | 18.4 | 0   | 57.0 (9.6)  | 5.2 | 24.1 | -    |
|                                      | CABG | 65.9 (9.5)  | 22.5 | 28.8 (4.9) | 20.2 | 28.0 | 7.7  | -    | -    | 73.2 | 68.1 | 8.8  | - | -   | 16.8 | 7.0 | 6.2 | 15.9 | 0   | 57.3 (9.0)  | 5.2 | 24.5 | -    |
| FREEDOM <sup>10</sup>                | PCI  | 63.2 (8.9)  | 26.8 | 29.6 (5.4) | 14.8 | 10.0 | 33.8 | -    | 82.1 | 84.6 | -    | -    | - | 3.9 | 26.2 | -   | -   | -    | -   | 65.7 (12.1) | -   | -    | 31.9 |
|                                      | CABG | 63.1 (9.2)  | 30.5 | 29.8 (5.3) | 16.6 | 10.0 | 30.9 | -    | 82.6 | 85.1 | -    | -    | - | 3.0 | 25.0 | -   | -   | -    | -   | 66.6 (10.5) | -   | -    | 29.5 |
| Hong et al <sup>11</sup>             | PCI  | 60.5 (9.6)  | 36.1 | 25.5 (2.9) | 40.3 | 37.0 | -    | 9.3  | -    | 50.4 | 54.6 | -    | - | 2.5 | 21.8 | -   | -   | 0    | 0   | 52.8 (8.8)  | -   | 50.4 | -    |
|                                      | CABG | 61.4 (9.9)  | 35.7 | 26.6 (3.9) | 45.7 | 48.6 | -    | 10.0 | -    | 55.7 | 51.4 | -    | - | 2.9 | 22.9 | -   | -   | 0    | 0   | 51.9 (9.1)  | -   | 42.9 | -    |
| Kim et al <sup>12</sup>              | PCI  | 61 (12)     | 40   | -          | 45   | 20   | -    | -    | -    | 55   | 60   | -    | - | 2   | 22   | -   | 0   | 0    | 0   | 51 (11)     | -   | 65   | -    |
|                                      | CABG | 63 (12)     | 30   | -          | 55   | 15   | -    | -    | -    | 55   | 70   | -    | - | 2   | 22   | -   | 0   | 0    | 0   | 49 (13)     | -   | 55   | -    |
| LE MANS <sup>13</sup>                | PCI  | 60.6 (10.5) | 40   | -          | -    | 19   | -    | -    | -    | 75   | 65   | -    | - | -   | 36   | -   | -   | -    | -   | 53.5 (10.7) | -   | -    | -    |
|                                      | CABG | 61.3 (8.4)  | 27   | -          | -    | 17   | -    | -    | -    | 70   | 60   | -    | - | -   | 32   | -   | -   | -    | -   | 53.7 (6.7)  | -   | -    | -    |
| MASS-II <sup>14</sup>                | PCI  | 60 (9)      | 33.0 | -          | 27   | 23   | -    | -    | -    | 61   | -    | -    | - | -   | 52   | -   | -   | -    | -   | 67 (8)      | 7.8 | -    | -    |
|                                      | CABG | 60 (9)      | 28.0 | -          | 32   | 29   | -    | -    | -    | 63   | -    | -    | - | -   | 41   | -   | -   | -    | -   | 67 (9)      | 8.6 | -    | -    |
| Myoprotec <sup>t</sup> <sup>15</sup> | PCI  | 69 (8)      | 17   | -          | -    | 39   | -    | -    | 22   | 96   | -    | -    | - | -   | -    | -   | -   | -    | -   | 52          | 7.8 | -    | -    |
|                                      | CABG | 71 (7)      | 43   | -          | -    | 38   | -    | -    | 48   | 86   | -    | -    | - | -   | -    | -   | -   | -    | -   | 56          | 5.7 | -    | -    |
| NOBLE <sup>16</sup>                  | PCI  | 66.2 (9.9)  | 20.0 | 27.9 (4.5) | 19   | 15   | -    | 58   | 82   | 65.2 | -    | -    | - | -   | -    | -   | -   | 19.6 | 0.7 | 60 [55-65]  | 8.2 | -    | 17.9 |
|                                      | CABG | 66.2 (9.4)  | 24.0 | 28.1 (4.4) | 22   | 15   | -    | 56   | 78   | 65.7 | -    | -    | - | -   | -    | -   | -   | 19.9 | 0.3 | 60 [52-64]  | 8.2 | -    | 16.9 |
| Octostent <sup>17</sup>              | PCI  | 60.3 (9.1)  | 30   | -          | 25   | 9    | -    | 60   | -    | 33   | 59   | 7    | - | 1   | 25   | -   | -   | 4    | -   | -           | -   | 30   | -    |
|                                      | CABG | 58.9 (10.0) | 28   | -          | 19   | 14   | -    | 62   | -    | 31   | 60   | 7    | - | 2   | 23   | -   | -   | 5    | -   | -           | -   | 34   | -    |
| PRECOMB AT <sup>18</sup>             | PCI  | 61.8 (10.0) | 24.0 | 24.6 (2.7) | -    | 34   | 3.3  | -    | -    | 54.3 | 42.3 | 5.0  | - | -   | 3.4  | -   | 0.0 | 12.7 | -   | 61.7 (8.3)  | 5.3 | 42.3 | -    |
|                                      | CABG | 62.7 (9.5)  | 23.0 | 24.5 (3.0) | -    | 30   | 3.0  | -    | -    | 51.3 | 40.0 | 2.3  | - | -   | 6.7  | -   | 0.7 | 12.7 | -   | 60.6 (8.5)  | 4.5 | 48.0 | -    |

|                                      |      |            |      |            |      |      |      |    |   |      |      |      |     |     |      |     |     |      |     |            |      |      |   |
|--------------------------------------|------|------------|------|------------|------|------|------|----|---|------|------|------|-----|-----|------|-----|-----|------|-----|------------|------|------|---|
| Stent or Surgery (SoS) <sup>19</sup> | PCI  | 61 (9.2)   | 20.0 | -          | 16   | 13.9 | 4    | 48 | - | 43   | 53   | 6    | -   | 1   | 44   | 1   | -   | -    | -   | 57         | -    | 19   | - |
|                                      | CABG | 62 (9.8)   | 22.0 | -          | 14   | 14.8 | 2    | 48 | - | 47   | 50   | 7    | -   | 3   | 47   | 2   | -   | -    | -   | 57         | -    | 22   | - |
| SIMA <sup>20</sup>                   | PCI  | 59 (57-62) | 24   | -          | 57   | 11   | -    | 36 | - | 46   | 62   | -    | -   | 2   | 2    | -   | -   | -    | -   | 67 [65-69] |      |      |   |
|                                      | CABG | 60 (58-63) | 17   | -          | 50   | 13   | -    | 27 | - | 48   | 55   | -    | -   | 0   | 2    | -   | -   | -    | -   | 67 [65-70] |      |      |   |
| SYNTAX <sup>21,22</sup>              | PCI  | 65.2 (9.7) | 23.6 | 28.1 (4.8) | 18.5 | 25.6 | 24.6 | -  | - | 68.9 | 78.7 | -    | 8.1 | 3.9 | 31.9 | 4.3 | 4.0 | -    | -   | -          | 56.9 | 28.9 | - |
|                                      | CABG | 65.0 (9.8) | 21.1 | 27.9 (4.5) | 22.0 | 24.6 | 9.9  | -  | - | 64.0 | 77.2 | -    | 8.4 | 4.8 | 33.8 | 5.2 | 5.3 | -    | -   | -          | 57.2 | 28.0 | - |
| Thiele et al <sup>23</sup>           | PCI  | 66 (59-72) | 31   | 28.0 (3.7) | 14   | 28   | -    | -  | - | 83   | 55   | -    | -   | 3   | 23   | -   |     | 0    | 0   | 65 [60-66] | -    | -    | - |
|                                      | CABG | 66 (59-71) | 29   | 26.9 (4.0) | 18   | 25   | -    | -  | - | 85   | 55   | -    | -   | 9   | 23   | -   |     | 0    | 0   | 65 [60-70] | -    | -    | - |
| VA CARDS <sup>24</sup>               | PCI  | 62.7 (7.1) | 1.0  | 32.8 (5.7) | 27.7 | 100  | 47.9 | -  | - | 96.0 | -    | 10.9 | -   | 6.9 | -    | -   | -   | 34.7 | 3   | -          | -    | -    | - |
|                                      | CABG | 62.1 (7.4) | 1.0  | 33.0 (5.7) | 20.6 | 100  | 47.5 | -  | - | 95.7 | -    | 17.0 | -   | 8.5 | -    | -   | -   | 20.2 | 1.1 | -          | -    | -    | - |

| Trial                       | Treatment | Bifurcation (%) | Bifurcation or trifurcation of the distal left artery (%) | Diseased non-left main coronary arteries (0,1,2,3) (%) | NYHA Class I (%) | NYHA Class II (%) | NYHA Class III (%) | NYHA Class IV (%) | EuroSCORE (SD) [IQR] | SYNTAX score (SD) [IQR] |
|-----------------------------|-----------|-----------------|-----------------------------------------------------------|--------------------------------------------------------|------------------|-------------------|--------------------|-------------------|----------------------|-------------------------|
| ARTS <sup>1</sup>           | PCI       | 34              | -                                                         | (0,2,68,30)                                            | -                | -                 | -                  | -                 | -                    | -                       |
|                             | CABG      | 31              | -                                                         | (0,0,67,33)                                            | -                | -                 | -                  | -                 | -                    | -                       |
| BEST <sup>2</sup>           | PCI       | 57.5            | -                                                         | -                                                      | -                | -                 | -                  | -                 | 2.9 (2.0)            | 24.2 (7.5)              |
|                             | CABG      | 58.8            | -                                                         | -                                                      | -                | -                 | -                  | -                 | 3.0 (2.1)            | 24.6 (8.1)              |
| Blazek et al <sup>3</sup>   | PCI       | -               | -                                                         | -                                                      | -                | -                 | -                  | -                 | -                    | -                       |
|                             | CABG      | -               | -                                                         | -                                                      | -                | -                 | -                  | -                 | -                    | -                       |
| Boudriot et al <sup>4</sup> | PCI       | -               | -                                                         | (28,35,26,11)                                          | -                | -                 | -                  | -                 | -                    | 24.0 [19.0-29.0]        |
|                             | CABG      | -               | -                                                         | (29,27,28,17)                                          | -                | -                 | -                  | -                 | -                    | 23.0 [14.8-29.0]        |
| CARDia <sup>5</sup>         | PCI       | -               | -                                                         | -                                                      | -                | -                 | -                  | -                 | -                    | -                       |
|                             | CABG      | -               | -                                                         | -                                                      | -                | -                 | -                  | -                 | -                    | -                       |
| Cisowski et al <sup>6</sup> | PCI       | -               | -                                                         | -                                                      | -                | -                 | -                  | -                 | -                    | -                       |
|                             | CABG      | -               | -                                                         | -                                                      | -                | -                 | -                  | -                 | -                    | -                       |
| Drenth et al <sup>7</sup>   | PCI       | -               | -                                                         | -                                                      | -                | -                 | -                  | -                 | -                    | -                       |
|                             | CABG      | -               | -                                                         | -                                                      | -                | -                 | -                  | -                 | -                    | -                       |
| ERACI II <sup>8</sup>       | PCI       | -               | -                                                         | -                                                      | -                | -                 | -                  | -                 | -                    | -                       |
|                             | CABG      | -               | -                                                         | -                                                      | -                | -                 | -                  | -                 | -                    | -                       |

|                                      |      |      |      |                          |      |      |     |   |           |                                               |
|--------------------------------------|------|------|------|--------------------------|------|------|-----|---|-----------|-----------------------------------------------|
| EXCEL <sup>9</sup>                   | PCI  | -    | 81.3 | (17.2,30.8,34.3,17.)     | -    | -    | -   | - | -         | 32.2% (<22);<br>42.8% (23-32);<br>25.1% (>33) |
|                                      | CABG | -    | 77.4 | (17.5,30.5,30.8,19.0)    | -    | -    | -   | - | -         | 39.3% (<22);<br>37.3% (23-32);<br>23.4% (>33) |
| FREEDOM <sup>10</sup>                | PCI  | -    | -    | -                        | -    | -    | -   | - | 2.7 (2.4) | 26.2 (8.4)                                    |
|                                      | CABG | -    | -    | -                        | -    | -    | -   | - | 2.8 (2.5) | 26.1 (8.8)                                    |
| Hong et al <sup>11</sup>             | PCI  | -    | -    | -                        | -    | -    | -   | - | -         | -                                             |
|                                      | CABG | -    | -    | -                        | -    | -    | -   | - | -         | -                                             |
| Kim et al <sup>12</sup>              | PCI  | -    | -    | -                        | -    | -    | -   | - | -         | -                                             |
|                                      | CABG | -    | -    | -                        | -    | -    | -   | - | -         | -                                             |
| LE MANS <sup>13</sup>                | PCI  | -    | -    | (0,13,27,60)             | -    | -    | -   | - | 3.3 (2.3) | 25.2 (8.7)                                    |
|                                      | CABG | -    | -    | (0,6,19,75)              | -    | -    | -   | - | 3.5 (2.3) | 24.7 (6.8)                                    |
| MASS-II <sup>14</sup>                | PCI  | -    | -    | -                        | -    | -    | -   | - | -         | -                                             |
|                                      | CABG | -    | -    | -                        | -    | -    | -   | - | -         | -                                             |
| Myoprotect <sup>15</sup>             | PCI  | -    | -    | -                        | -    | -    | -   | - | -         | -                                             |
|                                      | CABG | -    | -    | -                        | -    | -    | -   | - | -         | -                                             |
| NOBLE <sup>16</sup>                  | PCI  | -    | -    | -                        | 53   | 29.6 | 13  | 5 | 2 [2-4]   | 22.5 (7.5)                                    |
|                                      | CABG | -    | -    | -                        | 43   | 33.0 | 17  | 7 | 2 [2-4]   | 22.4 (8.0)                                    |
| Octostent <sup>17</sup>              | PCI  | -    | -    | -                        | -    | -    | -   | - | -         | -                                             |
|                                      | CABG | -    | -    | -                        | -    | -    | -   | - | -         | -                                             |
| PRECOMBAT <sup>18</sup>              | PCI  | 66.7 | -    | (9.0,17.7, 33.7,40.7)    | -    | -    | -   | - | 2.6 (1.8) | 24.4 (9.4)                                    |
|                                      | CABG | 61.0 | -    | (11.3, 17.7, 30.0, 41.0) | -    | -    | -   | - | 2.8 (1.9) | 25.8 (10.5)                                   |
| Stent or Surgery (SoS) <sup>19</sup> | PCI  | -    | -    | -                        | -    | -    | -   | - | -         | -                                             |
|                                      | CABG | -    | -    | -                        | -    | -    | -   | - | -         | -                                             |
| SIMA <sup>20</sup>                   | PCI  | -    | -    | -                        | -    | -    | -   | - | -         | -                                             |
|                                      | CABG | -    | -    | -                        | -    | -    | -   | - | -         | -                                             |
| SYNTAX <sup>21,22</sup>              | PCI  | 72.4 | -    | -                        | -    | -    | -   | - | 3.8 (2.6) | 28.4 (11.5)                                   |
|                                      | CABG | 73.3 | -    | -                        | -    | -    | -   | - | 3.8 (2.7) | 29.1 (11.4)                                   |
| Thiele et al <sup>23</sup>           | PCI  | -    | -    | -                        | -    | -    | -   | - | -         | -                                             |
|                                      | CABG | -    | -    | -                        | -    | -    | -   | - | -         | -                                             |
| VA CARDS <sup>24</sup>               | PCI  | -    | -    | -                        | 5.0  | 22.8 | 8.9 | 0 | -         | 21.5 (8.9)                                    |
|                                      | CABG | -    | -    | -                        | 11.7 | 24.5 | 7.4 | 0 | -         | 22.7 (10.6)                                   |

ACS- Acute coronary syndrome; BMI- Body mass index; CABG- Coronary artery bypass grafting; CAD- Coronary artery disease; CHF- Chronic heart failure; DM- Diabetes mellitus; HTN- Hypertension; HCL- Hypercholesterolemia; HLD- Hyperlipidemia; MI- Myocardial infarction; ; NYHA- New York Heart Association PCI- Percutaneous coronary intervention; PVD- Peripheral vascular disease; SA- Stable angina pectoris; TIA- Transient ischemic attack; UA- Unstable angina

eTable 4. Procedural Characteristics

| Trial                       | Treatment | Aspirin (%) | Thienopyridine (%) | Ticagrelor (%) | GP Inhibitor | Statin (%) | Beta-blocker (%) | ACEI or ARB (%) | Calcium channel | No. of lesions (SD or IQR) | CR (%) | No. of stents (SD) [IQR] | DES use (%) | Type of stent | Total stent length, mm (SD) | Stent diameter, mm (SD) [IQR] | No. of non-LMCA stents (0,1,2, bifurcation) (%) | Bifurcation technique (1 stent, 2 stent) (%) | Intravascular ultrasound, any, pre- |
|-----------------------------|-----------|-------------|--------------------|----------------|--------------|------------|------------------|-----------------|-----------------|----------------------------|--------|--------------------------|-------------|---------------|-----------------------------|-------------------------------|-------------------------------------------------|----------------------------------------------|-------------------------------------|
| ARTS <sup>1</sup>           | PCI       | 100         | 100                | -              | -            | -          | -                | -               | -               | 2.8 (1.0)                  | -      | 2.6 (1.1)                | 0           | BMS           | 47.5 (21.8)                 | -                             | -                                               | -                                            | -                                   |
|                             | CABG      | 100         | 100                | -              | -            | -          | -                | -               | -               | 2.8 (1.0)                  | -      | -                        | -           | -             | -                           | -                             | -                                               | -                                            | -                                   |
| BEST <sup>2</sup>           | PCI       | 97.0        | 96.6               | -              | -            | 83.1       | 68.5             | 44.5            | 58.0            | -                          | 53.9   | 3.4 (1.4)                | 100         | DES           | 85.3 (38.2)                 | 3.1 (0.3)                     | -                                               | -                                            | (76.0,-,-)                          |
|                             | CABG      | 96.6        | 89.3               | -              | -            | 83.5       | 42.8             | 25.3            | 46.4            | -                          | 62.0   | -                        | -           | -             | -                           | -                             | -                                               | -                                            | -                                   |
| Blazek et al <sup>3</sup>   | PCI       | -           | -                  | -              | -            | -          | -                | -               | -               | -                          | -      | 1.2 (0.4)                | 0           | BMS           | 15.1 (4.3)                  | -                             | -                                               | -                                            | -                                   |
|                             | CABG      | -           | -                  | -              | -            | -          | -                | -               | -               | -                          | -      | -                        | -           | -             | -                           | -                             | -                                               | -                                            | -                                   |
| Boudriot et al <sup>4</sup> | PCI       | -           | -                  | -              | -            | 97         | 99               | 98              | -               | -                          | -      | -                        | 100         | DES           | -                           | -                             | -                                               | -                                            | -                                   |
|                             | CABG      | -           | -                  | -              | -            | 94         | 95               | 92              | -               | -                          | -      | -                        | -           | -             | -                           | -                             | -                                               | -                                            | -                                   |
| CARDia <sup>5</sup>         | PCI       | -           | -                  | -              | -            | -          | -                | -               | -               | 3.6                        | -      | -                        | 69          | BMS, DES      | 71                          | -                             | -                                               | -                                            | -                                   |
|                             | CABG      | -           | -                  | -              | -            | -          | -                | -               | -               | -                          | -      | -                        | -           | -             | -                           | -                             | -                                               | -                                            | -                                   |
| Cisowski et al <sup>6</sup> | PCI       | -           | -                  | -              | -            | -          | -                | -               | -               | -                          | -      | -                        | 0           | BMS           | -                           | -                             | -                                               | -                                            | -                                   |
|                             | CABG      | -           | -                  | -              | -            | -          | -                | -               | -               | -                          | -      | -                        | -           | -             | -                           | -                             | -                                               | -                                            | -                                   |
| Drenth et al <sup>7</sup>   | PCI       | -           | -                  | -              | -            | -          | -                | -               | -               | -                          | -      | -                        | 0           | BMS           | -                           | -                             | -                                               | -                                            | -                                   |
|                             | CABG      | -           | -                  | -              | -            | -          | -                | -               | -               | -                          | -      | -                        | -           | -             | -                           | -                             | -                                               | -                                            | -                                   |
| ERACI II <sup>8</sup>       | PCI       | -           | -                  | -              | -            | -          | -                | -               | -               | -                          | -      | -                        | 0           | BMS           | -                           | -                             | -                                               | -                                            | -                                   |
|                             | CABG      | -           | -                  | -              | -            | -          | -                | -               | -               | -                          | -      | -                        | -           | -             | -                           | -                             | -                                               | -                                            | -                                   |
| EXCEL <sup>9</sup>          | PCI       | 95.9        | 95.9               | 6.9            | -            | 94.7       | 81.8             | 55.7            | 5.8             | 1.9 (1.1)                  | -      | 2.4 (1.5)                | 100         | DES           | 49.1 (35.6)                 | -                             | -                                               | -                                            | (76.2,-,-)                          |
|                             | CABG      | 92.1        | 31.0               | 0.2            | -            | 88.0       | 88.1             | 40.1            | 6.8             | 2.6 (0.8)                  | -      | -                        | -           | -             | -                           | -                             | -                                               | -                                            | -                                   |
| FREEDOM <sup>10</sup>       | PCI       | 98.4        | 97.8               | -              | -            | 83.7       | 79.3             | 80.2            | 24.7            | 5.7 (2.2)                  | -      | 3.5 (1.4)                | 100         | DES           | 26.1 (14.2)                 | -                             | -                                               | -                                            | -                                   |
|                             | CABG      | 85.9        | 23.9               | -              | -            | 81.1       | 76.1             | 60.2            | 18.0            | 5.7 (2.2)                  | -      | -                        | -           | -             | -                           | -                             | -                                               | -                                            | -                                   |
| Hong et al <sup>11</sup>    | PCI       | -           | -                  | -              | -            | -          | -                | -               | -               | -                          | -      | 1.2 (0.2)                | 100         | DES           | 22.6 (4.8)                  | 2.9 (0.3)                     | -                                               | -                                            | -                                   |
|                             | CABG      | -           | -                  | -              | -            | -          | -                | -               | -               | -                          | -      | -                        | -           | -             | -                           | -                             | -                                               | -                                            | -                                   |
| Kim et al <sup>12</sup>     | PCI       | -           | -                  | -              | -            | -          | -                | -               | -               | -                          | -      | -                        | 0           | -             | 22 (11)                     | -                             | -                                               | -                                            | -                                   |
|                             | CABG      | -           | -                  | -              | -            | -          | -                | -               | -               | -                          | -      | -                        | -           | -             | -                           | -                             | -                                               | -                                            | -                                   |
| LE MANS <sup>13</sup>       | PCI       | -           | -                  | -              | -            | -          | -                | -               | -               | -                          | 79     | -                        | 35          | BMS, DES      | -                           | -                             | -                                               | -                                            | -                                   |
|                             | CABG      | -           | -                  | -              | -            | -          | -                | -               | -               | -                          | 89     | -                        | -           | -             | -                           | -                             | -                                               | -                                            | -                                   |
| MASS-II <sup>14</sup>       | PCI       | -           | -                  | -              | -            | -          | -                | -               | -               | -                          | 41     | 2.1 (0.7)                | 0           | BMS           | -                           | -                             | -                                               | -                                            | -                                   |
|                             | CABG      | -           | -                  | -              | -            | -          | -                | -               | -               | -                          | -      | -                        | -           | -             | -                           | -                             | -                                               | -                                            | -                                   |
| Myoprotect <sup>15</sup>    | PCI       | 91          | -                  | -              | -            | 39         | 70               | 43              | 0               | 1.48                       | -      | -                        | 0           | BMS           | 13.4 (4.0)                  | -                             | -                                               | -                                            | -                                   |



|                                      |      |      |      |     |      |      |      |      |      |           |      |           |      |             |             |               |                         |              |                 |
|--------------------------------------|------|------|------|-----|------|------|------|------|------|-----------|------|-----------|------|-------------|-------------|---------------|-------------------------|--------------|-----------------|
|                                      | CABG | 86   | -    | -   | -    | 10   | 33   | 67   | 14   | 1.5       | -    | -         | -    | -           | -           | -             | -                       | -            | -               |
| NOBLE <sup>16</sup>                  | PCI  | 91.0 | 95.6 | -   | 18.6 | -    | -    | -    | -    | 2 (1-3)   | 91.7 | -         | 100  | DES         | -           | 4.0 [4.0-4.5] | (52.7, 32.3, 9.3, 85.8) | (-, 29.7)    | (-, 45.6, 72.6) |
|                                      | CABG | -    | -    | -   | -    | -    | -    | -    | -    | 2 (2-3)   | -    | -         | -    | -           | -           | -             | -                       | -            | -               |
| Octostent <sup>17</sup>              | PCI  | -    | -    | -   | -    | -    | -    | -    | -    | -         | 1.4  | 0         | BMS  | 201. (10.2) | -           | -             | -                       | -            | -               |
|                                      | CABG | -    | -    | -   | -    | -    | -    | -    | -    | -         | -    | -         | -    | -           | -           | -             | -                       | -            | -               |
| PRECOMBAT <sup>18</sup>              | PCI  | 98.3 | 97.7 | -   | -    | 71.7 | 60.7 | 39.3 | 61.3 | -         | 68.3 | 2.7 (1.4) | 100  | DES         | 60.0 (24.1) | -             | -                       | (29.0, 32.3) | (83.3, -, -)    |
|                                      | CABG | 96.7 | 90.7 | -   | -    | 72.0 | 40.3 | 26.7 | 45.3 | -         | 70.3 | -         | -    | -           | -           | -             | -                       | -            | -               |
| Stent or Surgery (SoS) <sup>19</sup> | PCI  | -    | -    | -   | 8.2  | -    | -    | -    | -    | 2.7       | -    | 2 [2-3]   | 0    | BMS         | -           | -             | -                       | -            | -               |
|                                      | CABG | -    | -    | -   | -    | -    | -    | -    | -    | -         | -    | -         | -    | -           | -           | -             | -                       | -            | -               |
| SIMA <sup>20</sup>                   | PCI  | 90   | -    | -   | -    | -    | 56   | 2    | 33   | -         | -    | -         | -    | -           | -           | -             | -                       | -            | -               |
|                                      | CABG | 87   | -    | -   | -    | -    | 55   | 0    | 33   | -         | -    | -         | -    | -           | -           | -             | -                       | -            | -               |
| SYNTAX <sup>21,22</sup>              | PCI  | 96.3 | 96.8 | 1.9 | -    | 86.7 | 81.3 | 78.6 | 25.8 | 4.3 (1.8) | 61.3 | 4.6 (2.3) | 100  | DES         | 86.1 (47.9) | -             | -                       | -            | -               |
|                                      | CABG | 88.5 | 19.5 | 4.8 | -    | 74.5 | 78.6 | 68.4 | 18.4 | 4.4 (1.8) | 56.3 | -         | -    | -           | -           | -             | -                       | -            | -               |
| Thiele et al <sup>23</sup>           | PCI  | 100  | 100  | -   | -    | 99   | 99   | 100  | -    | -         | -    | -         | 95.4 | DES, BMS    | -           | -             | -                       | -            | -               |
|                                      | CABG | 100  | 34   | -   | -    | 97   | 97   | 97   | -    | -         | -    | -         | -    | -           | -           | -             | -                       | -            | -               |
| VA CARDS <sup>24</sup>               | PCI  | -    | -    | -   | -    | -    | -    | -    | -    | -         | -    | -         | 100  | DES         | -           | -             | -                       | -            | -               |
|                                      | CABG | -    | -    | -   | -    | -    | -    | -    | -    | -         | -    | -         | -    | -           | -           | -             | -                       | -            | -               |

| Trial                       | Treatment | LIMA (%) | BIMA (%) | OPCAB (%) | LIMA+ SV grafting (%) | No. of grafts, mean (SD) | No. of arterial grafts, mean (SD) | No. of venous grafts, mean (SD) | No. of grafts, (1,2,3,4,5) (%) | Ultrasound (epi-aortic or transesophageal-aortic, epi-aortic, transesophageal) |
|-----------------------------|-----------|----------|----------|-----------|-----------------------|--------------------------|-----------------------------------|---------------------------------|--------------------------------|--------------------------------------------------------------------------------|
| ARTS <sup>1</sup>           | PCI       | -        | -        | -         | -                     | -                        | -                                 | -                               | -                              | -                                                                              |
|                             | CABG      | 88.5     | -        | -         | -                     | 2.6 (1.0)                | -                                 | -                               | -                              | -                                                                              |
| BEST <sup>2</sup>           | PCI       | -        | -        | -         | -                     | -                        | -                                 | -                               | -                              | -                                                                              |
|                             | CABG      | 90.0     | -        | 58.4      | -                     | 3.1 (0.9)                | 2.1 (1.1)                         | 1.0 (0.8)                       | -                              | -                                                                              |
| Blazek et al <sup>3</sup>   | PCI       | -        | -        | -         | -                     | -                        | -                                 | -                               | -                              | -                                                                              |
|                             | CABG      | -        | -        | -         | -                     | -                        | -                                 | -                               | -                              | -                                                                              |
| Boudriot et al <sup>4</sup> | PCI       | -        | -        | -         | -                     | -                        | -                                 | -                               | -                              | -                                                                              |
|                             | CABG      | 99.0     | -        | -         | -                     | -                        | -                                 | -                               | -                              | -                                                                              |
| CARDia <sup>5</sup>         | PCI       | -        | -        | -         | -                     | -                        | -                                 | -                               | -                              | -                                                                              |
|                             | CABG      | 94       | -        | -         | -                     | 2.9                      | -                                 | -                               | -                              | -                                                                              |
| Cisowski et al <sup>6</sup> | PCI       | -        | -        | -         | -                     | -                        | -                                 | -                               | -                              | -                                                                              |
|                             | CABG      | -        | -        | -         | -                     | -                        | -                                 | -                               | -                              | -                                                                              |
| Drenth et al <sup>7</sup>   | PCI       | -        | -        | -         | -                     | -                        | -                                 | -                               | -                              | -                                                                              |
|                             | CABG      | -        | -        | -         | -                     | -                        | -                                 | -                               | -                              | -                                                                              |
| ERACI II <sup>8</sup>       | PCI       | -        | -        | -         | -                     | -                        | -                                 | -                               | -                              | -                                                                              |
|                             | CABG      | -        | -        | -         | -                     | -                        | -                                 | -                               | -                              | -                                                                              |
| EXCEL <sup>9</sup>          | PCI       | -        | -        | -         | -                     | -                        | -                                 | -                               | -                              | -                                                                              |
|                             | CABG      | 94.9     | 27.7     | 28.3      | -                     | 2.6 (0.8)                | 1.4 (0.6)                         | 1.2 (0.9)                       | -                              | (43.6, 12.6, 40.8)                                                             |

|                                      |      |      |      |      |      |           |           |           |                         |   |
|--------------------------------------|------|------|------|------|------|-----------|-----------|-----------|-------------------------|---|
| FREEDOM <sup>10</sup>                | PCI  | -    | -    | -    | -    | -         | -         | -         | -                       | - |
|                                      | CABG | 89.5 | -    | 17.4 | -    | 2.9 (0.8) | -         | -         | -                       | - |
| Hong et al <sup>11</sup>             | PCI  | -    | -    | -    | -    | -         | -         | -         | -                       | - |
|                                      | CABG | -    | -    | -    | -    | -         | -         | -         | -                       | - |
| Kim et al <sup>12</sup>              | PCI  | -    | -    | -    | -    | -         | -         | -         | -                       | - |
|                                      | CABG | -    | -    | -    | -    | -         | -         | -         | -                       | - |
| LE MANS <sup>13</sup>                | PCI  | 72%  | -    | -    | -    | -         | -         | -         | -                       | - |
|                                      | CABG | -    | -    | -    | -    | -         | -         | -         | -                       | - |
| MASS-II <sup>14</sup>                | PCI  | -    | -    | -    | -    | -         | -         | -         | -                       | - |
|                                      | CABG | -    | -    | -    | -    | 3.3 (0.8) | -         | -         | -                       | - |
| Myoprotect <sup>15</sup>             | PCI  | -    | -    | -    | -    | -         | -         | -         | -                       | - |
|                                      | CABG | -    | -    | -    | -    | -         | -         | -         | -                       | - |
| NOBLE <sup>16</sup>                  | PCI  | -    | -    | -    | -    | -         | -         | -         | -                       | - |
|                                      | PCI  | -    | -    | -    | -    | -         | -         | -         | -                       | - |
| Octostent <sup>17</sup>              | CABG | -    | -    | -    | -    | 1.2       | 1.2       | -         | -                       | - |
|                                      | CABG | 92.1 | 7.4  | 14.9 | 81.1 | -         | -         | -         | (3.9,49.7,37.2,4.2,0.5) | - |
| PRECOMBAT <sup>18</sup>              | PCI  | -    | -    | -    | -    | -         | -         | -         | -                       | - |
|                                      | CABG | 77.7 | -    | 51.7 | -    | 2.7 (0.9) | 2.1 (0.9) | 0.7 (0.8) | -                       | - |
| Stent or Surgery (SoS) <sup>19</sup> | PCI  | -    | -    | -    | -    | -         | -         | -         | -                       | - |
|                                      | CABG | 79   | 10.2 | -    | -    | 2.8       | -         | -         | -                       | - |
| SIMA <sup>20</sup>                   | PCI  | -    | -    | -    | -    | -         | -         | -         | -                       | - |
|                                      | CABG | 100  | 0    | -    | -    | -         | -         | -         | -                       | - |
| SYNTAX <sup>21,22</sup>              | PCI  | -    | -    | -    | -    | -         | -         | -         | -                       | - |
|                                      | CABG | -    | 24.1 | 14.3 | -    | 2.8 (0.7) | -         | -         | -                       | - |
| Thiele et al <sup>23</sup>           | PCI  | 98.5 | -    | 95.8 | -    | -         | -         | -         | -                       | - |
|                                      | CABG | -    | -    | -    | -    | -         | -         | -         | -                       | - |
| VA CARDS <sup>24</sup>               | PCI  | -    | -    | -    | -    | -         | -         | -         | -                       | - |
|                                      | CABG | -    | -    | -    | -    | -         | -         | -         | -                       | - |

ACEI- Angiotensin-converting enzyme inhibitor; ARB- Angiotensin II receptor blockers; BIMA- Bilateral internal mammary artery; BMS: Bare-metal stent; CR- Complete revascularization; DES- Drug-eluting stent; GP- Glycoprotein IIa IIb; LIMA- Left internal mammary artery; LMCA- Left main coronary artery; OPCAB- Off-pump coronary artery bypass grafting; SV- Saphenous vein

**eTable 5.** Details of Medical Therapy

| Trial             | Description of Medical Therapy                                                                                                                                                                                                                                                                                        |
|-------------------|-----------------------------------------------------------------------------------------------------------------------------------------------------------------------------------------------------------------------------------------------------------------------------------------------------------------------|
| ARTS <sup>1</sup> | Antianginal medication (PCI: 78.9%, CABG: 58.5%)                                                                                                                                                                                                                                                                      |
| BEST <sup>2</sup> | Aspirin (PCI: 78.2%, CABG: 76.1%)<br>Thienopyridine (PCI: 58.8%, CABG: 48.4%)<br>Any antiplatelet drug (PCI: 92.0%, CABG: 90.8%)<br>Beta-blocker (PCI: 50.0%, CABG: 37.0%)<br>Calcium-channel blocker (PCI: 55.2%, CABG: 37.0%)<br>ACE inhibitor or ARB (PCI: 34.5%, CABG: 21.7%)<br>Statin (PCI: 79.3%, CABG: 75.0%) |

|                             |                                                                                                                                                                                                                                                                                                                                                                                                                                                                                                                                                                                                                                                                                                                              |
|-----------------------------|------------------------------------------------------------------------------------------------------------------------------------------------------------------------------------------------------------------------------------------------------------------------------------------------------------------------------------------------------------------------------------------------------------------------------------------------------------------------------------------------------------------------------------------------------------------------------------------------------------------------------------------------------------------------------------------------------------------------------|
| Blazek et al <sup>3</sup>   | <ul style="list-style-type: none"> <li>• PCI: aspirin (100 mg/day, indefinitely); ticlopidine or clopidogrel (4 weeks, following a loading dose the day before the procedure)</li> <li>• CABG: aspirin (100 mg/day, indefinitely)</li> </ul> <p>Beta-blocker (PCI: 74%, CABG: 75%)<br/> ACE inhibitor/AT-1 antagonist: (PCI: 73%, CABG: 71%)<br/> Statin (PCI: 68%, CABG: 68%)<br/> Aspirin (PCI: 74%, CABG: 69%)<br/> Thienopyridines (PCI: 10%, CABG: 8%)<br/> Nitrates (PCI: 20%, CABG: 19%)<br/> Calcium antagonists (PCI: 22%, CABG: 15%)<br/> Antidiabetic medication (PCI: 21%, CABG: 18%)</p>                                                                                                                        |
| Boudriot et al <sup>4</sup> | <ul style="list-style-type: none"> <li>• PCI: antiplatelet therapy (&gt;100 mg/day, indefinitely); clopidogrel (75 mg/day, ≥12 months); Glycoprotein IIb/IIIa inhibitor use was left to the discretion of the operator.</li> <li>• CABG: aspirin (100 mg/day, indefinitely)</li> <li>• BOTH: other pharmacological treatments such as statins, angiotensin-converting enzyme inhibitors, and betablockers were recommended based on current practice in both treatment groups.</li> </ul> <p>At discharge<br/> Aspirin (PCI: 100%, CABG: 100%)<br/> Clopidogrel (PCI: 100, CABG: 32%)<br/> Beta-blocker (PCI: 99, CABG: 95%)<br/> ACE inhibitor/AT-1 antagonist (PCI: 98%, CABG: 92%)<br/> Statins (PCI: 97%, CABG: 94%)</p> |
| CARDia <sup>5</sup>         | <ul style="list-style-type: none"> <li>• Routine administration of abciximab and clopidogrel for 1 to 3 months after BMS placement or 12 months after DES placement.</li> </ul> <p>Aspirin (PCI: 83.4%, CABG: 87.2%)<br/> Clopidogrel (PCI: 54.4%, CABG: 10.3%)<br/> Aspirin and clopidogrel (PCI: 50.9%, CABG: 16.5%)<br/> Statins (PCI: 83.4%, CABG: 89.3%)<br/> ACE inhibitors: (PCI: 56.1%, CABG: 60.3%)<br/> Oral hypoglycemics (PCI: 65.5%, CABG: 61.1%)<br/> Insulin (PCI: 29.8%, CABG: 40.9%)</p>                                                                                                                                                                                                                    |
| Cisowski et al <sup>6</sup> | <ul style="list-style-type: none"> <li>• PCI: ticlopidine (4 weeks)</li> </ul>                                                                                                                                                                                                                                                                                                                                                                                                                                                                                                                                                                                                                                               |
| Drenth et al <sup>7</sup>   | <ul style="list-style-type: none"> <li>• PCI: aspirin (100 mg/day, indefinitely); ticlopidine (250 mg/day, 1 month); Glycoprotein IIb/IIIa inhibitor was not used.</li> <li>• CABG: (100 mg/day, indefinitely)</li> </ul>                                                                                                                                                                                                                                                                                                                                                                                                                                                                                                    |

|                          |                                                                                                                                                                                                                                                                                                                                                                                                                                                                                                                                                                                                                                                                                                                                                                            |
|--------------------------|----------------------------------------------------------------------------------------------------------------------------------------------------------------------------------------------------------------------------------------------------------------------------------------------------------------------------------------------------------------------------------------------------------------------------------------------------------------------------------------------------------------------------------------------------------------------------------------------------------------------------------------------------------------------------------------------------------------------------------------------------------------------------|
|                          | No Beta blocker/Calcium antagonist/Long-acting nitrate (PCI: 24%, CABG: 29%)<br>≥1 Beta-blocker/Calcium antagonist/Long-acting nitrate: (PCI: 41%, CABG: 65%)<br>≥2 Beta blocker/Calcium antagonist/Long-acting nitrate: (PCI: 35%, CABG: 6%)                                                                                                                                                                                                                                                                                                                                                                                                                                                                                                                              |
| ERACI II <sup>8</sup>    | Abciximab (PCI: 28.3%, CABG: 0.0%)                                                                                                                                                                                                                                                                                                                                                                                                                                                                                                                                                                                                                                                                                                                                         |
| EXCEL <sup>9</sup>       | Aspirin (PCI: 93.0%, CABG: 93.6%)<br>P2Y12 receptor inhibitor (PCI: 61.6%, CABG: 21.0%)<br>Clopidogrel or ticlopidine (PCI: 50.0%, CABG: 20.3%)<br>Clopidogrel (PCI: 50.0%, CABG: 20.2%)<br>Ticlopidine (PCI: 0.0%, CABG: 0.1%)<br>Prasugrel or ticagrelor (PCI: 11.6%, CABG: 0.8%)<br>Prasugrel (PCI: 8.5%, CABG: 0.4%)<br>Ticagrelor (PCI: 3.1%, CABG: 0.4%)<br>Beta-blockers (PCI: 86.6%, CABG: 94.3%)<br>Calcium channel blockers (PCI: 18.3%, CABG: 19.1%)<br>ACE inhibitors or receptor blockers (PCI: 66.7%, CABG: 59.4%)<br>Aldosterone antagonist: (PCI: 1.6%, CABG: 1.7%)<br>Diuretic: (PCI: 17.1%, CABG: 38.8%)<br>Anti-arrhythmic agent: (PCI: 3.1%, CABG: 17.4%)<br>Statins: (PCI: 97.5%, CABG: 96.2%)<br>Chronic oral anticoagulant (PCI: 5.2%, CABG: 10.8%) |
| FREEDOM <sup>10</sup>    | Aspirin (PCI: 95.3%, CABG: 95.4%)<br>Thienopyridine (PCI: 58.7%, CABG: 22.8%)<br>Warfarin (PCI: 1.4%, CABG: 1.7%)<br>Statin (PCI: 91.4%, CABG: 89.9%)<br>Beta blocker (PCI: 82.6%, 82.8%)<br>ACE inhibitor (PCI: 67.4%, 66.7%)<br>Angiotensin-II receptor antagonist (PCI: 31.6%, CABG: 29.4%)<br>Calcium-channel blocker (PCI: 28.4%, CABG: 24.8%)<br>H2-receptor blocker (PCI: 19.7%, CABG: 20.8%)                                                                                                                                                                                                                                                                                                                                                                       |
| Hong et al <sup>11</sup> | <ul style="list-style-type: none"> <li>• PCI: aspirin (indefinitely); clopidogrel or ticlopidine (6 months)</li> </ul>                                                                                                                                                                                                                                                                                                                                                                                                                                                                                                                                                                                                                                                     |
| Kim et al <sup>12</sup>  | <ul style="list-style-type: none"> <li>• PCI: aspirin (100 mg/day, indefinitely), ticlopidine (250 mg/day, indefinitely)</li> <li>• CABG: aspirin (100 mg/day, indefinitely)</li> </ul>                                                                                                                                                                                                                                                                                                                                                                                                                                                                                                                                                                                    |
| LE MANS <sup>13</sup>    | <ul style="list-style-type: none"> <li>• PCI: Acetylsalicylic acid and thienopyridine (clopidogrel or ticlopidine) was initiated at least 2 days before the procedure. Intravenous glycoprotein IIb/IIIa blockers were used at the operator's discretion only in procedures performed in patients with complex coronary lesions and unstable angina. Unfractionated heparin was used in standard doses.</li> <li>• CABG: Double antiplatelet treatment (≥12 months); other pharmacological treatments (e.g., statins, angiotensin-converting enzyme inhibitors, beta-blockers) were recommended based on current practice and were left to the discretion of a supervising physician.</li> </ul> <p>Acetylsalicylic acid (PCI: 84%, CABG: 85%)</p>                         |

|                                         |                                                                                                                                                                                                                                                                                                                                                                                                                                                                                                                                                                                                                                                                                                                                                                                                                                                                                                                                              |
|-----------------------------------------|----------------------------------------------------------------------------------------------------------------------------------------------------------------------------------------------------------------------------------------------------------------------------------------------------------------------------------------------------------------------------------------------------------------------------------------------------------------------------------------------------------------------------------------------------------------------------------------------------------------------------------------------------------------------------------------------------------------------------------------------------------------------------------------------------------------------------------------------------------------------------------------------------------------------------------------------|
|                                         | <p>Clopidogrel (PCI: 5%, CABG: 5%)<br/>         Angiotensin receptor blocker (PCI: 68%, CABG: 65%)<br/>         ACE inhibitor (PCI: 5%, CABG: 5%)<br/>         Beta-blocker (PCI: 84%, CABG: 80%)<br/>         Statin (PCI: 84%, CABG: 85%)</p>                                                                                                                                                                                                                                                                                                                                                                                                                                                                                                                                                                                                                                                                                              |
| MASS-II <sup>14</sup>                   | <ul style="list-style-type: none"> <li>All: optimal medical regimen of titrated nitrates, aspirin, beta-blockers, calcium channel blockers, angiotensin-converting enzyme inhibitors, or a combination of these drugs unless contraindicated.</li> <li>Lipid-lowering agents, particularly statins, were also prescribed, along with a low-fat diet, on an individual basis.</li> </ul> <p>Aspirin (PCI: 80%, CABG: 70%, Overall: 77%)<br/>         Long-acting nitrates (PCI: 41%, CABG: 12%, Overall: 42%)<br/>         Beta-blockers (PCI: 61%, CABG: 44%, Overall: 58%)<br/>         Calcium channel antagonists (PCI: 30%, CABG: 44%, Overall: 45%)<br/>         HMG-CoA reductase inhibitors (PCI: 73%, CABG: 49%, Overall: 63%)<br/>         ACE inhibitors (PCI: 30%, CABG: 21%, Overall: 27%)<br/>         Insulin (PCI: 9%, CABG: 11%, Overall: 11%)<br/>         Oral hypoglycemic agents (PCI: 14%, CABG: 35%, Overall: 37%)</p> |
| Myoprotect <sup>15</sup>                | None reported                                                                                                                                                                                                                                                                                                                                                                                                                                                                                                                                                                                                                                                                                                                                                                                                                                                                                                                                |
| NOBLE <sup>16</sup>                     | <ul style="list-style-type: none"> <li>All: aspirin (75–150 mg/day, indefinitely); clopidogrel (75 mg/day, 12 months if acute coronary syndrome is present)</li> <li>PCI: clopidogrel (75 mg/day, 12 months); prasugrel or ticagrelor could be substituted for clopidogrel at the discretion of the PCI operator.</li> </ul>                                                                                                                                                                                                                                                                                                                                                                                                                                                                                                                                                                                                                 |
| Octostent <sup>17</sup>                 | <ul style="list-style-type: none"> <li>PCI: glycoprotein IIb/IIIa receptor blocker was administered in 16 patients (12.2%).</li> </ul>                                                                                                                                                                                                                                                                                                                                                                                                                                                                                                                                                                                                                                                                                                                                                                                                       |
| PRECOMBAT <sup>18</sup>                 | <p>Beta-blocker (PCI: 55.3%, CABG: 44.0%)<br/>         Calcium channel-blocker (PCI: 61.7%, CABG: 46.3%)<br/>         ACE inhibitor (PCI: 15.1%, CABG: 9.2%)<br/>         Angiotensin II-receptor antagonist (PCI: 24.5%, CABG: 18.0%)<br/>         Statin: (PCI: 72.1%, CABG: 48.0%)</p>                                                                                                                                                                                                                                                                                                                                                                                                                                                                                                                                                                                                                                                    |
| Stent or Surgery (SoS)<br><sup>19</sup> | <p>Antianginal medications (number of drugs)</p> <p>0 (PCI: 18.5%, CABG: 35.1%)<br/>         1 (PCI: 44.4%, CABG: 44.2%)<br/>         2 (PCI: 28.9%, CABG: 18.3%)<br/>         3 (PCI: 7.9%, CABG: 2.2%)<br/>         4 (PCI: 0.2%, CABG: 0.0%)</p>                                                                                                                                                                                                                                                                                                                                                                                                                                                                                                                                                                                                                                                                                          |
| SIMA <sup>20</sup>                      | <p>Antiplatelet therapy (94% PCI and 96% CABG)<br/>         Lipid-lowering therapy increased gradually from 24% at 2 years to 89% (88% PCI and 91% CABG)<br/>         Beta-blockers, angiotensin-converting enzyme inhibitors, and calcium antagonists : more than 50% of the patients without differences between the 2 groups</p>                                                                                                                                                                                                                                                                                                                                                                                                                                                                                                                                                                                                          |
| SYNTAX <sup>21,22</sup>                 | <p>Acetylsalicylic acid (Aspirin) (PCI: 87.1%, CABG: 85.0%)<br/>         Thienopyridine (PCI: 32.0%, CABG: 12.1%)</p>                                                                                                                                                                                                                                                                                                                                                                                                                                                                                                                                                                                                                                                                                                                                                                                                                        |

|                            |                                                                                                                          |
|----------------------------|--------------------------------------------------------------------------------------------------------------------------|
|                            | Other antiplatelet (PCI: 4.1%, CABG: 3.3%)<br>Acetylsalicylic acid (Aspirin) and Antiplatelet (PCI: 27.4%, CABG: 9.1%)   |
| Thiele et al <sup>23</sup> | PCI: aspirin (100 mg/day, indefinitely); clopidogrel (75 mg/day, ≥12 months)<br>CABG: aspirin (100 mg/day, indefinitely) |
| VA CARDS <sup>24</sup>     | None reported                                                                                                            |

ACE: Angiotensin converting enzyme; CABG: coronary artery bypass grafting; PCI: percutaneous coronary intervention

**eTable 6.** Details of Trial End Points

| Trial                       | Primary outcomes                                                                                                                                                                                                                                                                                                                                             | Secondary outcomes                                                                                                                                                                                                                                                                                                    |
|-----------------------------|--------------------------------------------------------------------------------------------------------------------------------------------------------------------------------------------------------------------------------------------------------------------------------------------------------------------------------------------------------------|-----------------------------------------------------------------------------------------------------------------------------------------------------------------------------------------------------------------------------------------------------------------------------------------------------------------------|
| ARTS <sup>1</sup>           | freedom from major adverse cardiac and cerebrovascular events including all-cause mortality, transient ischemic attacks, myocardial infarction, repeat revascularization                                                                                                                                                                                     | angina status, use of medications, costs, cost effectiveness, and quality of life; a combined end point of mortality, myocardial infarction, or stroke; and the rates of mortality, myocardial infarction, stroke, and revascularization procedures.                                                                  |
| BEST <sup>2</sup>           | composite of all-cause mortality, myocardial infarction, or target-vessel revascularization                                                                                                                                                                                                                                                                  | safety composite of all-cause mortality, myocardial infarction, or stroke and a composite of mortality, myocardial infarction, stroke, or any repeat revascularization                                                                                                                                                |
| Blazek et al <sup>3</sup>   | freedom from major adverse cardiac events, defined as death from any cause, myocardial infarction, and the need for repeated target vessel revascularization                                                                                                                                                                                                 | individual component of the primary endpoint                                                                                                                                                                                                                                                                          |
| Boudriot et al <sup>4</sup> | all-cause mortality, myocardial infarction, and the need for repeat revascularization within twelve months                                                                                                                                                                                                                                                   | individual components of the composite end point                                                                                                                                                                                                                                                                      |
| CARDia <sup>5</sup>         | composite of all-cause mortality, myocardial infarction, and stroke                                                                                                                                                                                                                                                                                          | repeat revascularization                                                                                                                                                                                                                                                                                              |
| Cisowski et al <sup>6</sup> | all-cause mortality, myocardial infarction, and reoccurrence of angina pectoris (ie, a major adverse coronary event) that required hospital treatment and repeat revascularization of the target vessel                                                                                                                                                      |                                                                                                                                                                                                                                                                                                                       |
| Drenth et al <sup>7</sup>   | major adverse cardiac and cerebrovascular events, defined as cardiac death, myocardial infarction, stroke, and need for repeat target vessel revascularization                                                                                                                                                                                               | angina pectoris class and need for antianginal medication at four years of follow-up                                                                                                                                                                                                                                  |
| ERACI II <sup>8</sup>       | Composite of all-cause mortality, Q-wave myocardial infarction, stroke, and need for repeat revascularization procedures at 30 days, 1 year, 3 years, and 5 years of follow-up.                                                                                                                                                                              | angina status and functional class at one, three, and five years of follow-up; completeness of revascularization, determined by stress thallium at one month; and follow-up cost and cost-effectiveness of both technique                                                                                             |
| EXCEL <sup>9</sup>          | composite of all-cause mortality, stroke, myocardial infarction                                                                                                                                                                                                                                                                                              | primary outcome at 30 days and composite of all-cause mortality, stroke, myocardial infarction and repeat revascularization. The cause of mortality was adjudicated as definite cardiovascular, definite noncardiovascular, or undetermined, and undetermined cases were conservatively classified as cardiovascular. |
| FREEDOM <sup>10</sup>       | composite of all-cause mortality, nonfatal myocardial infarction, or nonfatal stroke                                                                                                                                                                                                                                                                         | major adverse cardiovascular and cerebrovascular events 30 days and 12 months after the procedure (including components of the primary outcome as well as repeat revascularization) and annual all-cause and cardiovascular mortality                                                                                 |
| Hong et al <sup>11</sup>    | cardiac death, myocardial infarction, and the need for repeated revascularization of the target vessel                                                                                                                                                                                                                                                       |                                                                                                                                                                                                                                                                                                                       |
| Kim et al <sup>11</sup>     | Major adverse cardiac events, all-cause mortality, percutaneous coronary intervention, coronary bypass, ST elevation myocardial infarction, non-ST elevation myocardial infarction, intraaortic balloon pump, pulmonary edema, bleeding complication, economic data like admission length, intensive care unit length of stay, post-operative length of stay | Mortality, cause of mortality and target vessel revascularization                                                                                                                                                                                                                                                     |
| LE MANS <sup>13</sup>       | left ventricular ejection fraction assessed by 2-dimensional echocardiography at 1 year                                                                                                                                                                                                                                                                      | all-cause mortality, myocardial infarction, target vessel revascularization, and stroke                                                                                                                                                                                                                               |
| MASS-II <sup>14</sup>       | all-cause mortality, Q-wave myocardial infarction, or refractory angina that required revascularization                                                                                                                                                                                                                                                      | angina status, mortality due to a cardiac cause, and a cerebrovascular accident                                                                                                                                                                                                                                       |
| Myoprotect <sup>15</sup>    | event-free survival including from causes like mortality, myocardial infarction, or need for target lesion revascularization at 1 year                                                                                                                                                                                                                       | quality-of-life evaluation and total treatment costs                                                                                                                                                                                                                                                                  |
| NOBLE <sup>16</sup>         | composite of all-cause mortality, non-procedural myocardial infarction, any repeat coronary revascularization                                                                                                                                                                                                                                                | individual components of the primary major adverse cardiac and cerebrovascular endpoint, definite stent thrombosis, and symptomatic graft occlusion                                                                                                                                                                   |

|                                      |                                                                                                                                                                                                   |                                                                                                                                                                  |
|--------------------------------------|---------------------------------------------------------------------------------------------------------------------------------------------------------------------------------------------------|------------------------------------------------------------------------------------------------------------------------------------------------------------------|
| Octostent <sup>17</sup>              | freedom from all-cause mortality, stroke, acute MI, and repeat revascularization at 12 months                                                                                                     | survival free of stroke and acute myocardial infarction, freedom from angina and medication, quality of life, and cost-effectiveness                             |
| PRECOMBAT <sup>18</sup>              | composite of all-cause mortality, myocardial infarction, stroke, ischemia driven revascularization                                                                                                | individual components of the primary endpoint; a composite of mortality, myocardial infarction, or stroke; and clinically driven target vessel revascularization |
| Stent or Surgery (SoS) <sup>19</sup> | repeat revascularization                                                                                                                                                                          | all-cause mortality                                                                                                                                              |
| SIMA <sup>20</sup>                   | all cause mortality, myocardial infarction, and the need for additional revascularization                                                                                                         | angina functional class                                                                                                                                          |
| SYNTAX <sup>21,22</sup>              | all-cause mortality, stroke, myocardial infarction, and repeat revascularization                                                                                                                  | major adverse cardiac and cerebrovascular event rates at different time intervals                                                                                |
| Thiele et al <sup>23</sup>           | freedom from major adverse cardiovascular events, which included cardiovascular mortality, myocardial infarction, and the need for repeated target vessel revascularization within twelve months. | each individual component of the composite end point and periprocedural adverse events occurring within thirty days after randomization                          |
| VA CARDS <sup>24</sup>               | composite of all-cause mortality or nonfatal myocardial infarction                                                                                                                                | all-cause mortality, cardiac mortality, nonfatal myocardial infarction, and stroke                                                                               |



**eTable 7.** Adjudication of Cause of Death in the Randomized Clinical Trials

| Trial                       | Adjudication process                                                                                                                                                                                                                                                                                                                                                                                                                                                      |
|-----------------------------|---------------------------------------------------------------------------------------------------------------------------------------------------------------------------------------------------------------------------------------------------------------------------------------------------------------------------------------------------------------------------------------------------------------------------------------------------------------------------|
| ARTS <sup>1</sup>           | An independent committee adjudicated clinical events and electrocardiograms.                                                                                                                                                                                                                                                                                                                                                                                              |
| BEST <sup>2</sup>           | All the clinical end points were assessed by the event-adjudication committee, whose members were unaware of the study-group assignments.                                                                                                                                                                                                                                                                                                                                 |
| Blazek et al <sup>3</sup>   | All events were adjudicated by an event monitoring committee consisting of an experienced cardiologist and cardiovascular surgeon.                                                                                                                                                                                                                                                                                                                                        |
| Boudriot et al <sup>4</sup> | All clinical outcomes were adjudicated by a clinical event committee consisting of a cardiothoracic surgeon and a cardiologist blinded to treatment allocation.                                                                                                                                                                                                                                                                                                           |
| CARDia <sup>5</sup>         | All major events including death, myocardial infarction, stroke, bleeding, and repeat revascularization were reviewed by the Critical Events Adjudication Committee, which consisted of cardiologists and surgeons who were blinded to treatment allocation. There were 2 adjudicators for each event, with a third used if required. An independent Data and Safety Monitoring Board comprising 2 cardiologists and 1 surgeon reviewed trial data according to protocol. |
| Cisowski et al <sup>6</sup> | The same committee consisting of cardiac surgeon and cardiologist, who were not involved into the study, assessed the angiograms.                                                                                                                                                                                                                                                                                                                                         |
| Drenth et al <sup>7</sup>   | Clinical events were checked by contact with the treating physicians and adjudicated by an event-monitoring committee of an experienced cardiologist and cardiac surgeon.                                                                                                                                                                                                                                                                                                 |
| ERACI II <sup>8</sup>       | The Clinical Events Committee reviewed the major adverse events and was blinded to the initial treatment strategy received.                                                                                                                                                                                                                                                                                                                                               |
| EXCEL <sup>9</sup>          | Trial monitors collected source documents of all primary and secondary outcome events for adjudication by an independent events committee.                                                                                                                                                                                                                                                                                                                                |
| FREEDOM <sup>10</sup>       | An events committee provided central independent adjudication of all occurrences of the primary end points in an unblinded fashion.                                                                                                                                                                                                                                                                                                                                       |
| Hong et al <sup>11</sup>    | None reported                                                                                                                                                                                                                                                                                                                                                                                                                                                             |
| Kim et al <sup>12</sup>     | None reported                                                                                                                                                                                                                                                                                                                                                                                                                                                             |
| LE MANS <sup>13</sup>       | All clinical outcomes were analyzed by the clinical events committee. Information on any adverse event (including cardiac and noncardiac death, myocardial infarction, stroke, or repeated revascularization) was confirmed with hospital discharge files where the adverse event took place and was analyzed by the Clinical Events Committee.                                                                                                                           |
| MASS-II <sup>14</sup>       | None reported                                                                                                                                                                                                                                                                                                                                                                                                                                                             |
| Myoprotect <sup>15</sup>    | None reported                                                                                                                                                                                                                                                                                                                                                                                                                                                             |

|                                      |                                                                                                                                                                                                                                                                                                                                                                                                                                                   |
|--------------------------------------|---------------------------------------------------------------------------------------------------------------------------------------------------------------------------------------------------------------------------------------------------------------------------------------------------------------------------------------------------------------------------------------------------------------------------------------------------|
| NOBLE <sup>16</sup>                  | An independent clinical events committee consisting of cardiologists and a cardiac surgeon adjudicated all possible events concerning cause of death, stroke, myocardial infarction, revascularisation, graft occlusion, and stent thrombosis                                                                                                                                                                                                     |
| Octostent <sup>17</sup>              | An independent committee blinded to the treatment allocation evaluated all events.                                                                                                                                                                                                                                                                                                                                                                |
| PRECOMBAT <sup>18</sup>              | The event adjudication committee, whose members were blind to the study group assignments, assessed all clinical endpoints.                                                                                                                                                                                                                                                                                                                       |
| Stent or Surgery (SoS) <sup>19</sup> | Deaths were reported by the clinical events committee.                                                                                                                                                                                                                                                                                                                                                                                            |
| SIMA <sup>20</sup>                   | None reported                                                                                                                                                                                                                                                                                                                                                                                                                                     |
| SYNTAX <sup>1,21</sup>               | An independent clinical events committee adjudicated all primary clinical events, and patient safety was assessed at prespecified intervals by an independent data monitoring committee. An independent clinical events committee (including cardiologists, cardiac surgeons, and a neurologist (list in the Supplementary Appendix) adjudicated all primary clinical end points, staged procedures, and cases in which the sternum was reopened. |
| Thiele et al <sup>23</sup>           | All clinical outcomes were adjudicated by a clinical event committee consisting of a cardiothoracic surgeon and a cardiologist.                                                                                                                                                                                                                                                                                                                   |
| VA CARDS <sup>24</sup>               | A data monitoring committee reviewed safety and outcome measures semiannually. A 3-member endpoint committee blinded to treatment assignment adjudicated all MIs and strokes. Where records related to a death in follow-up were available, the endpoint committee reviewed them to assign a presumed cardiac versus noncardiac cause.                                                                                                            |

**eTable 8.** Details of Noncardiac Mortality in Percutaneous Coronary Intervention (PCI) vs Coronary Artery Bypass Grafting (CABG) Randomized Clinical Trials

| Trial Name                           | PCI                                                                                                                                                                                               | CABG                                                                                                                                                                                            |
|--------------------------------------|---------------------------------------------------------------------------------------------------------------------------------------------------------------------------------------------------|-------------------------------------------------------------------------------------------------------------------------------------------------------------------------------------------------|
| ARTS <sup>1</sup>                    | Reported cardiac and non-cardiac deaths                                                                                                                                                           | Reported cardiac and non-cardiac deaths                                                                                                                                                         |
| BEST <sup>2</sup>                    | Reported "non-cardiac death" but did not specify cause                                                                                                                                            | Reported "non-cardiac death" but did not specify cause                                                                                                                                          |
| Blazek et al <sup>3</sup>            | Reported cardiac death from which non-cardiac death was calculated                                                                                                                                | Reported cardiac death from which non-cardiac death was calculated                                                                                                                              |
| Drenth et al <sup>7</sup>            | Reported cardiac and non-cardiac death                                                                                                                                                            | Reported cardiac and non-cardiac death                                                                                                                                                          |
| ERACI II <sup>8</sup>                | Four non-cardiac deaths were due to renal insufficiency, lung cancer, pulmonary emphysema, and mesenteric infarction                                                                              | Causes of non-cardiac deaths were pulmonary emphysema, stroke, renal insufficiency, and prostate and lung cancer                                                                                |
| EXCEL <sup>9</sup>                   | Pulmonary: 8<br>infection: 14<br>gastrointestinal: 1<br>malignancy: 29<br>accident/trauma:3<br>non-cardiovascular organ failure: 2<br>other non-cardiovascular cause: 0<br>undetermined cause: 16 | Pulmonary: 5<br>infection: 7<br>gastrointestinal: 2<br>malignancy: 23<br>accident/trauma:2<br>non-cardiovascular organ failure: 0<br>other non-cardiovascular cause: 2<br>undetermined cause: 9 |
| FREEDOM <sup>10</sup>                | Reported cardiac death from which non-cardiac death was calculated                                                                                                                                | Reported cardiac death from which non-cardiac death was calculated                                                                                                                              |
| Kim et al <sup>12</sup>              | cancer deaths: 1; CVA death: 1; unknown cause: 0                                                                                                                                                  | cancer deaths: 0; CVA death: 0; unknown cause: 1                                                                                                                                                |
| MASS-II <sup>14</sup>                | Reported cardiac death from which non-cardiac death was calculated                                                                                                                                | Reported cardiac death from which non-cardiac death was calculated                                                                                                                              |
| NOBLE <sup>16</sup>                  | Vascular death: 2<br>Reported cardiac and vascular death from which non-cardiac death was calculated                                                                                              | Vascular death: 1<br>Reported cardiac and vascular death from which non-cardiac death was calculated                                                                                            |
| PRECOMBAT <sup>18</sup>              | Reported "non-cardiac death" but did not specify cause                                                                                                                                            | Reported "non-cardiac death" but did not specify cause                                                                                                                                          |
| Octostent <sup>7</sup>               | Reported all-cause mortality, cardiovascular mortality and other mortality                                                                                                                        | Reported all-cause mortality, cardiovascular mortality and other mortality                                                                                                                      |
| Stent or Surgery (SoS) <sup>19</sup> | Other vascular: 2<br>cancer: 9<br>unknown: 2                                                                                                                                                      | Other vascular: 1<br>cancer: 3<br>unknown: 0                                                                                                                                                    |
| SIMA <sup>20</sup>                   | Reported all-cause, cardiac and non-cardiac mortality                                                                                                                                             | Reported all-cause, cardiac and non-cardiac mortality                                                                                                                                           |
| SYNTAX <sup>21,22</sup>              | Reported cardiac death from which non-cardiac death was calculated                                                                                                                                | Reported cardiac death from which non-cardiac death was calculated                                                                                                                              |
| VA CARDS <sup>24</sup>               | Reported cardiac death from which non-cardiac death was calculated                                                                                                                                | Reported cardiac death from which non-cardiac death was calculated                                                                                                                              |

**eFigure 1.** Preferred Reporting Items for Systematic Reviews and Meta-Analyses (PRISMA) Flowchart of Our Analysis

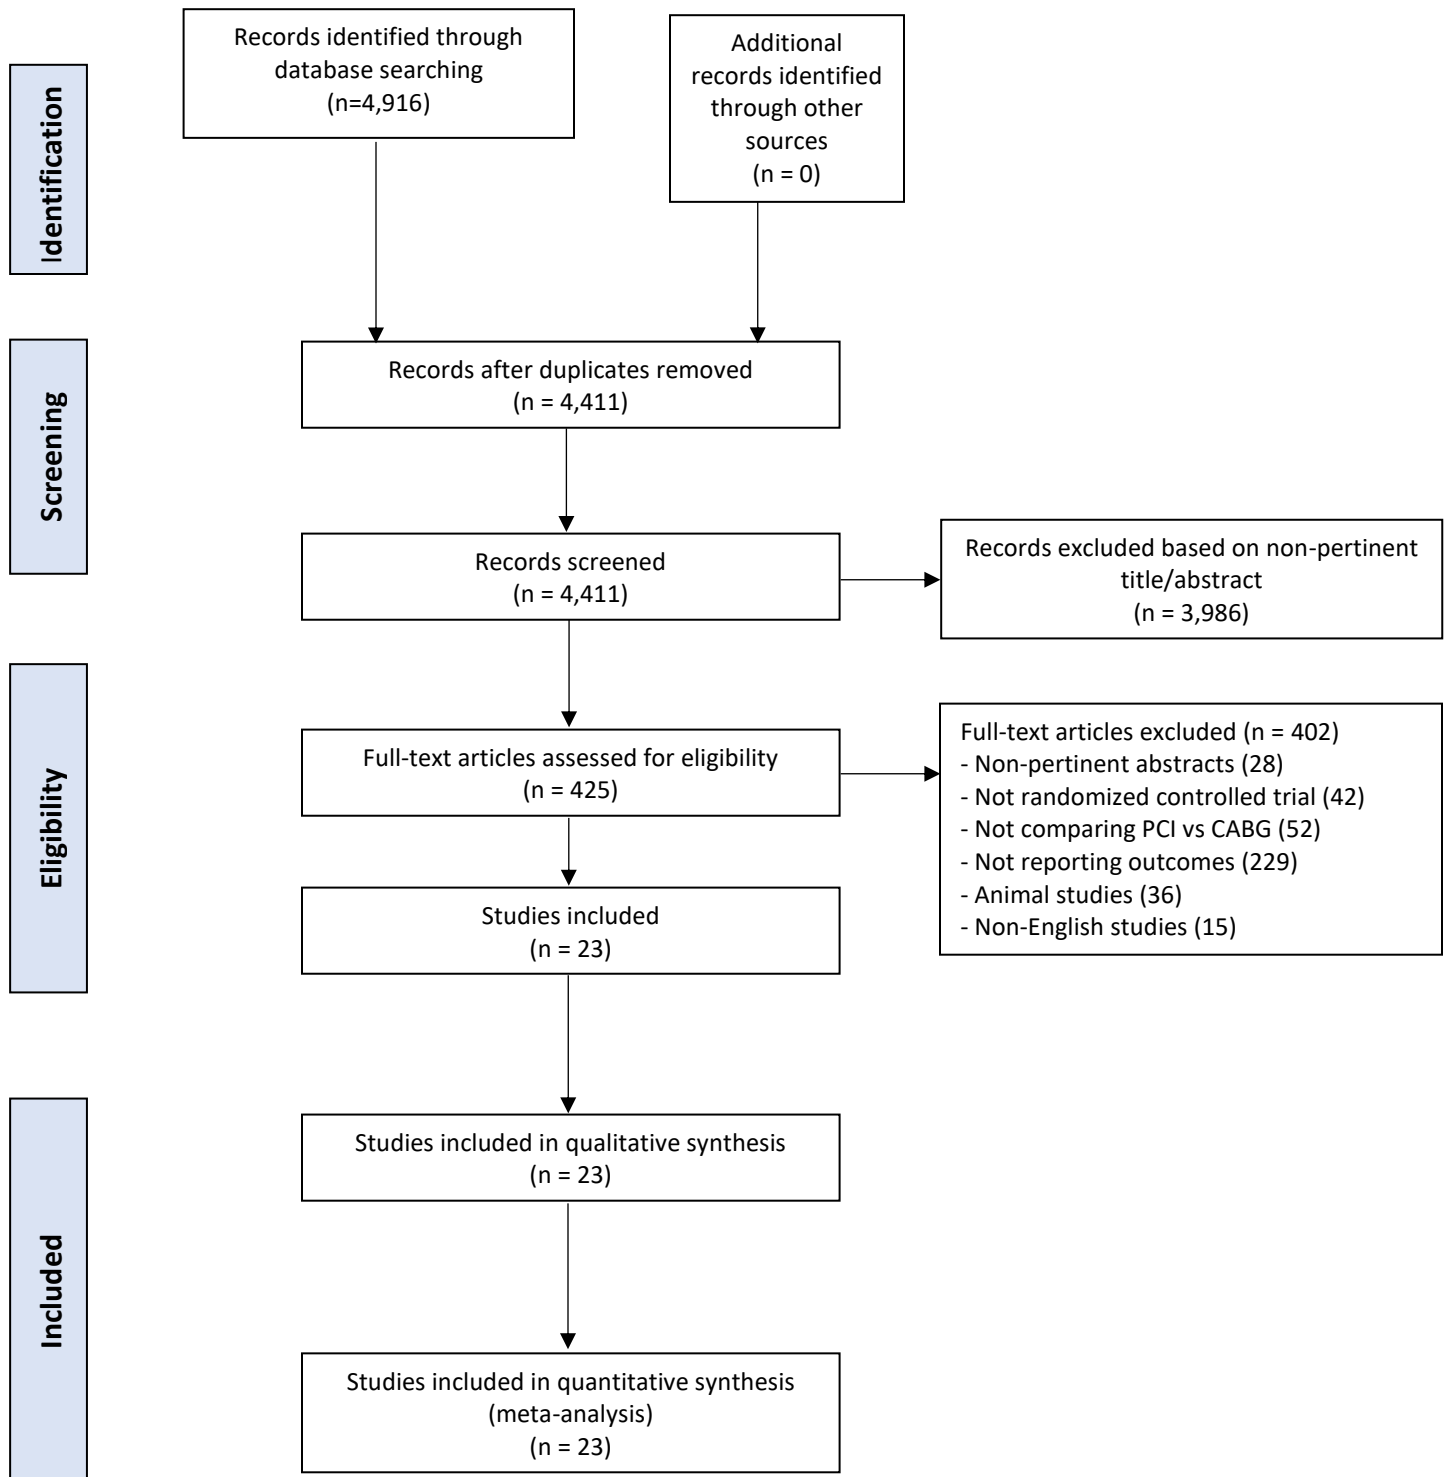

eFigure 2. Funnel Plot for Studies Reporting All-Cause Mortality

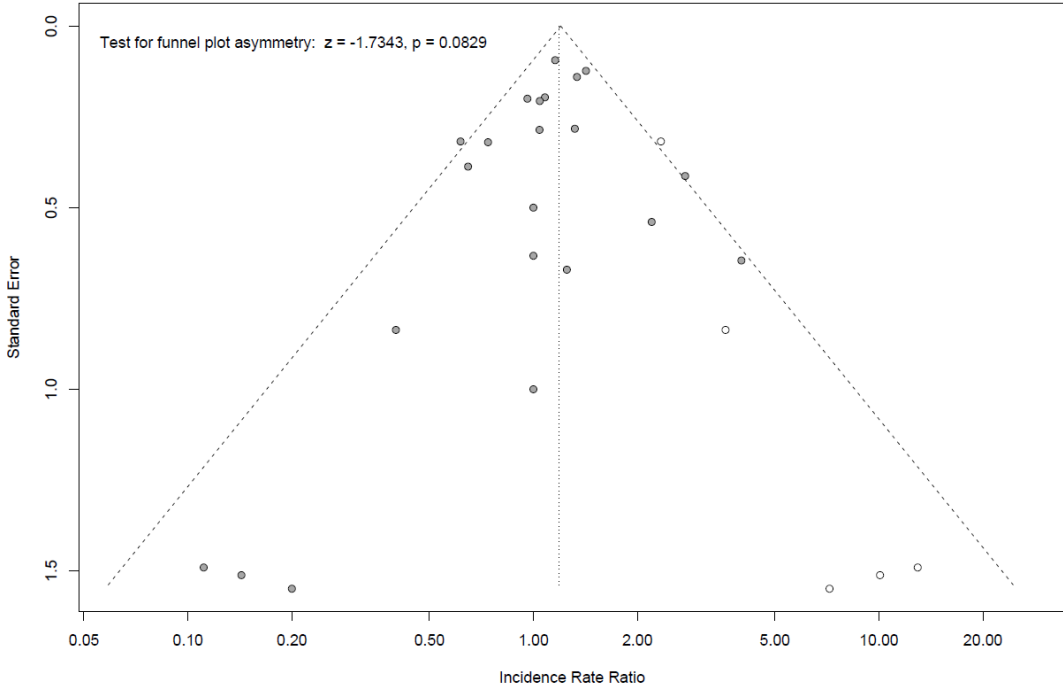

eFigure 3. Funnel Plot for Studies Reporting Cardiac Mortality

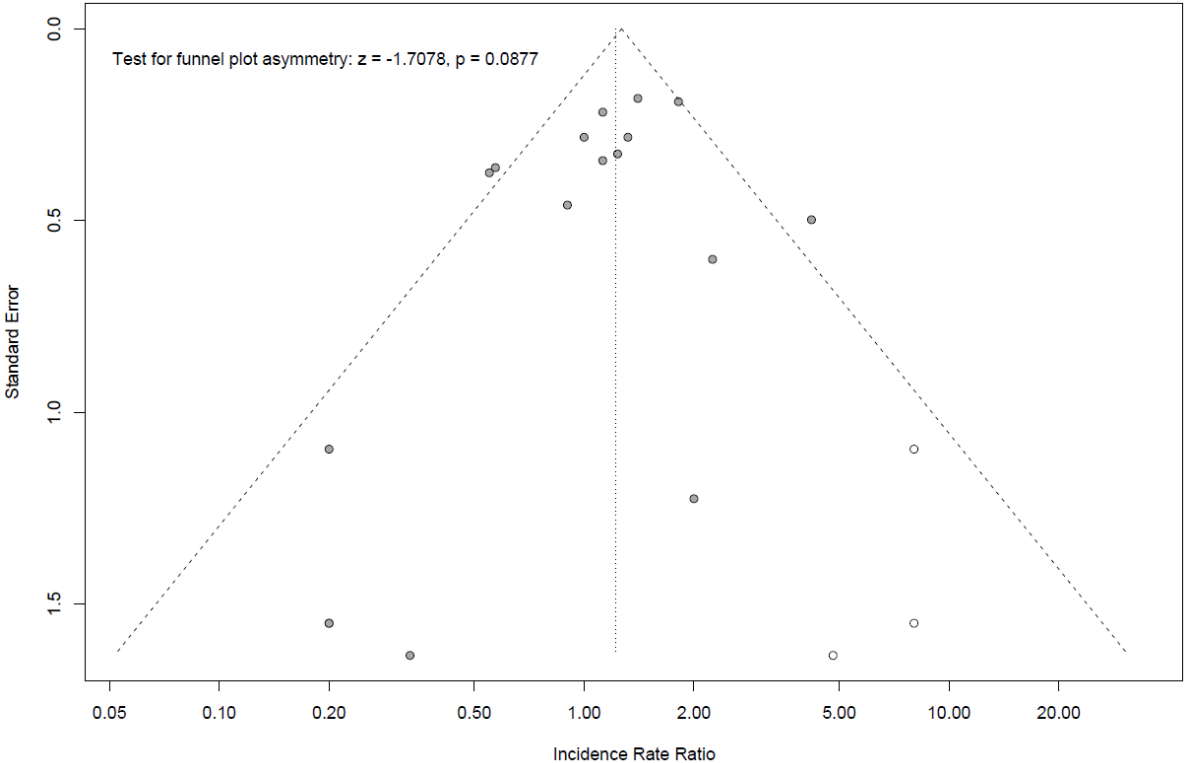

eFigure 4. Funnel Plot for Studies Reporting Noncardiac Mortality

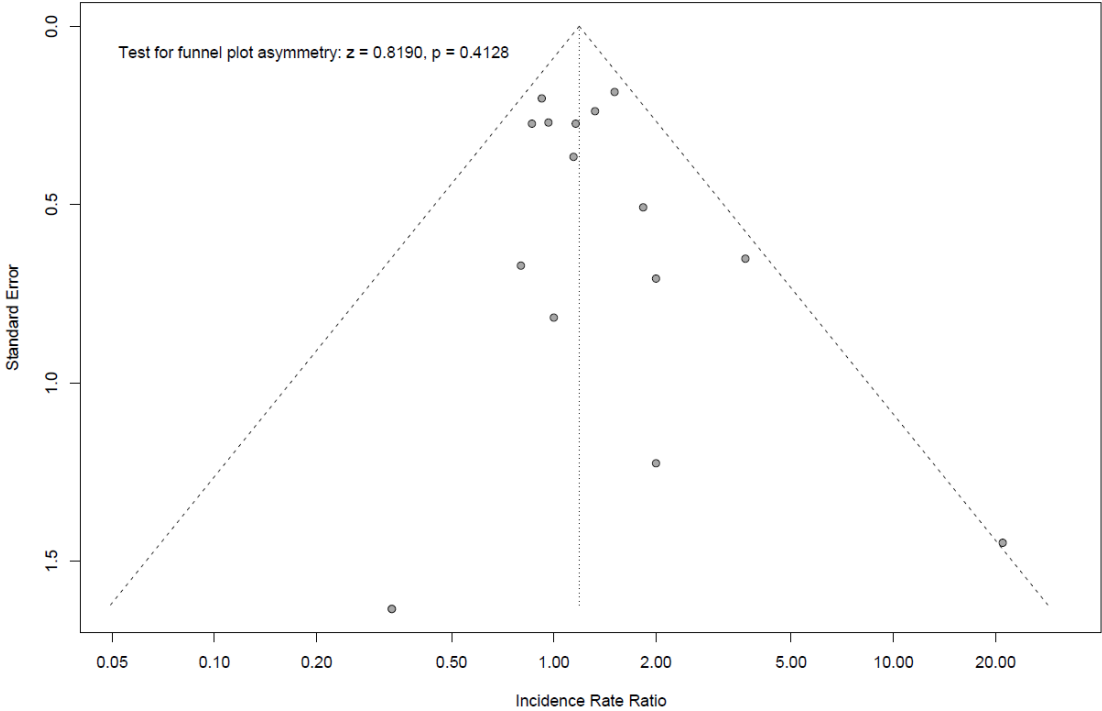

eFigure 5. Leave-One-Out Analysis for All-Cause Mortality for Fixed-Effects Model (A) and Random-Effects Model

A.

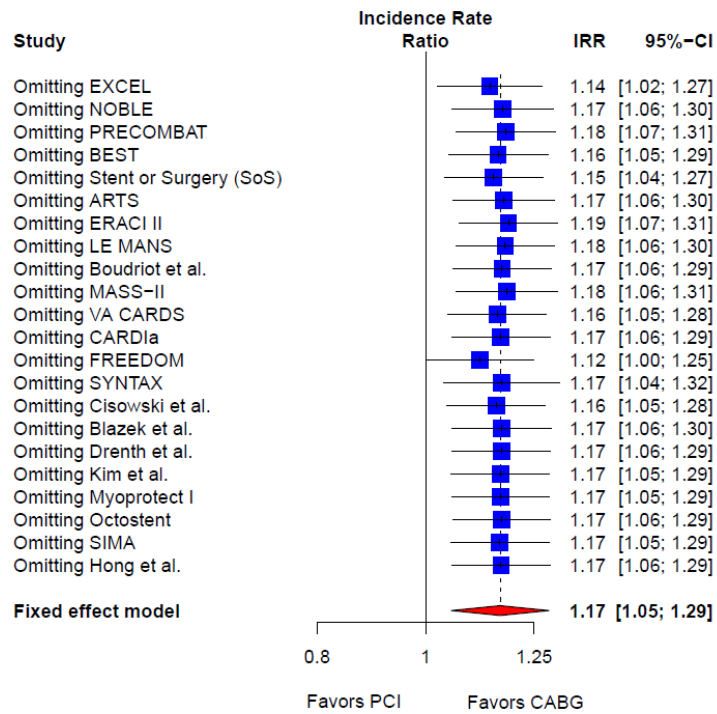



B.

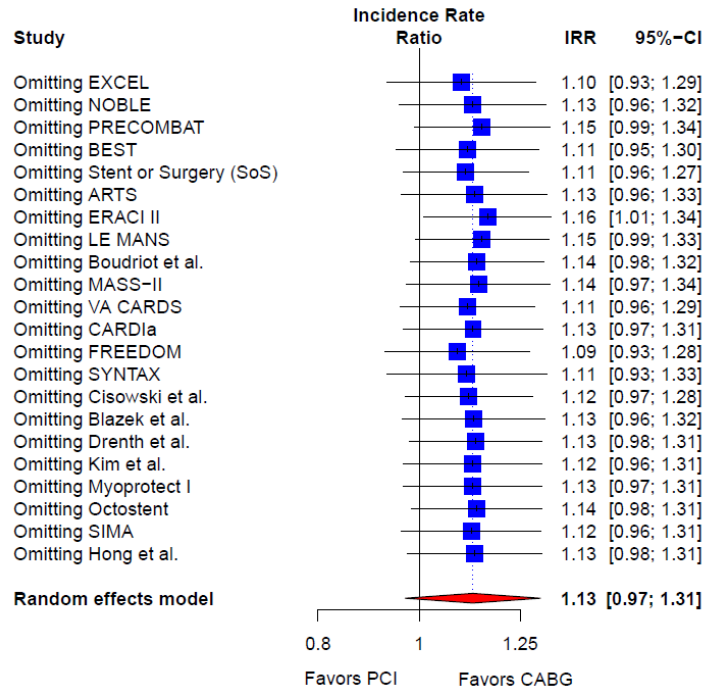

CABG: coronary artery bypass grafting; CI: confidence interval; IRR: incidence rate ratio; PCI: percutaneous coronary intervention.

eFigure 6. Leave-One-Out Analysis for Cardiac Mortality for Fixed-Effects Model (A) and Random-Effects Model (B)

A.

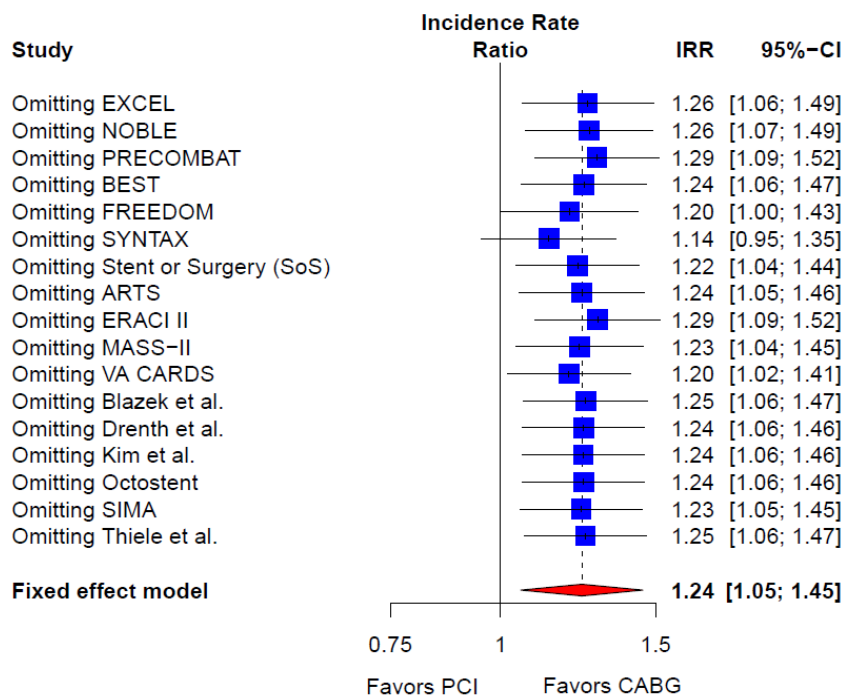

B.

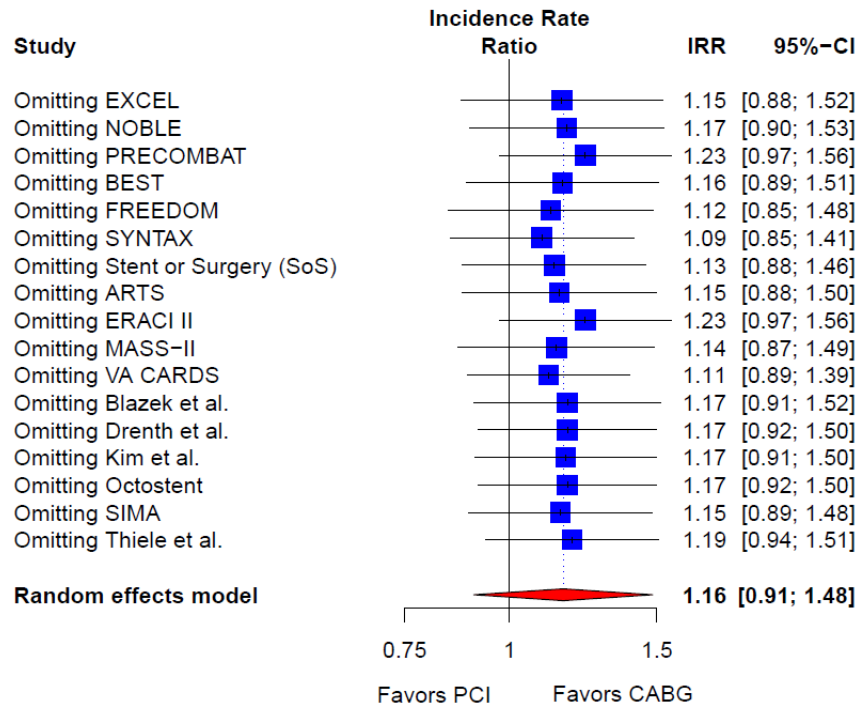

CABG: coronary artery bypass grafting; CI: confidence interval; IRR: incidence rate ratio; PCI: percutaneous coronary intervention.

eFigure 7. Leave-One-Out Analysis for Noncardiac Mortality for Fixed-Effects Model (A) and Random-Effects Model (B)

A.

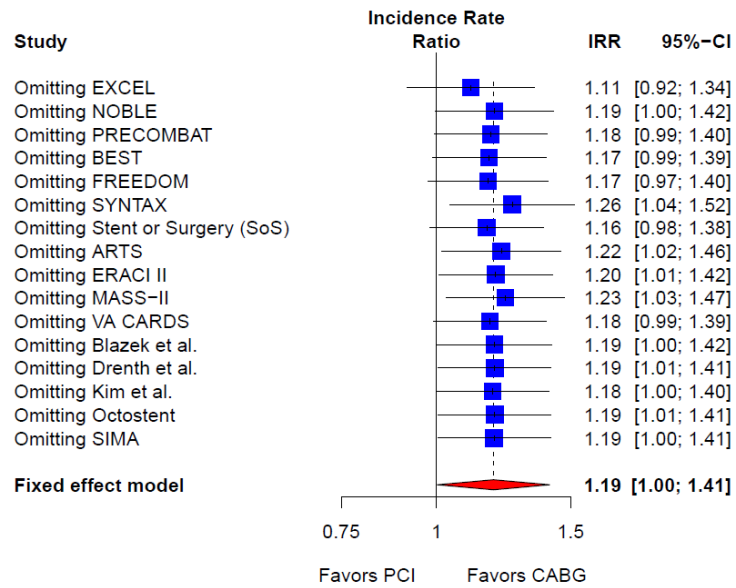

B.

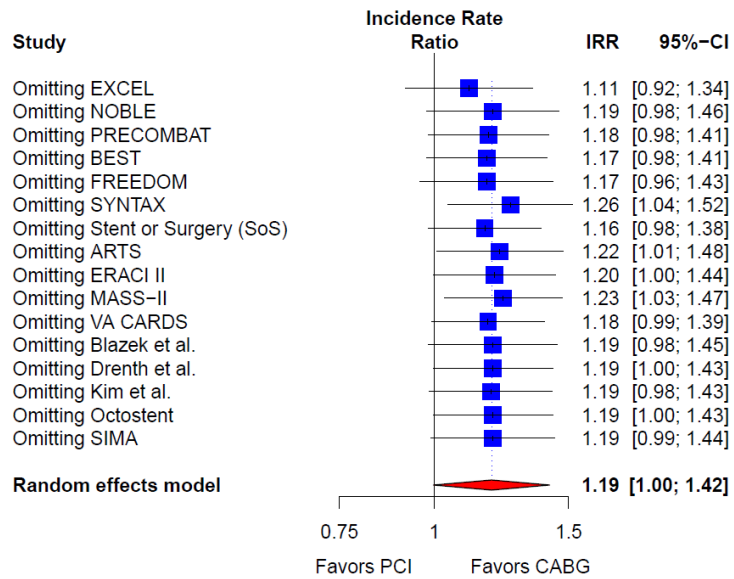

CABG: coronary artery bypass grafting; CI: confidence interval; IRR: incidence rate ratio; PCI: percutaneous coronary intervention.

**eFigure 8.** Subgroup Analysis for All-Cause Mortality for Trials Including Patients With Left Main Disease vs Non–Left Main Disease

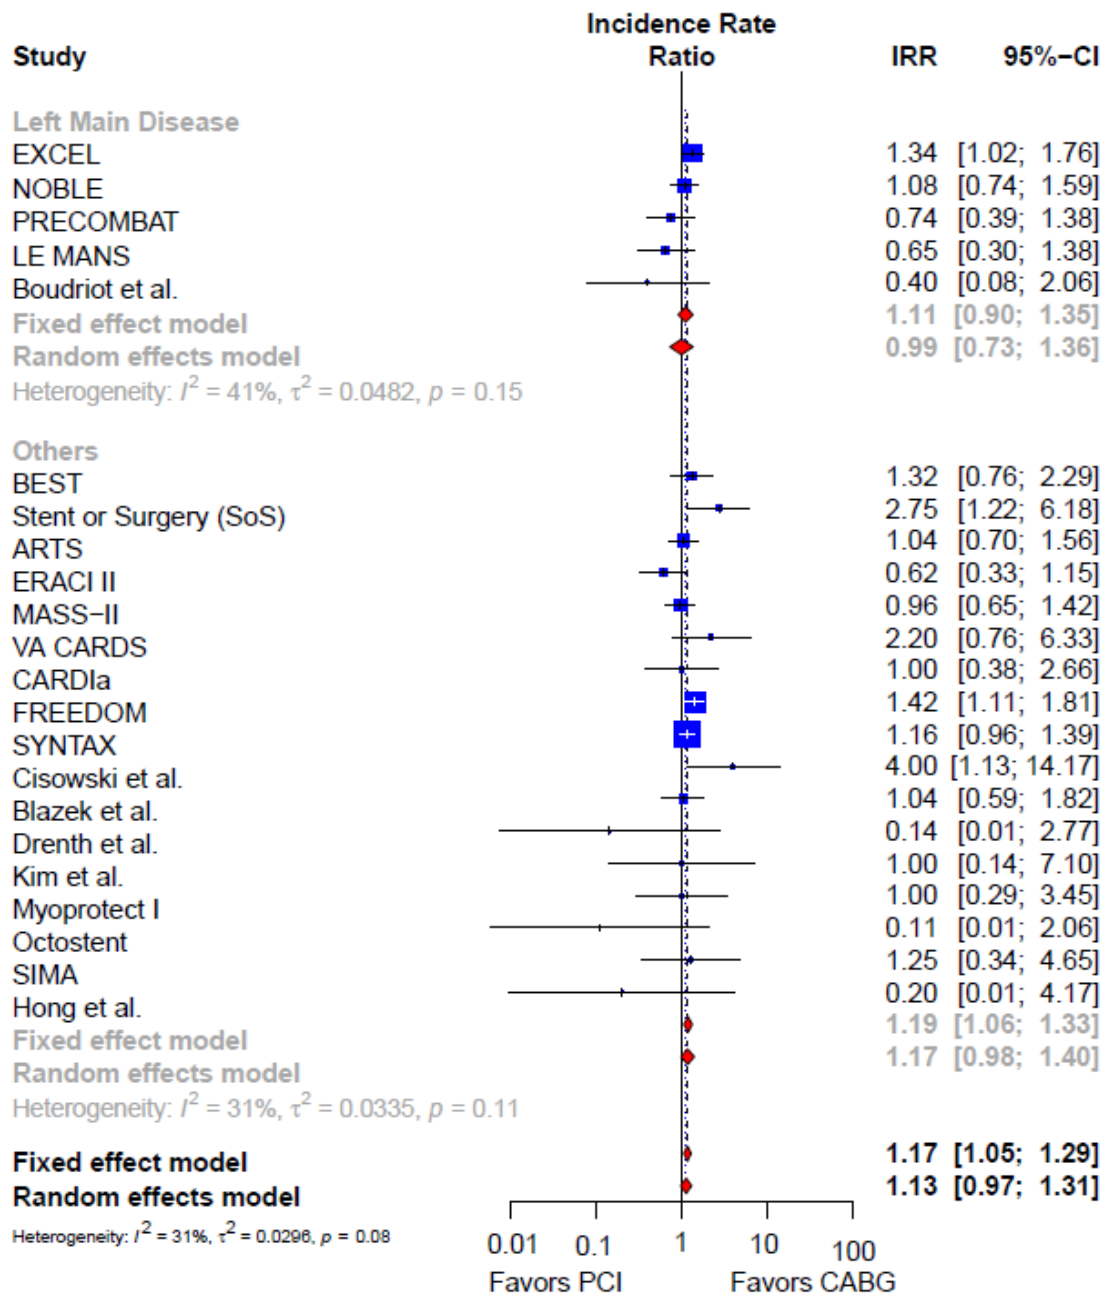

CABG: coronary artery bypass grafting; CI: confidence interval; IRR: incidence rate ratio; PCI: percutaneous coronary intervention.



eFigure 9. Subgroup Analysis for Cardiac Mortality for Trials Including Patients With Left Main Disease vs Non–Left Main Disease

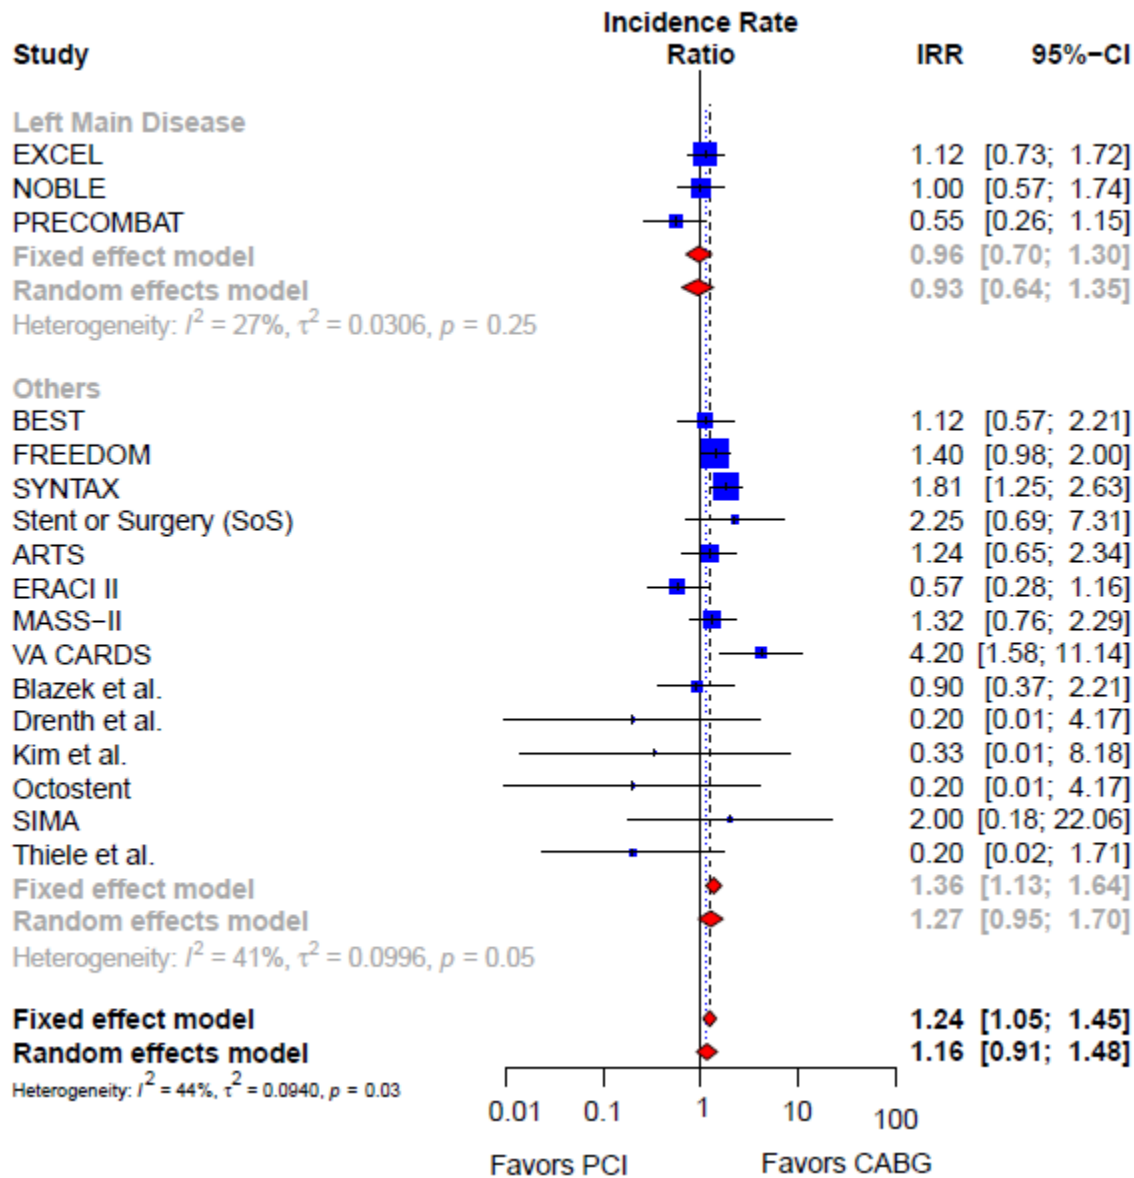

CABG: coronary artery bypass grafting; CI: confidence interval; IRR: incidence rate ratio; PCI: percutaneous coronary intervention.

eFigure 10. Subgroup Analysis for Noncardiac Mortality for Trials Including Patients With Left Main Disease vs Non-Left Main Disease

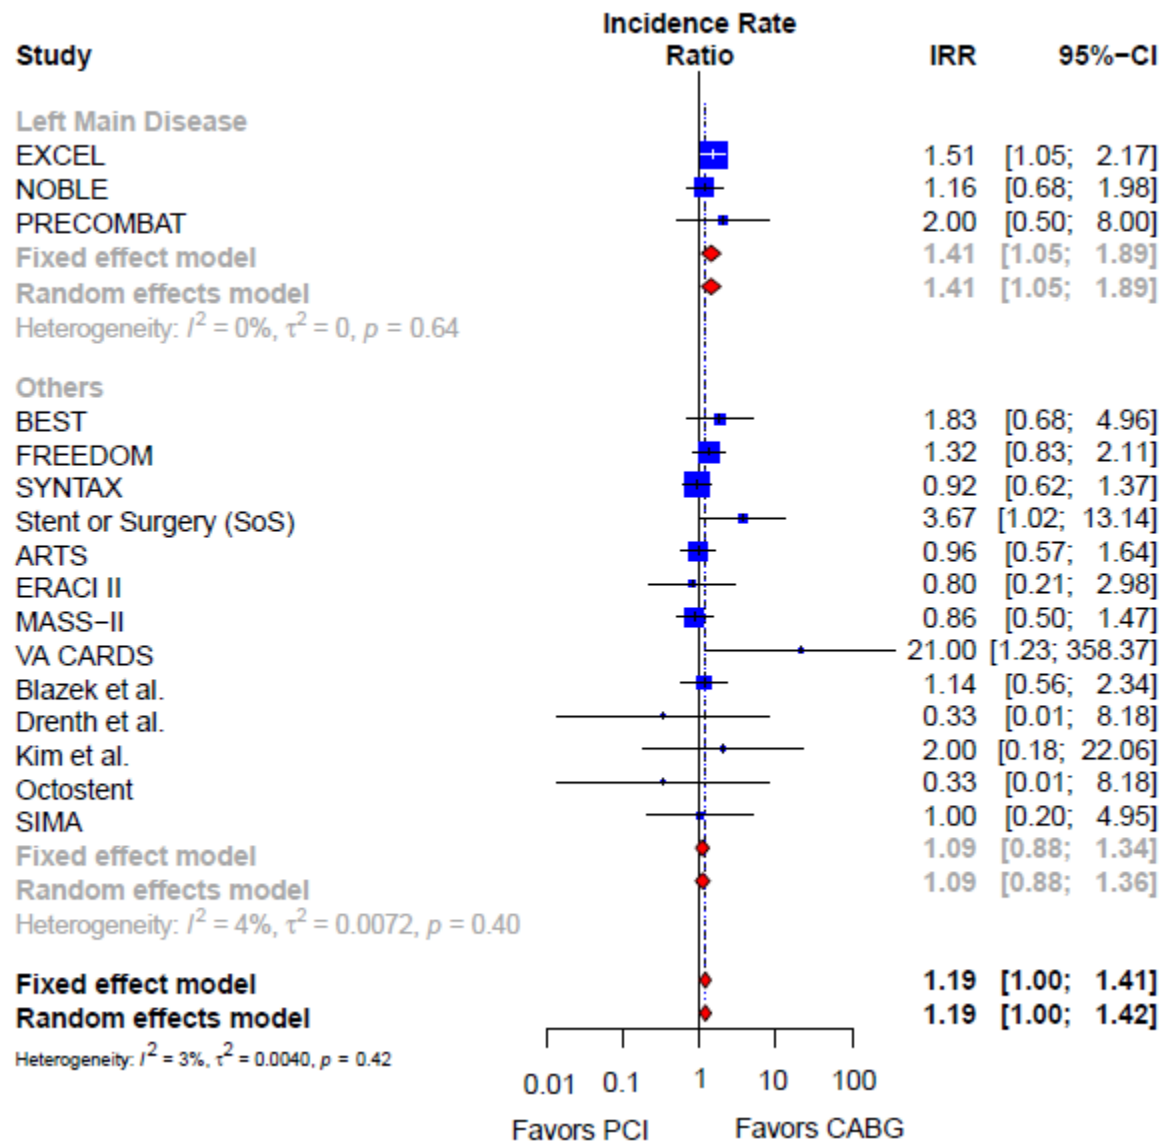

CABG: coronary artery bypass grafting; CI: confidence interval; IRR: incidence rate ratio; PCI: percutaneous coronary intervention.

eMethods. The Cochrane Risk-of-Bias Tool for Randomized Trials (RoB 2)

Study details

Reference

Park S-J, Ahn J-M, Kim Y-H, Park D-W, Yun S-C, Lee J-Y, et al. Trial of everolimus-eluting stents or bypass surgery for coronary disease. N Engl J Med. 2015 Mar 26;372(13):1204–12.

Study design

- Individually-randomized parallel-group trial
- Cluster-randomized parallel-group trial
- Individually randomized cross-over (or other matched) trial

For the purposes of this assessment, the interventions being compared are defined as

Experimental:  Comparator:

Specify which outcome is being assessed for risk of bias

Specify the numerical result being assessed. In case of multiple alternative analyses being presented, specify the numeric result (e.g. RR = 1.52 (95% CI 0.83 to 2.77) and/or a reference (e.g. to a table, figure or paragraph) that uniquely defines the result being assessed.

Is the review team's aim for this result...?

- to assess the effect of *assignment to intervention* (the 'intention-to-treat' effect)
- to assess the effect of *adhering to intervention* (the 'per-protocol' effect)

If the aim is to assess the effect of *adhering to intervention*, select the deviations from intended intervention that should be addressed (at least one must be checked):

- occurrence of non-protocol interventions
- failures in implementing the intervention that could have affected the outcome
- non-adherence to their assigned intervention by trial participants

Which of the following sources were obtained to help inform the risk-of-bias assessment? (tick as many as apply)

- Journal article(s) with results of the trial
- Trial protocol
- Statistical analysis plan (SAP)
- Non-commercial trial registry record (e.g. ClinicalTrials.gov record)
- Company-owned trial registry record (e.g. GSK Clinical Study Register record)
- “Grey literature” (e.g. unpublished thesis)
- Conference abstract(s) about the trial
- Regulatory document (e.g. Clinical Study Report, Drug Approval Package)
- Research ethics application
- Grant database summary (e.g. NIH RePORTER or Research Councils UK Gateway to Research)
- Personal communication with trialist
- Personal communication with the sponsor

Risk of bias assessment

Responses underlined in green are potential markers for low risk of bias, and responses in **red** are potential markers for a risk of bias. Where questions relate only to sign posts to other questions, no formatting is used.

Domain 1: Risk of bias arising from the randomization process

| Signalling questions                                                                                       | Comments | Response options |
|------------------------------------------------------------------------------------------------------------|----------|------------------|
| 1.1 Was the allocation sequence random?                                                                    |          | <u>Y</u>         |
| 1.2 Was the allocation sequence concealed until participants were enrolled and assigned to interventions?  |          | <u>Y</u>         |
| 1.3 Did baseline differences between intervention groups suggest a problem with the randomization process? |          | <u>N</u>         |
| Risk-of-bias judgement                                                                                     |          | Low              |
| Optional: What is the predicted direction of bias arising from the randomization process?                  |          | Unpredictable    |

Domain 2: Risk of bias due to deviations from the intended interventions (*effect of assignment to intervention*)

| Signalling questions                                                          | Comments | Response options |
|-------------------------------------------------------------------------------|----------|------------------|
| 2.1. Were participants aware of their assigned intervention during the trial? |          | <b>Y</b>         |

|                                                                                                                                                                                |  |               |
|--------------------------------------------------------------------------------------------------------------------------------------------------------------------------------|--|---------------|
| 2.2. Were carers and people delivering the interventions aware of participants' assigned intervention during the trial?                                                        |  | Y             |
| 2.3. <u>If Y/PY/NI to 2.1 or 2.2</u> : Were there deviations from the intended intervention that arose because of the trial context?                                           |  | Y             |
| 2.4 <u>If Y/PY to 2.3</u> : Were these deviations likely to have affected the outcome?                                                                                         |  | PY            |
| 2.5. <u>If Y/PY/NI to 2.4</u> : Were these deviations from intended intervention balanced between groups?                                                                      |  | <u>Y</u>      |
| 2.6 Was an appropriate analysis used to estimate the effect of assignment to intervention?                                                                                     |  | <u>Y</u>      |
| 2.7 <u>If N/PN/NI to 2.6</u> : Was there potential for a substantial impact (on the result) of the failure to analyse participants in the group to which they were randomized? |  | PY            |
| Risk-of-bias judgement                                                                                                                                                         |  | Some concerns |
| Optional: What is the predicted direction of bias due to deviations from intended interventions?                                                                               |  | Unpredictable |

Domain 2: Risk of bias due to deviations from the intended interventions (*effect of adhering to intervention*)

| Signalling questions                                                                                                                               | Comments | Response options |
|----------------------------------------------------------------------------------------------------------------------------------------------------|----------|------------------|
| 2.1. Were participants aware of their assigned intervention during the trial?                                                                      | N/A      | N/A              |
| 2.2. Were carers and people delivering the interventions aware of participants' assigned intervention during the trial?                            |          | N/A              |
| 2.3. [If applicable:] <u>If Y/PY/NI to 2.1 or 2.2</u> : Were important non-protocol interventions balanced across intervention groups?             | N/A      | N/A              |
| 2.4. [If applicable:] Were there failures in implementing the intervention that could have affected the outcome?                                   | N/A      | N/A              |
| 2.5. [If applicable:] Was there non-adherence to the assigned intervention regimen that could have affected participants' outcomes?                | N/A      | Y                |
| 2.6. <u>If N/PN/NI to 2.3, or Y/PY/NI to 2.4 or 2.5</u> : Was an appropriate analysis used to estimate the effect of adhering to the intervention? | N/A      | N/A              |
| Risk-of-bias judgement                                                                                                                             | N/A      | N/A              |
| Optional: What is the predicted direction of bias due to deviations from intended interventions?                                                   | N/A      | N/A              |

Domain 3: Missing outcome data

| Signalling questions | Comments | Response options |
|----------------------|----------|------------------|
|----------------------|----------|------------------|

|                                                                                                         |     |          |
|---------------------------------------------------------------------------------------------------------|-----|----------|
| 3.1 Were data for this outcome available for all, or nearly all, participants randomized?               |     | <u>Y</u> |
| 3.2 If <u>N/PN/NI</u> to 3.1: Is there evidence that the result was not biased by missing outcome data? | N/A | N/A      |
| 3.3 If <u>N/PN</u> to 3.2: Could missingness in the outcome depend on its true value?                   | N/A | N/A      |
| 3.4 If <u>Y/PY/NI</u> to 3.3: Is it likely that missingness in the outcome depended on its true value?  |     | N/A      |
| Risk-of-bias judgement                                                                                  |     | Low      |
| Optional: What is the predicted direction of bias due to missing outcome data?                          |     | NA       |

Domain 4: Risk of bias in measurement of the outcome

| Signalling questions                                                                                                            | Comments | Response options |
|---------------------------------------------------------------------------------------------------------------------------------|----------|------------------|
| 4.1 Was the method of measuring the outcome inappropriate?                                                                      |          | <u>N</u>         |
| 4.2 Could measurement or ascertainment of the outcome have differed between intervention groups?                                |          | <u>N</u>         |
| 4.3 If <u>N/PN/NI</u> to 4.1 and 4.2: Were outcome assessors aware of the intervention received by study participants?          |          | <u>PN</u>        |
| 4.4 If <u>Y/PY/NI</u> to 4.3: Could assessment of the outcome have been influenced by knowledge of intervention received?       |          | N/A              |
| 4.5 If <u>Y/PY/NI</u> to 4.4: Is it likely that assessment of the outcome was influenced by knowledge of intervention received? |          | N/A              |
| Risk-of-bias judgement                                                                                                          |          | Low              |
| Optional: What is the predicted direction of bias in measurement of the outcome?                                                |          | NA               |

Domain 5: Risk of bias in selection of the reported result

| Signalling questions                                                                                                                                                                | Comments | Response options |
|-------------------------------------------------------------------------------------------------------------------------------------------------------------------------------------|----------|------------------|
| 5.1 Were the data that produced this result analysed in accordance with a pre-specified analysis plan that was finalized before unblinded outcome data were available for analysis? |          | <u>PY</u>        |
| Is the numerical result being assessed likely to have been selected, on the basis of the results, from...                                                                           |          |                  |
| 5.2. ... multiple eligible outcome measurements (e.g. scales, definitions, time points) within the outcome domain?                                                                  |          | <u>N</u>         |
| 5.3 ... multiple eligible analyses of the data?                                                                                                                                     |          | <u>N</u>         |
| Risk-of-bias judgement                                                                                                                                                              |          | Low              |

|                                                                                            |  |    |
|--------------------------------------------------------------------------------------------|--|----|
| Optional: What is the predicted direction of bias due to selection of the reported result? |  | NA |
|--------------------------------------------------------------------------------------------|--|----|

Overall risk of bias

|                                                                             |  |     |
|-----------------------------------------------------------------------------|--|-----|
| <b>Risk-of-bias judgement</b>                                               |  | Low |
| Optional: What is the overall predicted direction of bias for this outcome? |  | NA  |

## Study details

### Reference

Rodriguez AE, Baldi J, Fernández Pereira C, Navia J, Rodriguez Alemparte M, Delacasa A, et al. Five-year follow-up of the Argentine randomized trial of coronary angioplasty with stenting versus coronary bypass surgery in patients with multiple vessel disease (ERACI II). *J Am Coll Cardiol*. 2005 Aug 16;46(4):582–8.

### Study design

- Individually-randomized parallel-group trial
- Cluster-randomized parallel-group trial
- Individually randomized cross-over (or other matched) trial

For the purposes of this assessment, the interventions being compared are defined as

Experimental:  Comparator:

Specify which outcome is being assessed for risk of bias

Specify the numerical result being assessed. In case of multiple alternative analyses being presented, specify the numeric result (e.g. RR = 1.52 (95% CI 0.83 to 2.77) and/or a reference (e.g. to a table, figure or paragraph) that uniquely defines the result being assessed.

Is the review team's aim for this result...?

- to assess the effect of *assignment to intervention* (the 'intention-to-treat' effect)
- to assess the effect of *adhering to intervention* (the 'per-protocol' effect)

If the aim is to assess the effect of *adhering to intervention*, select the deviations from intended intervention that should be addressed (at least one must be checked):

- occurrence of non-protocol interventions
- failures in implementing the intervention that could have affected the outcome
- non-adherence to their assigned intervention by trial participants



Which of the following sources were obtained to help inform the risk-of-bias assessment? (tick as many as apply)

- Journal article(s) with results of the trial
- Trial protocol
- Statistical analysis plan (SAP)
- Non-commercial trial registry record (e.g. ClinicalTrials.gov record)
- Company-owned trial registry record (e.g. GSK Clinical Study Register record)
- “Grey literature” (e.g. unpublished thesis)
- Conference abstract(s) about the trial
- Regulatory document (e.g. Clinical Study Report, Drug Approval Package)
- Research ethics application
- Grant database summary (e.g. NIH RePORTER or Research Councils UK Gateway to Research)
- Personal communication with trialist
- Personal communication with the sponsor

Risk of bias assessment

Responses underlined in green are potential markers for low risk of bias, and responses in **red** are potential markers for a risk of bias. Where questions relate only to sign posts to other questions, no formatting is used.

Domain 1: Risk of bias arising from the randomization process

| Signalling questions                                                                                       | Comments | Response options |
|------------------------------------------------------------------------------------------------------------|----------|------------------|
| 1.1 Was the allocation sequence random?                                                                    |          | <u>Y</u>         |
| 1.2 Was the allocation sequence concealed until participants were enrolled and assigned to interventions?  |          | <u>Y</u>         |
| 1.3 Did baseline differences between intervention groups suggest a problem with the randomization process? |          | <u>N</u>         |
| Risk-of-bias judgement                                                                                     |          | Low              |
| Optional: What is the predicted direction of bias arising from the randomization process?                  |          | Unpredictable    |

Domain 2: Risk of bias due to deviations from the intended interventions (*effect of assignment to intervention*)

| Signalling questions                                                          | Comments | Response options |
|-------------------------------------------------------------------------------|----------|------------------|
| 2.1. Were participants aware of their assigned intervention during the trial? |          | <b>Y</b>         |

|                                                                                                                                                                                |  |               |
|--------------------------------------------------------------------------------------------------------------------------------------------------------------------------------|--|---------------|
| 2.2. Were carers and people delivering the interventions aware of participants' assigned intervention during the trial?                                                        |  | Y             |
| 2.3. <u>If Y/PY/NI to 2.1 or 2.2</u> : Were there deviations from the intended intervention that arose because of the trial context?                                           |  | Y             |
| 2.4 <u>If Y/PY to 2.3</u> : Were these deviations likely to have affected the outcome?                                                                                         |  | PY            |
| 2.5. <u>If Y/PY/NI to 2.4</u> : Were these deviations from intended intervention balanced between groups?                                                                      |  | <u>Y</u>      |
| 2.6 Was an appropriate analysis used to estimate the effect of assignment to intervention?                                                                                     |  | <u>Y</u>      |
| 2.7 <u>If N/PN/NI to 2.6</u> : Was there potential for a substantial impact (on the result) of the failure to analyse participants in the group to which they were randomized? |  | PY            |
| Risk-of-bias judgement                                                                                                                                                         |  | Some concerns |
| Optional: What is the predicted direction of bias due to deviations from intended interventions?                                                                               |  | Unpredictable |

Domain 2: Risk of bias due to deviations from the intended interventions (*effect of adhering to intervention*)

| Signalling questions                                                                                                                               | Comments | Response options |
|----------------------------------------------------------------------------------------------------------------------------------------------------|----------|------------------|
| 2.1. Were participants aware of their assigned intervention during the trial?                                                                      | N/A      | N/A              |
| 2.2. Were carers and people delivering the interventions aware of participants' assigned intervention during the trial?                            |          | N/A              |
| 2.3. [If applicable:] <u>If Y/PY/NI to 2.1 or 2.2</u> : Were important non-protocol interventions balanced across intervention groups?             | N/A      | N/A              |
| 2.4. [If applicable:] Were there failures in implementing the intervention that could have affected the outcome?                                   | N/A      | N/A              |
| 2.5. [If applicable:] Was there non-adherence to the assigned intervention regimen that could have affected participants' outcomes?                | N/A      | Y                |
| 2.6. <u>If N/PN/NI to 2.3, or Y/PY/NI to 2.4 or 2.5</u> : Was an appropriate analysis used to estimate the effect of adhering to the intervention? | N/A      | N/A              |
| Risk-of-bias judgement                                                                                                                             | N/A      | N/A              |
| Optional: What is the predicted direction of bias due to deviations from intended interventions?                                                   | N/A      | N/A              |

Domain 3: Missing outcome data

| Signalling questions | Comments | Response options |
|----------------------|----------|------------------|
|----------------------|----------|------------------|

|                                                                                                         |     |          |
|---------------------------------------------------------------------------------------------------------|-----|----------|
| 3.1 Were data for this outcome available for all, or nearly all, participants randomized?               |     | <u>Y</u> |
| 3.2 If <u>N/PN/NI</u> to 3.1: Is there evidence that the result was not biased by missing outcome data? | N/A | N/A      |
| 3.3 If <u>N/PN</u> to 3.2: Could missingness in the outcome depend on its true value?                   | N/A | N/A      |
| 3.4 If <u>Y/PY/NI</u> to 3.3: Is it likely that missingness in the outcome depended on its true value?  |     | N/A      |
| <b>Risk-of-bias judgement</b>                                                                           |     | Low      |
| Optional: What is the predicted direction of bias due to missing outcome data?                          |     | NA       |

Domain 4: Risk of bias in measurement of the outcome

| Signalling questions                                                                                                                     | Comments | Response options   |
|------------------------------------------------------------------------------------------------------------------------------------------|----------|--------------------|
| 4.1 Was the method of measuring the outcome inappropriate?                                                                               |          | <a href="#">N</a>  |
| 4.2 Could measurement or ascertainment of the outcome have differed between intervention groups?                                         |          | <a href="#">N</a>  |
| 4.3 If <a href="#">N/PN/NI</a> to 4.1 and 4.2: Were outcome assessors aware of the intervention received by study participants?          |          | <a href="#">PN</a> |
| 4.4 If <a href="#">Y/PY/NI</a> to 4.3: Could assessment of the outcome have been influenced by knowledge of intervention received?       |          | N/A                |
| 4.5 If <a href="#">Y/PY/NI</a> to 4.4: Is it likely that assessment of the outcome was influenced by knowledge of intervention received? |          | N/A                |
| Risk-of-bias judgement                                                                                                                   |          | Low                |
| Optional: What is the predicted direction of bias in measurement of the outcome?                                                         |          | NA                 |

Domain 5: Risk of bias in selection of the reported result

| Signalling questions                                                                                                                                                                | Comments | Response options   |
|-------------------------------------------------------------------------------------------------------------------------------------------------------------------------------------|----------|--------------------|
| 5.1 Were the data that produced this result analysed in accordance with a pre-specified analysis plan that was finalized before unblinded outcome data were available for analysis? |          | <a href="#">PY</a> |
| Is the numerical result being assessed likely to have been selected, on the basis of the results, from...                                                                           |          |                    |
| 5.2. ... multiple eligible outcome measurements (e.g. scales, definitions, time points) within the outcome domain?                                                                  |          | <a href="#">N</a>  |
| 5.3 ... multiple eligible analyses of the data?                                                                                                                                     |          | <a href="#">N</a>  |
| Risk-of-bias judgement                                                                                                                                                              |          | Low                |
| Optional: What is the predicted direction of bias due to selection of the reported result?                                                                                          |          | NA                 |

Overall risk of bias

|                                                                             |  |     |
|-----------------------------------------------------------------------------|--|-----|
| Risk-of-bias judgement                                                      |  | Low |
| Optional: What is the overall predicted direction of bias for this outcome? |  | NA  |



**Study details**

**Reference**

Stone GW, Kappetein AP, Sabik JF, Pocock SJ, Morice M-C, Puskas J, et al. Five-Year Outcomes after PCI or CABG for Left Main Coronary Disease. N Engl J Med. 2019 Sep 28;0(0).

**Study design**

- Individually-randomized parallel-group trial
- Cluster-randomized parallel-group trial
- Individually randomized cross-over (or other matched) trial

**For the purposes of this assessment, the interventions being compared are defined as**

Experimental:  Comparator:

**Specify which outcome is being assessed for risk of bias**

**Specify the numerical result being assessed.** In case of multiple alternative analyses being presented, specify the numeric result (e.g. RR = 1.52 (95% CI 0.83 to 2.77) and/or a reference (e.g. to a table, figure or paragraph) that uniquely defines the result being assessed.

**Is the review team's aim for this result...?**

- to assess the effect of *assignment to intervention* (the 'intention-to-treat' effect)
- to assess the effect of *adhering to intervention* (the 'per-protocol' effect)

**If the aim is to assess the effect of *adhering to intervention*, select the deviations from intended intervention that should be addressed (at least one must be checked):**

- occurrence of non-protocol interventions
- failures in implementing the intervention that could have affected the outcome
- non-adherence to their assigned intervention by trial participants

**Which of the following sources were obtained to help inform the risk-of-bias assessment? (tick as many as apply)**

- Journal article(s) with results of the trial

- Trial protocol
- Statistical analysis plan (SAP)
- Non-commercial trial registry record (e.g. ClinicalTrials.gov record)
- Company-owned trial registry record (e.g. GSK Clinical Study Register record)
- “Grey literature” (e.g. unpublished thesis)
- Conference abstract(s) about the trial
- Regulatory document (e.g. Clinical Study Report, Drug Approval Package)
- Research ethics application
- Grant database summary (e.g. NIH RePORTER or Research Councils UK Gateway to Research)
- Personal communication with trialist
- Personal communication with the sponsor

Risk of bias assessment

Responses underlined in green are potential markers for low risk of bias, and responses in **red** are potential markers for a risk of bias. Where questions relate only to sign posts to other questions, no formatting is used.

Domain 1: Risk of bias arising from the randomization process

| Signalling questions                                                                                       | Comments | Response options |
|------------------------------------------------------------------------------------------------------------|----------|------------------|
| 1.1 Was the allocation sequence random?                                                                    |          | <u>Y</u>         |
| 1.2 Was the allocation sequence concealed until participants were enrolled and assigned to interventions?  |          | <u>Y</u>         |
| 1.3 Did baseline differences between intervention groups suggest a problem with the randomization process? |          | <u>N</u>         |
| Risk-of-bias judgement                                                                                     |          | Low              |
| Optional: What is the predicted direction of bias arising from the randomization process?                  |          | Unpredictable    |

Domain 2: Risk of bias due to deviations from the intended interventions (*effect of assignment to intervention*)

| Signalling questions                                                                                                    | Comments | Response options |
|-------------------------------------------------------------------------------------------------------------------------|----------|------------------|
| 2.1. Were participants aware of their assigned intervention during the trial?                                           |          | <b>Y</b>         |
| 2.2. Were carers and people delivering the interventions aware of participants' assigned intervention during the trial? |          | <b>Y</b>         |

|                                                                                                                                                                               |  |               |
|-------------------------------------------------------------------------------------------------------------------------------------------------------------------------------|--|---------------|
| 2.3. If <u>Y/PY/NI</u> to 2.1 or 2.2: Were there deviations from the intended intervention that arose because of the trial context?                                           |  | Y             |
| 2.4 If <u>Y/PY</u> to 2.3: Were these deviations likely to have affected the outcome?                                                                                         |  | PY            |
| 2.5. If <u>Y/PY/NI</u> to 2.4: Were these deviations from intended intervention balanced between groups?                                                                      |  | Y             |
| 2.6 Was an appropriate analysis used to estimate the effect of assignment to intervention?                                                                                    |  | Y             |
| 2.7 If <u>N/PN/NI</u> to 2.6: Was there potential for a substantial impact (on the result) of the failure to analyse participants in the group to which they were randomized? |  | PY            |
| Risk-of-bias judgement                                                                                                                                                        |  | Some concerns |
| Optional: What is the predicted direction of bias due to deviations from intended interventions?                                                                              |  | Unpredictable |

Domain 2: Risk of bias due to deviations from the intended interventions (*effect of adhering to intervention*)

| Signalling questions                                                                                                                                     | Comments | Response options |
|----------------------------------------------------------------------------------------------------------------------------------------------------------|----------|------------------|
| 2.1. Were participants aware of their assigned intervention during the trial?                                                                            | N/A      | N/A              |
| 2.2. Were carers and people delivering the interventions aware of participants' assigned intervention during the trial?                                  |          | N/A              |
| 2.3. [If applicable:] If <u>Y/PY/NI</u> to 2.1 or 2.2: Were important non-protocol interventions balanced across intervention groups?                    | N/A      | N/A              |
| 2.4. [If applicable:] Were there failures in implementing the intervention that could have affected the outcome?                                         | N/A      | N/A              |
| 2.5. [If applicable:] Was there non-adherence to the assigned intervention regimen that could have affected participants' outcomes?                      | N/A      | Y                |
| 2.6. If <u>N/PN/NI</u> to 2.3, or <u>Y/PY/NI</u> to 2.4 or 2.5: Was an appropriate analysis used to estimate the effect of adhering to the intervention? | N/A      | N/A              |
| Risk-of-bias judgement                                                                                                                                   | N/A      | N/A              |
| Optional: What is the predicted direction of bias due to deviations from intended interventions?                                                         | N/A      | N/A              |

Domain 3: Missing outcome data

| Signalling questions                                                                      | Comments | Response options |
|-------------------------------------------------------------------------------------------|----------|------------------|
| 3.1 Were data for this outcome available for all, or nearly all, participants randomized? |          | Y                |



|                                                                                                         |     |     |
|---------------------------------------------------------------------------------------------------------|-----|-----|
| 3.2 If <b>N/PN/NI</b> to 3.1: Is there evidence that the result was not biased by missing outcome data? | N/A | N/A |
| 3.3 If <b>N/PN</b> to 3.2: Could missingness in the outcome depend on its true value?                   | N/A | N/A |
| 3.4 If <b>Y/PY/NI</b> to 3.3: Is it likely that missingness in the outcome depended on its true value?  |     | N/A |
| <b>Risk-of-bias judgement</b>                                                                           |     | Low |
| Optional: What is the predicted direction of bias due to missing outcome data?                          |     | NA  |

Domain 4: Risk of bias in measurement of the outcome

| Signalling questions                                                                                                            | Comments | Response options |
|---------------------------------------------------------------------------------------------------------------------------------|----------|------------------|
| 4.1 Was the method of measuring the outcome inappropriate?                                                                      |          | <u>N</u>         |
| 4.2 Could measurement or ascertainment of the outcome have differed between intervention groups?                                |          | <u>N</u>         |
| 4.3 If <u>N/PN/NI</u> to 4.1 and 4.2: Were outcome assessors aware of the intervention received by study participants?          |          | <u>PN</u>        |
| 4.4 If <u>Y/PY/NI</u> to 4.3: Could assessment of the outcome have been influenced by knowledge of intervention received?       |          | N/A              |
| 4.5 If <u>Y/PY/NI</u> to 4.4: Is it likely that assessment of the outcome was influenced by knowledge of intervention received? |          | N/A              |
| Risk-of-bias judgement                                                                                                          |          | Low              |
| Optional: What is the predicted direction of bias in measurement of the outcome?                                                |          | NA               |

Domain 5: Risk of bias in selection of the reported result

| Signalling questions                                                                                                                                                                | Comments | Response options |
|-------------------------------------------------------------------------------------------------------------------------------------------------------------------------------------|----------|------------------|
| 5.1 Were the data that produced this result analysed in accordance with a pre-specified analysis plan that was finalized before unblinded outcome data were available for analysis? |          | <u>PY</u>        |
| Is the numerical result being assessed likely to have been selected, on the basis of the results, from...                                                                           |          |                  |
| 5.2. ... multiple eligible outcome measurements (e.g. scales, definitions, time points) within the outcome domain?                                                                  |          | <u>N</u>         |
| 5.3 ... multiple eligible analyses of the data?                                                                                                                                     |          | <u>N</u>         |
| Risk-of-bias judgement                                                                                                                                                              |          | Low              |
| Optional: What is the predicted direction of bias due to selection of the reported result?                                                                                          |          | NA               |

Overall risk of bias

|                                                                             |  |     |
|-----------------------------------------------------------------------------|--|-----|
| Risk-of-bias judgement                                                      |  | Low |
| Optional: What is the overall predicted direction of bias for this outcome? |  | NA  |



**Study details**

**Reference**

Farkouh ME, Domanski M, Sleeper LA, Siami FS, Dangas G, Mack M, et al. Strategies for Multivessel Revascularization in Patients with Diabetes. N Engl J Med. 2012 Dec 20;367(25):2375–84.

**Study design**

- Individually-randomized parallel-group trial
- Cluster-randomized parallel-group trial
- Individually randomized cross-over (or other matched) trial

**For the purposes of this assessment, the interventions being compared are defined as**

Experimental:  Comparator:

**Specify which outcome is being assessed for risk of bias**

**Specify the numerical result being assessed.** In case of multiple alternative analyses being presented, specify the numeric result (e.g. RR = 1.52 (95% CI 0.83 to 2.77) and/or a reference (e.g. to a table, figure or paragraph) that uniquely defines the result being assessed.

**Is the review team’s aim for this result...?**

- to assess the effect of *assignment to intervention* (the ‘intention-to-treat’ effect)
- to assess the effect of *adhering to intervention* (the ‘per-protocol’ effect)

**If the aim is to assess the effect of *adhering to intervention*, select the deviations from intended intervention that should be addressed (at least one must be checked):**

- occurrence of non-protocol interventions
- failures in implementing the intervention that could have affected the outcome
- non-adherence to their assigned intervention by trial participants

**Which of the following sources were obtained to help inform the risk-of-bias assessment? (tick as many as apply)**

- Journal article(s) with results of the trial

- Trial protocol
- Statistical analysis plan (SAP)
- Non-commercial trial registry record (e.g. ClinicalTrials.gov record)
- Company-owned trial registry record (e.g. GSK Clinical Study Register record)
- “Grey literature” (e.g. unpublished thesis)
- Conference abstract(s) about the trial
- Regulatory document (e.g. Clinical Study Report, Drug Approval Package)
- Research ethics application
- Grant database summary (e.g. NIH RePORTER or Research Councils UK Gateway to Research)
- Personal communication with trialist
- Personal communication with the sponsor

#### Risk of bias assessment

Responses underlined in green are potential markers for low risk of bias, and responses in **red** are potential markers for a risk of bias. Where questions relate only to sign posts to other questions, no formatting is used.

#### Domain 1: Risk of bias arising from the randomization process

| Signalling questions                                                                                       | Comments | Response options |
|------------------------------------------------------------------------------------------------------------|----------|------------------|
| 1.1 Was the allocation sequence random?                                                                    |          | <u>Y</u>         |
| 1.2 Was the allocation sequence concealed until participants were enrolled and assigned to interventions?  |          | <u>Y</u>         |
| 1.3 Did baseline differences between intervention groups suggest a problem with the randomization process? |          | <u>N</u>         |
| Risk-of-bias judgement                                                                                     |          | Low              |
| Optional: What is the predicted direction of bias arising from the randomization process?                  |          | Unpredictable    |

#### Domain 2: Risk of bias due to deviations from the intended interventions (*effect of assignment to intervention*)

| Signalling questions                                                                                                    | Comments | Response options |
|-------------------------------------------------------------------------------------------------------------------------|----------|------------------|
| 2.1. Were participants aware of their assigned intervention during the trial?                                           |          | <b>Y</b>         |
| 2.2. Were carers and people delivering the interventions aware of participants' assigned intervention during the trial? |          | <b>Y</b>         |

|                                                                                                                                                                               |  |               |
|-------------------------------------------------------------------------------------------------------------------------------------------------------------------------------|--|---------------|
| 2.3. If <b>Y/PY/NI</b> to 2.1 or 2.2: Were there deviations from the intended intervention that arose because of the trial context?                                           |  | <b>Y</b>      |
| 2.4 If <b>Y/PY</b> to 2.3: Were these deviations likely to have affected the outcome?                                                                                         |  | <b>PY</b>     |
| 2.5. If <b>Y/PY/NI</b> to 2.4: Were these deviations from intended intervention balanced between groups?                                                                      |  | <b>Y</b>      |
| 2.6 Was an appropriate analysis used to estimate the effect of assignment to intervention?                                                                                    |  | <b>Y</b>      |
| 2.7 If <b>N/PN/NI</b> to 2.6: Was there potential for a substantial impact (on the result) of the failure to analyse participants in the group to which they were randomized? |  | <b>PY</b>     |
| Risk-of-bias judgement                                                                                                                                                        |  | Some concerns |
| Optional: What is the predicted direction of bias due to deviations from intended interventions?                                                                              |  | Unpredictable |

Domain 2: Risk of bias due to deviations from the intended interventions (*effect of adhering to intervention*)

| Signalling questions                                                                                                                                     | Comments | Response options |
|----------------------------------------------------------------------------------------------------------------------------------------------------------|----------|------------------|
| 2.1. Were participants aware of their assigned intervention during the trial?                                                                            | N/A      | N/A              |
| 2.2. Were carers and people delivering the interventions aware of participants' assigned intervention during the trial?                                  |          | N/A              |
| 2.3. [If applicable:] If <b>Y/PY/NI</b> to 2.1 or 2.2: Were important non-protocol interventions balanced across intervention groups?                    | N/A      | N/A              |
| 2.4. [If applicable:] Were there failures in implementing the intervention that could have affected the outcome?                                         | N/A      | N/A              |
| 2.5. [If applicable:] Was there non-adherence to the assigned intervention regimen that could have affected participants' outcomes?                      | N/A      | <b>Y</b>         |
| 2.6. If <b>N/PN/NI</b> to 2.3, or <b>Y/PY/NI</b> to 2.4 or 2.5: Was an appropriate analysis used to estimate the effect of adhering to the intervention? | N/A      | N/A              |
| Risk-of-bias judgement                                                                                                                                   | N/A      | N/A              |
| Optional: What is the predicted direction of bias due to deviations from intended interventions?                                                         | N/A      | N/A              |

Domain 3: Missing outcome data

| Signalling questions                                                                      | Comments | Response options |
|-------------------------------------------------------------------------------------------|----------|------------------|
| 3.1 Were data for this outcome available for all, or nearly all, participants randomized? |          | <b>Y</b>         |

|                                                                                                         |     |     |
|---------------------------------------------------------------------------------------------------------|-----|-----|
| 3.2 If <b>N/PN/NI</b> to 3.1: Is there evidence that the result was not biased by missing outcome data? | N/A | N/A |
| 3.3 If <b>N/PN</b> to 3.2: Could missingness in the outcome depend on its true value?                   | N/A | N/A |
| 3.4 If <b>Y/PY/NI</b> to 3.3: Is it likely that missingness in the outcome depended on its true value?  |     | N/A |
| <b>Risk-of-bias judgement</b>                                                                           |     | Low |
| Optional: What is the predicted direction of bias due to missing outcome data?                          |     | NA  |

Domain 4: Risk of bias in measurement of the outcome

| Signalling questions                                                                                                            | Comments | Response options |
|---------------------------------------------------------------------------------------------------------------------------------|----------|------------------|
| 4.1 Was the method of measuring the outcome inappropriate?                                                                      |          | <u>N</u>         |
| 4.2 Could measurement or ascertainment of the outcome have differed between intervention groups?                                |          | <u>N</u>         |
| 4.3 If <u>N/PN/NI</u> to 4.1 and 4.2: Were outcome assessors aware of the intervention received by study participants?          |          | <u>PN</u>        |
| 4.4 If <u>Y/PY/NI</u> to 4.3: Could assessment of the outcome have been influenced by knowledge of intervention received?       |          | N/A              |
| 4.5 If <u>Y/PY/NI</u> to 4.4: Is it likely that assessment of the outcome was influenced by knowledge of intervention received? |          | N/A              |
| Risk-of-bias judgement                                                                                                          |          | Low              |
| Optional: What is the predicted direction of bias in measurement of the outcome?                                                |          | NA               |

Domain 5: Risk of bias in selection of the reported result

| Signalling questions                                                                                                                                                                | Comments | Response options |
|-------------------------------------------------------------------------------------------------------------------------------------------------------------------------------------|----------|------------------|
| 5.1 Were the data that produced this result analysed in accordance with a pre-specified analysis plan that was finalized before unblinded outcome data were available for analysis? |          | <u>PY</u>        |
| Is the numerical result being assessed likely to have been selected, on the basis of the results, from...                                                                           |          |                  |
| 5.2. ... multiple eligible outcome measurements (e.g. scales, definitions, time points) within the outcome domain?                                                                  |          | <u>N</u>         |
| 5.3 ... multiple eligible analyses of the data?                                                                                                                                     |          | <u>N</u>         |
| Risk-of-bias judgement                                                                                                                                                              |          | Low              |
| Optional: What is the predicted direction of bias due to selection of the reported result?                                                                                          |          | NA               |

Overall risk of bias

|                                                                             |  |     |
|-----------------------------------------------------------------------------|--|-----|
| Risk-of-bias judgement                                                      |  | Low |
| Optional: What is the overall predicted direction of bias for this outcome? |  | NA  |





**Study details**

**Reference**

Hueb W, Lopes N, Gersh BJ, Soares PR, Ribeiro EE, Pereira AC, et al. Ten-year follow-up survival of the Medicine, Angioplasty, or Surgery Study (MASS II): a randomized controlled clinical trial of 3 therapeutic strategies for multivessel coronary artery disease. *Circulation*. 2010 Sep 7;122(10):949–57.

**Study design**

- Individually-randomized parallel-group trial
- Cluster-randomized parallel-group trial
- Individually randomized cross-over (or other matched) trial

**For the purposes of this assessment, the interventions being compared are defined as**

Experimental:  Comparator:

**Specify which outcome is being assessed for risk of bias**

**Specify the numerical result being assessed.** In case of multiple alternative analyses being presented, specify the numeric result (e.g. RR = 1.52 (95% CI 0.83 to 2.77) and/or a reference (e.g. to a table, figure or paragraph) that uniquely defines the result being assessed.

**Is the review team’s aim for this result...?**

- to assess the effect of *assignment to intervention* (the ‘intention-to-treat’ effect)
- to assess the effect of *adhering to intervention* (the ‘per-protocol’ effect)

**If the aim is to assess the effect of *adhering to intervention***, select the deviations from intended intervention that should be addressed (at least one must be checked):

- occurrence of non-protocol interventions
- failures in implementing the intervention that could have affected the outcome
- non-adherence to their assigned intervention by trial participants

**Which of the following sources were obtained to help inform the risk-of-bias assessment? (tick as many as apply)**

- Journal article(s) with results of the trial

- Trial protocol
- Statistical analysis plan (SAP)
- Non-commercial trial registry record (e.g. ClinicalTrials.gov record)
- Company-owned trial registry record (e.g. GSK Clinical Study Register record)
- “Grey literature” (e.g. unpublished thesis)
- Conference abstract(s) about the trial
- Regulatory document (e.g. Clinical Study Report, Drug Approval Package)
- Research ethics application
- Grant database summary (e.g. NIH RePORTER or Research Councils UK Gateway to Research)
- Personal communication with trialist
- Personal communication with the sponsor

#### Risk of bias assessment

Responses underlined in green are potential markers for low risk of bias, and responses in **red** are potential markers for a risk of bias. Where questions relate only to sign posts to other questions, no formatting is used.

#### Domain 1: Risk of bias arising from the randomization process

| Signalling questions                                                                                       | Comments | Response options |
|------------------------------------------------------------------------------------------------------------|----------|------------------|
| 1.1 Was the allocation sequence random?                                                                    |          | <u>Y</u>         |
| 1.2 Was the allocation sequence concealed until participants were enrolled and assigned to interventions?  |          | <u>Y</u>         |
| 1.3 Did baseline differences between intervention groups suggest a problem with the randomization process? |          | <u>N</u>         |
| Risk-of-bias judgement                                                                                     |          | Low              |
| Optional: What is the predicted direction of bias arising from the randomization process?                  |          | Unpredictable    |

#### Domain 2: Risk of bias due to deviations from the intended interventions (*effect of assignment to intervention*)

| Signalling questions                                                                                                    | Comments | Response options |
|-------------------------------------------------------------------------------------------------------------------------|----------|------------------|
| 2.1. Were participants aware of their assigned intervention during the trial?                                           |          | <b>Y</b>         |
| 2.2. Were carers and people delivering the interventions aware of participants' assigned intervention during the trial? |          | <b>Y</b>         |

|                                                                                                                                                                               |  |               |
|-------------------------------------------------------------------------------------------------------------------------------------------------------------------------------|--|---------------|
| 2.3. If <u>Y/PY/NI</u> to 2.1 or 2.2: Were there deviations from the intended intervention that arose because of the trial context?                                           |  | Y             |
| 2.4 If <u>Y/PY</u> to 2.3: Were these deviations likely to have affected the outcome?                                                                                         |  | PY            |
| 2.5. If <u>Y/PY/NI</u> to 2.4: Were these deviations from intended intervention balanced between groups?                                                                      |  | Y             |
| 2.6 Was an appropriate analysis used to estimate the effect of assignment to intervention?                                                                                    |  | Y             |
| 2.7 If <u>N/PN/NI</u> to 2.6: Was there potential for a substantial impact (on the result) of the failure to analyse participants in the group to which they were randomized? |  | PY            |
| Risk-of-bias judgement                                                                                                                                                        |  | Some concerns |
| Optional: What is the predicted direction of bias due to deviations from intended interventions?                                                                              |  | Unpredictable |

Domain 2: Risk of bias due to deviations from the intended interventions (*effect of adhering to intervention*)

| Signalling questions                                                                                                                                     | Comments | Response options |
|----------------------------------------------------------------------------------------------------------------------------------------------------------|----------|------------------|
| 2.1. Were participants aware of their assigned intervention during the trial?                                                                            | N/A      | N/A              |
| 2.2. Were carers and people delivering the interventions aware of participants' assigned intervention during the trial?                                  |          | N/A              |
| 2.3. [If applicable:] If <u>Y/PY/NI</u> to 2.1 or 2.2: Were important non-protocol interventions balanced across intervention groups?                    | N/A      | N/A              |
| 2.4. [If applicable:] Were there failures in implementing the intervention that could have affected the outcome?                                         | N/A      | N/A              |
| 2.5. [If applicable:] Was there non-adherence to the assigned intervention regimen that could have affected participants' outcomes?                      | N/A      | Y                |
| 2.6. If <u>N/PN/NI</u> to 2.3, or <u>Y/PY/NI</u> to 2.4 or 2.5: Was an appropriate analysis used to estimate the effect of adhering to the intervention? | N/A      | N/A              |
| Risk-of-bias judgement                                                                                                                                   | N/A      | N/A              |
| Optional: What is the predicted direction of bias due to deviations from intended interventions?                                                         | N/A      | N/A              |

Domain 3: Missing outcome data

| Signalling questions                                                                      | Comments | Response options |
|-------------------------------------------------------------------------------------------|----------|------------------|
| 3.1 Were data for this outcome available for all, or nearly all, participants randomized? |          | Y                |

|                                                                                                         |     |     |
|---------------------------------------------------------------------------------------------------------|-----|-----|
| 3.2 If <b>N/PN/NI</b> to 3.1: Is there evidence that the result was not biased by missing outcome data? | N/A | N/A |
| 3.3 If <b>N/PN</b> to 3.2: Could missingness in the outcome depend on its true value?                   | N/A | N/A |
| 3.4 If <b>Y/PY/NI</b> to 3.3: Is it likely that missingness in the outcome depended on its true value?  |     | N/A |
| <b>Risk-of-bias judgement</b>                                                                           |     | Low |
| Optional: What is the predicted direction of bias due to missing outcome data?                          |     | NA  |

Domain 4: Risk of bias in measurement of the outcome

| Signalling questions                                                                                                            | Comments | Response options |
|---------------------------------------------------------------------------------------------------------------------------------|----------|------------------|
| 4.1 Was the method of measuring the outcome inappropriate?                                                                      |          | <u>N</u>         |
| 4.2 Could measurement or ascertainment of the outcome have differed between intervention groups?                                |          | <u>N</u>         |
| 4.3 If <u>N/PN/NI</u> to 4.1 and 4.2: Were outcome assessors aware of the intervention received by study participants?          |          | <u>PN</u>        |
| 4.4 If <u>Y/PY/NI</u> to 4.3: Could assessment of the outcome have been influenced by knowledge of intervention received?       |          | N/A              |
| 4.5 If <u>Y/PY/NI</u> to 4.4: Is it likely that assessment of the outcome was influenced by knowledge of intervention received? |          | N/A              |
| Risk-of-bias judgement                                                                                                          |          | Low              |
| Optional: What is the predicted direction of bias in measurement of the outcome?                                                |          | NA               |

Domain 5: Risk of bias in selection of the reported result

| Signalling questions                                                                                                                                                                | Comments | Response options |
|-------------------------------------------------------------------------------------------------------------------------------------------------------------------------------------|----------|------------------|
| 5.1 Were the data that produced this result analysed in accordance with a pre-specified analysis plan that was finalized before unblinded outcome data were available for analysis? |          | <u>PY</u>        |
| Is the numerical result being assessed likely to have been selected, on the basis of the results, from...                                                                           |          |                  |
| 5.2. ... multiple eligible outcome measurements (e.g. scales, definitions, time points) within the outcome domain?                                                                  |          | <u>N</u>         |
| 5.3 ... multiple eligible analyses of the data?                                                                                                                                     |          | <u>N</u>         |
| Risk-of-bias judgement                                                                                                                                                              |          | Low              |
| Optional: What is the predicted direction of bias due to selection of the reported result?                                                                                          |          | NA               |

Overall risk of bias

|                                                                             |  |     |
|-----------------------------------------------------------------------------|--|-----|
| Risk-of-bias judgement                                                      |  | Low |
| Optional: What is the overall predicted direction of bias for this outcome? |  | NA  |



## Study details

### Reference

Holm NR, Mäkikallio T, Lindsay MM, Spence MS, Erglis A, Menown IBA, et al. Percutaneous coronary angioplasty versus coronary artery bypass grafting in the treatment of unprotected left main stenosis: updated 5-year outcomes from the randomised, non-inferiority NOBLE trial. The Lancet. 2019

### Study design

- Individually-randomized parallel-group trial
- Cluster-randomized parallel-group trial
- Individually randomized cross-over (or other matched) trial

### For the purposes of this assessment, the interventions being compared are defined as

Experimental:  Comparator:

### Specify which outcome is being assessed for risk of bias

**Specify the numerical result being assessed.** In case of multiple alternative analyses being presented, specify the numeric result (e.g. RR = 1.52 (95% CI 0.83 to 2.77) and/or a reference (e.g. to a table, figure or paragraph) that uniquely defines the result being assessed.

### Is the review team's aim for this result...?

- to assess the effect of *assignment to intervention* (the 'intention-to-treat' effect)
- to assess the effect of *adhering to intervention* (the 'per-protocol' effect)

**If the aim is to assess the effect of *adhering to intervention***, select the deviations from intended intervention that should be addressed (at least one must be checked):

- occurrence of non-protocol interventions
- failures in implementing the intervention that could have affected the outcome
- non-adherence to their assigned intervention by trial participants

### Which of the following sources were obtained to help inform the risk-of-bias assessment? (tick as many as apply)

- Journal article(s) with results of the trial



- Trial protocol
- Statistical analysis plan (SAP)
- Non-commercial trial registry record (e.g. ClinicalTrials.gov record)
- Company-owned trial registry record (e.g. GSK Clinical Study Register record)
- “Grey literature” (e.g. unpublished thesis)
- Conference abstract(s) about the trial
- Regulatory document (e.g. Clinical Study Report, Drug Approval Package)
- Research ethics application
- Grant database summary (e.g. NIH RePORTER or Research Councils UK Gateway to Research)
- Personal communication with trialist
- Personal communication with the sponsor

Risk of bias assessment

Responses underlined in green are potential markers for low risk of bias, and responses in red are potential markers for a risk of bias. Where questions relate only to sign posts to other questions, no formatting is used.

Domain 1: Risk of bias arising from the randomization process

| Signalling questions                                                                                       | Comments | Response options |
|------------------------------------------------------------------------------------------------------------|----------|------------------|
| 1.1 Was the allocation sequence random?                                                                    |          | <u>Y</u>         |
| 1.2 Was the allocation sequence concealed until participants were enrolled and assigned to interventions?  |          | <u>Y</u>         |
| 1.3 Did baseline differences between intervention groups suggest a problem with the randomization process? |          | <u>N</u>         |
| Risk-of-bias judgement                                                                                     |          | Low              |
| Optional: What is the predicted direction of bias arising from the randomization process?                  |          | Unpredictable    |

Domain 2: Risk of bias due to deviations from the intended interventions (*effect of assignment to intervention*)

| Signalling questions                                                                                                    | Comments | Response options |
|-------------------------------------------------------------------------------------------------------------------------|----------|------------------|
| 2.1. Were participants aware of their assigned intervention during the trial?                                           |          | Y                |
| 2.2. Were carers and people delivering the interventions aware of participants' assigned intervention during the trial? |          | Y                |

|                                                                                                                                                                               |  |               |
|-------------------------------------------------------------------------------------------------------------------------------------------------------------------------------|--|---------------|
| 2.3. If <u>Y/PY/NI</u> to 2.1 or 2.2: Were there deviations from the intended intervention that arose because of the trial context?                                           |  | Y             |
| 2.4 If <u>Y/PY</u> to 2.3: Were these deviations likely to have affected the outcome?                                                                                         |  | PY            |
| 2.5. If <u>Y/PY/NI</u> to 2.4: Were these deviations from intended intervention balanced between groups?                                                                      |  | Y             |
| 2.6 Was an appropriate analysis used to estimate the effect of assignment to intervention?                                                                                    |  | Y             |
| 2.7 If <u>N/PN/NI</u> to 2.6: Was there potential for a substantial impact (on the result) of the failure to analyse participants in the group to which they were randomized? |  | PY            |
| Risk-of-bias judgement                                                                                                                                                        |  | Some concerns |
| Optional: What is the predicted direction of bias due to deviations from intended interventions?                                                                              |  | Unpredictable |

Domain 2: Risk of bias due to deviations from the intended interventions (*effect of adhering to intervention*)

| Signalling questions                                                                                                                                     | Comments | Response options |
|----------------------------------------------------------------------------------------------------------------------------------------------------------|----------|------------------|
| 2.1. Were participants aware of their assigned intervention during the trial?                                                                            | N/A      | N/A              |
| 2.2. Were carers and people delivering the interventions aware of participants' assigned intervention during the trial?                                  |          | N/A              |
| 2.3. [If applicable:] If <u>Y/PY/NI</u> to 2.1 or 2.2: Were important non-protocol interventions balanced across intervention groups?                    | N/A      | N/A              |
| 2.4. [If applicable:] Were there failures in implementing the intervention that could have affected the outcome?                                         | N/A      | N/A              |
| 2.5. [If applicable:] Was there non-adherence to the assigned intervention regimen that could have affected participants' outcomes?                      | N/A      | Y                |
| 2.6. If <u>N/PN/NI</u> to 2.3, or <u>Y/PY/NI</u> to 2.4 or 2.5: Was an appropriate analysis used to estimate the effect of adhering to the intervention? | N/A      | N/A              |
| Risk-of-bias judgement                                                                                                                                   | N/A      | N/A              |
| Optional: What is the predicted direction of bias due to deviations from intended interventions?                                                         | N/A      | N/A              |

Domain 3: Missing outcome data

| Signalling questions                                                                      | Comments | Response options |
|-------------------------------------------------------------------------------------------|----------|------------------|
| 3.1 Were data for this outcome available for all, or nearly all, participants randomized? |          | Y                |

|                                                                                                         |     |     |
|---------------------------------------------------------------------------------------------------------|-----|-----|
| 3.2 If <b>N/PN/NI</b> to 3.1: Is there evidence that the result was not biased by missing outcome data? | N/A | N/A |
| 3.3 If <b>N/PN</b> to 3.2: Could missingness in the outcome depend on its true value?                   | N/A | N/A |
| 3.4 If <b>Y/PY/NI</b> to 3.3: Is it likely that missingness in the outcome depended on its true value?  |     | N/A |
| <b>Risk-of-bias judgement</b>                                                                           |     | Low |
| Optional: What is the predicted direction of bias due to missing outcome data?                          |     | NA  |

Domain 4: Risk of bias in measurement of the outcome

| Signalling questions                                                                                                            | Comments | Response options |
|---------------------------------------------------------------------------------------------------------------------------------|----------|------------------|
| 4.1 Was the method of measuring the outcome inappropriate?                                                                      |          | <u>N</u>         |
| 4.2 Could measurement or ascertainment of the outcome have differed between intervention groups?                                |          | <u>N</u>         |
| 4.3 If <u>N/PN/NI</u> to 4.1 and 4.2: Were outcome assessors aware of the intervention received by study participants?          |          | <u>PN</u>        |
| 4.4 If <u>Y/PY/NI</u> to 4.3: Could assessment of the outcome have been influenced by knowledge of intervention received?       |          | N/A              |
| 4.5 If <u>Y/PY/NI</u> to 4.4: Is it likely that assessment of the outcome was influenced by knowledge of intervention received? |          | N/A              |
| Risk-of-bias judgement                                                                                                          |          | Low              |
| Optional: What is the predicted direction of bias in measurement of the outcome?                                                |          | NA               |

Domain 5: Risk of bias in selection of the reported result

| Signalling questions                                                                                                                                                                | Comments | Response options |
|-------------------------------------------------------------------------------------------------------------------------------------------------------------------------------------|----------|------------------|
| 5.1 Were the data that produced this result analysed in accordance with a pre-specified analysis plan that was finalized before unblinded outcome data were available for analysis? |          | <u>PY</u>        |
| Is the numerical result being assessed likely to have been selected, on the basis of the results, from...                                                                           |          |                  |
| 5.2. ... multiple eligible outcome measurements (e.g. scales, definitions, time points) within the outcome domain?                                                                  |          | <u>N</u>         |
| 5.3 ... multiple eligible analyses of the data?                                                                                                                                     |          | <u>N</u>         |
| Risk-of-bias judgement                                                                                                                                                              |          | Low              |
| Optional: What is the predicted direction of bias due to selection of the reported result?                                                                                          |          | NA               |

Overall risk of bias

|                                                                             |  |     |
|-----------------------------------------------------------------------------|--|-----|
| Risk-of-bias judgement                                                      |  | Low |
| Optional: What is the overall predicted direction of bias for this outcome? |  | NA  |



## Study details

### Reference

Cisowski M, Drzewiecki J, Drzewiecka-Gerber A, Jaklik A, Kruczak W, Szczeklik M, et al. Primary stenting versus MIDCAB: preliminary report—Comparision of two methods of revascularization in single left anterior descending coronary artery stenosis. *Ann Thorac Surg.* 2002 Oct;74(4):1334–9

## Study design

- Individually-randomized parallel-group trial
- Cluster-randomized parallel-group trial
- Individually randomized cross-over (or other matched) trial

## For the purposes of this assessment, the interventions being compared are defined as

Experimental:  Comparator:

## Specify which outcome is being assessed for risk of bias

**Specify the numerical result being assessed.** In case of multiple alternative analyses being presented, specify the numeric result (e.g. RR = 1.52 (95% CI 0.83 to 2.77) and/or a reference (e.g. to a table, figure or paragraph) that uniquely defines the result being assessed.

## Is the review team's aim for this result...?

- to assess the effect of *assignment to intervention* (the 'intention-to-treat' effect)
- to assess the effect of *adhering to intervention* (the 'per-protocol' effect)

**If the aim is to assess the effect of *adhering to intervention***, select the deviations from intended intervention that should be addressed (at least one must be checked):

- occurrence of non-protocol interventions
- failures in implementing the intervention that could have affected the outcome
- non-adherence to their assigned intervention by trial participants

## Which of the following sources were obtained to help inform the risk-of-bias assessment? (tick as many as apply)

- Journal article(s) with results of the trial

- Trial protocol
- Statistical analysis plan (SAP)
- Non-commercial trial registry record (e.g. ClinicalTrials.gov record)
- Company-owned trial registry record (e.g. GSK Clinical Study Register record)
- “Grey literature” (e.g. unpublished thesis)
- Conference abstract(s) about the trial
- Regulatory document (e.g. Clinical Study Report, Drug Approval Package)
- Research ethics application
- Grant database summary (e.g. NIH RePORTER or Research Councils UK Gateway to Research)
- Personal communication with trialist
- Personal communication with the sponsor

Risk of bias assessment

Responses underlined in green are potential markers for low risk of bias, and responses in red are potential markers for a risk of bias. Where questions relate only to sign posts to other questions, no formatting is used.

Domain 1: Risk of bias arising from the randomization process

| Signalling questions                                                                                       | Comments | Response options |
|------------------------------------------------------------------------------------------------------------|----------|------------------|
| 1.1 Was the allocation sequence random?                                                                    |          | <u>Y</u>         |
| 1.2 Was the allocation sequence concealed until participants were enrolled and assigned to interventions?  |          | <u>Y</u>         |
| 1.3 Did baseline differences between intervention groups suggest a problem with the randomization process? |          | <u>N</u>         |
| Risk-of-bias judgement                                                                                     |          | Low              |
| Optional: What is the predicted direction of bias arising from the randomization process?                  |          | Unpredictable    |

Domain 2: Risk of bias due to deviations from the intended interventions (*effect of assignment to intervention*)

| Signalling questions                                                                                                    | Comments | Response options |
|-------------------------------------------------------------------------------------------------------------------------|----------|------------------|
| 2.1. Were participants aware of their assigned intervention during the trial?                                           |          | Y                |
| 2.2. Were carers and people delivering the interventions aware of participants' assigned intervention during the trial? |          | Y                |

|                                                                                                                                                                               |  |               |
|-------------------------------------------------------------------------------------------------------------------------------------------------------------------------------|--|---------------|
| 2.3. If <u>Y/PY/NI</u> to 2.1 or 2.2: Were there deviations from the intended intervention that arose because of the trial context?                                           |  | Y             |
| 2.4 If <u>Y/PY</u> to 2.3: Were these deviations likely to have affected the outcome?                                                                                         |  | PY            |
| 2.5. If <u>Y/PY/NI</u> to 2.4: Were these deviations from intended intervention balanced between groups?                                                                      |  | Y             |
| 2.6 Was an appropriate analysis used to estimate the effect of assignment to intervention?                                                                                    |  | Y             |
| 2.7 If <u>N/PN/NI</u> to 2.6: Was there potential for a substantial impact (on the result) of the failure to analyse participants in the group to which they were randomized? |  | PY            |
| Risk-of-bias judgement                                                                                                                                                        |  | Some concerns |
| Optional: What is the predicted direction of bias due to deviations from intended interventions?                                                                              |  | Unpredictable |

Domain 2: Risk of bias due to deviations from the intended interventions (*effect of adhering to intervention*)

| Signalling questions                                                                                                                                     | Comments | Response options |
|----------------------------------------------------------------------------------------------------------------------------------------------------------|----------|------------------|
| 2.1. Were participants aware of their assigned intervention during the trial?                                                                            | N/A      | N/A              |
| 2.2. Were carers and people delivering the interventions aware of participants' assigned intervention during the trial?                                  |          | N/A              |
| 2.3. [If applicable:] If <u>Y/PY/NI</u> to 2.1 or 2.2: Were important non-protocol interventions balanced across intervention groups?                    | N/A      | N/A              |
| 2.4. [If applicable:] Were there failures in implementing the intervention that could have affected the outcome?                                         | N/A      | N/A              |
| 2.5. [If applicable:] Was there non-adherence to the assigned intervention regimen that could have affected participants' outcomes?                      | N/A      | Y                |
| 2.6. If <u>N/PN/NI</u> to 2.3, or <u>Y/PY/NI</u> to 2.4 or 2.5: Was an appropriate analysis used to estimate the effect of adhering to the intervention? | N/A      | N/A              |
| Risk-of-bias judgement                                                                                                                                   | N/A      | N/A              |
| Optional: What is the predicted direction of bias due to deviations from intended interventions?                                                         | N/A      | N/A              |

Domain 3: Missing outcome data

| Signalling questions                                                                      | Comments | Response options |
|-------------------------------------------------------------------------------------------|----------|------------------|
| 3.1 Were data for this outcome available for all, or nearly all, participants randomized? |          | Y                |



|                                                                                                         |     |     |
|---------------------------------------------------------------------------------------------------------|-----|-----|
| 3.2 If <b>N/PN/NI</b> to 3.1: Is there evidence that the result was not biased by missing outcome data? | N/A | N/A |
| 3.3 If <b>N/PN</b> to 3.2: Could missingness in the outcome depend on its true value?                   | N/A | N/A |
| 3.4 If <b>Y/PY/NI</b> to 3.3: Is it likely that missingness in the outcome depended on its true value?  |     | N/A |
| <b>Risk-of-bias judgement</b>                                                                           |     | Low |
| Optional: What is the predicted direction of bias due to missing outcome data?                          |     | NA  |

Domain 4: Risk of bias in measurement of the outcome

| Signalling questions                                                                                                            | Comments | Response options |
|---------------------------------------------------------------------------------------------------------------------------------|----------|------------------|
| 4.1 Was the method of measuring the outcome inappropriate?                                                                      |          | <u>N</u>         |
| 4.2 Could measurement or ascertainment of the outcome have differed between intervention groups?                                |          | <u>N</u>         |
| 4.3 If <u>N/PN/NI</u> to 4.1 and 4.2: Were outcome assessors aware of the intervention received by study participants?          |          | <u>PN</u>        |
| 4.4 If <u>Y/PY/NI</u> to 4.3: Could assessment of the outcome have been influenced by knowledge of intervention received?       |          | N/A              |
| 4.5 If <u>Y/PY/NI</u> to 4.4: Is it likely that assessment of the outcome was influenced by knowledge of intervention received? |          | N/A              |
| Risk-of-bias judgement                                                                                                          |          | Low              |
| Optional: What is the predicted direction of bias in measurement of the outcome?                                                |          | NA               |

Domain 5: Risk of bias in selection of the reported result

| Signalling questions                                                                                                                                                                | Comments | Response options |
|-------------------------------------------------------------------------------------------------------------------------------------------------------------------------------------|----------|------------------|
| 5.1 Were the data that produced this result analysed in accordance with a pre-specified analysis plan that was finalized before unblinded outcome data were available for analysis? |          | <u>PY</u>        |
| Is the numerical result being assessed likely to have been selected, on the basis of the results, from...                                                                           |          |                  |
| 5.2. ... multiple eligible outcome measurements (e.g. scales, definitions, time points) within the outcome domain?                                                                  |          | <u>N</u>         |
| 5.3 ... multiple eligible analyses of the data?                                                                                                                                     |          | <u>N</u>         |
| Risk-of-bias judgement                                                                                                                                                              |          | Low              |
| Optional: What is the predicted direction of bias due to selection of the reported result?                                                                                          |          | NA               |

Overall risk of bias

|                                                                             |  |     |
|-----------------------------------------------------------------------------|--|-----|
| Risk-of-bias judgement                                                      |  | Low |
| Optional: What is the overall predicted direction of bias for this outcome? |  | NA  |



**Study details**

**Reference**

SoS Investigators. Coronary artery bypass surgery versus percutaneous coronary intervention with stent implantation in patients with multivessel coronary artery disease (the Stent or Surgery trial): a randomised controlled trial. Lancet Lond Engl. 2002 Sep 28;360(9338):965–70.

**Study design**

- Individually-randomized parallel-group trial
- Cluster-randomized parallel-group trial
- Individually randomized cross-over (or other matched) trial

**For the purposes of this assessment, the interventions being compared are defined as**

Experimental:  Comparator:

**Specify which outcome is being assessed for risk of bias**

**Specify the numerical result being assessed.** In case of multiple alternative analyses being presented, specify the numeric result (e.g. RR = 1.52 (95% CI 0.83 to 2.77) and/or a reference (e.g. to a table, figure or paragraph) that uniquely defines the result being assessed.

**Is the review team’s aim for this result...?**

- to assess the effect of *assignment to intervention* (the ‘intention-to-treat’ effect)
- to assess the effect of *adhering to intervention* (the ‘per-protocol’ effect)

**If the aim is to assess the effect of *adhering to intervention*, select the deviations from intended intervention that should be addressed (at least one must be checked):**

- occurrence of non-protocol interventions
- failures in implementing the intervention that could have affected the outcome
- non-adherence to their assigned intervention by trial participants

**Which of the following sources were obtained to help inform the risk-of-bias assessment? (tick as many as apply)**

- Journal article(s) with results of the trial

- Trial protocol
- Statistical analysis plan (SAP)
- Non-commercial trial registry record (e.g. ClinicalTrials.gov record)
- Company-owned trial registry record (e.g. GSK Clinical Study Register record)
- “Grey literature” (e.g. unpublished thesis)
- Conference abstract(s) about the trial
- Regulatory document (e.g. Clinical Study Report, Drug Approval Package)
- Research ethics application
- Grant database summary (e.g. NIH RePORTER or Research Councils UK Gateway to Research)
- Personal communication with trialist
- Personal communication with the sponsor

#### Risk of bias assessment

Responses underlined in green are potential markers for low risk of bias, and responses in **red** are potential markers for a risk of bias. Where questions relate only to sign posts to other questions, no formatting is used.

#### Domain 1: Risk of bias arising from the randomization process

| Signalling questions                                                                                       | Comments | Response options |
|------------------------------------------------------------------------------------------------------------|----------|------------------|
| 1.1 Was the allocation sequence random?                                                                    |          | <u>Y</u>         |
| 1.2 Was the allocation sequence concealed until participants were enrolled and assigned to interventions?  |          | <u>Y</u>         |
| 1.3 Did baseline differences between intervention groups suggest a problem with the randomization process? |          | <u>N</u>         |
| Risk-of-bias judgement                                                                                     |          | Low              |
| Optional: What is the predicted direction of bias arising from the randomization process?                  |          | Unpredictable    |

#### Domain 2: Risk of bias due to deviations from the intended interventions (*effect of assignment to intervention*)

| Signalling questions                                                                                                    | Comments | Response options |
|-------------------------------------------------------------------------------------------------------------------------|----------|------------------|
| 2.1. Were participants aware of their assigned intervention during the trial?                                           |          | <b>Y</b>         |
| 2.2. Were carers and people delivering the interventions aware of participants' assigned intervention during the trial? |          | <b>Y</b>         |

|                                                                                                                                                                               |  |               |
|-------------------------------------------------------------------------------------------------------------------------------------------------------------------------------|--|---------------|
| 2.3. If <u>Y/PY/NI</u> to 2.1 or 2.2: Were there deviations from the intended intervention that arose because of the trial context?                                           |  | Y             |
| 2.4 If <u>Y/PY</u> to 2.3: Were these deviations likely to have affected the outcome?                                                                                         |  | PY            |
| 2.5. If <u>Y/PY/NI</u> to 2.4: Were these deviations from intended intervention balanced between groups?                                                                      |  | Y             |
| 2.6 Was an appropriate analysis used to estimate the effect of assignment to intervention?                                                                                    |  | Y             |
| 2.7 If <u>N/PN/NI</u> to 2.6: Was there potential for a substantial impact (on the result) of the failure to analyse participants in the group to which they were randomized? |  | PY            |
| Risk-of-bias judgement                                                                                                                                                        |  | Some concerns |
| Optional: What is the predicted direction of bias due to deviations from intended interventions?                                                                              |  | Unpredictable |

Domain 2: Risk of bias due to deviations from the intended interventions (*effect of adhering to intervention*)

| Signalling questions                                                                                                                                     | Comments | Response options |
|----------------------------------------------------------------------------------------------------------------------------------------------------------|----------|------------------|
| 2.1. Were participants aware of their assigned intervention during the trial?                                                                            | N/A      | N/A              |
| 2.2. Were carers and people delivering the interventions aware of participants' assigned intervention during the trial?                                  |          | N/A              |
| 2.3. [If applicable:] If <u>Y/PY/NI</u> to 2.1 or 2.2: Were important non-protocol interventions balanced across intervention groups?                    | N/A      | N/A              |
| 2.4. [If applicable:] Were there failures in implementing the intervention that could have affected the outcome?                                         | N/A      | N/A              |
| 2.5. [If applicable:] Was there non-adherence to the assigned intervention regimen that could have affected participants' outcomes?                      | N/A      | Y                |
| 2.6. If <u>N/PN/NI</u> to 2.3, or <u>Y/PY/NI</u> to 2.4 or 2.5: Was an appropriate analysis used to estimate the effect of adhering to the intervention? | N/A      | N/A              |
| Risk-of-bias judgement                                                                                                                                   | N/A      | N/A              |
| Optional: What is the predicted direction of bias due to deviations from intended interventions?                                                         | N/A      | N/A              |

Domain 3: Missing outcome data

| Signalling questions                                                                      | Comments | Response options |
|-------------------------------------------------------------------------------------------|----------|------------------|
| 3.1 Were data for this outcome available for all, or nearly all, participants randomized? |          | Y                |

|                                                                                                         |     |     |
|---------------------------------------------------------------------------------------------------------|-----|-----|
| 3.2 If <b>N/PN/NI</b> to 3.1: Is there evidence that the result was not biased by missing outcome data? | N/A | N/A |
| 3.3 If <b>N/PN</b> to 3.2: Could missingness in the outcome depend on its true value?                   | N/A | N/A |
| 3.4 If <b>Y/PY/NI</b> to 3.3: Is it likely that missingness in the outcome depended on its true value?  |     | N/A |
| <b>Risk-of-bias judgement</b>                                                                           |     | Low |
| Optional: What is the predicted direction of bias due to missing outcome data?                          |     | NA  |

Domain 4: Risk of bias in measurement of the outcome

| Signalling questions                                                                                                            | Comments | Response options |
|---------------------------------------------------------------------------------------------------------------------------------|----------|------------------|
| 4.1 Was the method of measuring the outcome inappropriate?                                                                      |          | <u>N</u>         |
| 4.2 Could measurement or ascertainment of the outcome have differed between intervention groups?                                |          | <u>N</u>         |
| 4.3 If <u>N/PN/NI</u> to 4.1 and 4.2: Were outcome assessors aware of the intervention received by study participants?          |          | <u>PN</u>        |
| 4.4 If <u>Y/PY/NI</u> to 4.3: Could assessment of the outcome have been influenced by knowledge of intervention received?       |          | N/A              |
| 4.5 If <u>Y/PY/NI</u> to 4.4: Is it likely that assessment of the outcome was influenced by knowledge of intervention received? |          | N/A              |
| Risk-of-bias judgement                                                                                                          |          | Low              |
| Optional: What is the predicted direction of bias in measurement of the outcome?                                                |          | NA               |

Domain 5: Risk of bias in selection of the reported result

| Signalling questions                                                                                                                                                                | Comments | Response options |
|-------------------------------------------------------------------------------------------------------------------------------------------------------------------------------------|----------|------------------|
| 5.1 Were the data that produced this result analysed in accordance with a pre-specified analysis plan that was finalized before unblinded outcome data were available for analysis? |          | <u>PY</u>        |
| Is the numerical result being assessed likely to have been selected, on the basis of the results, from...                                                                           |          |                  |
| 5.2. ... multiple eligible outcome measurements (e.g. scales, definitions, time points) within the outcome domain?                                                                  |          | <u>N</u>         |
| 5.3 ... multiple eligible analyses of the data?                                                                                                                                     |          | <u>N</u>         |
| Risk-of-bias judgement                                                                                                                                                              |          | Low              |
| Optional: What is the predicted direction of bias due to selection of the reported result?                                                                                          |          | NA               |

Overall risk of bias

|                                                                             |  |     |
|-----------------------------------------------------------------------------|--|-----|
| Risk-of-bias judgement                                                      |  | Low |
| Optional: What is the overall predicted direction of bias for this outcome? |  | NA  |





**Study details**

**Reference**

Mohr FW, Morice M-C, Kappetein AP, Feldman TE, Ståhle E, Colombo A, et al. Coronary artery bypass graft surgery versus percutaneous coronary intervention in patients with three-vessel disease and left main coronary disease: 5-year follow-up of the randomised, clinical SYNTAX trial. *The Lancet*. 2013 Feb;381(9867):629–38.

**Study design**

- Individually-randomized parallel-group trial
- Cluster-randomized parallel-group trial
- Individually randomized cross-over (or other matched) trial

**For the purposes of this assessment, the interventions being compared are defined as**

Experimental:  Comparator:

**Specify which outcome is being assessed for risk of bias**

**Specify the numerical result being assessed.** In case of multiple alternative analyses being presented, specify the numeric result (e.g. RR = 1.52 (95% CI 0.83 to 2.77) and/or a reference (e.g. to a table, figure or paragraph) that uniquely defines the result being assessed.

**Is the review team’s aim for this result...?**

- to assess the effect of *assignment to intervention* (the ‘intention-to-treat’ effect)
- to assess the effect of *adhering to intervention* (the ‘per-protocol’ effect)

**If the aim is to assess the effect of *adhering to intervention*, select the deviations from intended intervention that should be addressed (at least one must be checked):**

- occurrence of non-protocol interventions
- failures in implementing the intervention that could have affected the outcome
- non-adherence to their assigned intervention by trial participants

**Which of the following sources were obtained to help inform the risk-of-bias assessment? (tick as many as apply)**

- Journal article(s) with results of the trial

- Trial protocol
- Statistical analysis plan (SAP)
- Non-commercial trial registry record (e.g. ClinicalTrials.gov record)
- Company-owned trial registry record (e.g. GSK Clinical Study Register record)
- “Grey literature” (e.g. unpublished thesis)
- Conference abstract(s) about the trial
- Regulatory document (e.g. Clinical Study Report, Drug Approval Package)
- Research ethics application
- Grant database summary (e.g. NIH RePORTER or Research Councils UK Gateway to Research)
- Personal communication with trialist
- Personal communication with the sponsor

#### Risk of bias assessment

Responses underlined in green are potential markers for low risk of bias, and responses in red are potential markers for a risk of bias. Where questions relate only to sign posts to other questions, no formatting is used.

#### Domain 1: Risk of bias arising from the randomization process

| Signalling questions                                                                                       | Comments | Response options |
|------------------------------------------------------------------------------------------------------------|----------|------------------|
| 1.1 Was the allocation sequence random?                                                                    |          | <u>Y</u>         |
| 1.2 Was the allocation sequence concealed until participants were enrolled and assigned to interventions?  |          | <u>Y</u>         |
| 1.3 Did baseline differences between intervention groups suggest a problem with the randomization process? |          | <u>N</u>         |
| Risk-of-bias judgement                                                                                     |          | Low              |
| Optional: What is the predicted direction of bias arising from the randomization process?                  |          | Unpredictable    |

#### Domain 2: Risk of bias due to deviations from the intended interventions (*effect of assignment to intervention*)

| Signalling questions                                                                                                    | Comments | Response options |
|-------------------------------------------------------------------------------------------------------------------------|----------|------------------|
| 2.1. Were participants aware of their assigned intervention during the trial?                                           |          | Y                |
| 2.2. Were carers and people delivering the interventions aware of participants' assigned intervention during the trial? |          | Y                |

|                                                                                                                                                                               |  |               |
|-------------------------------------------------------------------------------------------------------------------------------------------------------------------------------|--|---------------|
| 2.3. If <u>Y/PY/NI</u> to 2.1 or 2.2: Were there deviations from the intended intervention that arose because of the trial context?                                           |  | Y             |
| 2.4 If <u>Y/PY</u> to 2.3: Were these deviations likely to have affected the outcome?                                                                                         |  | PY            |
| 2.5. If <u>Y/PY/NI</u> to 2.4: Were these deviations from intended intervention balanced between groups?                                                                      |  | Y             |
| 2.6 Was an appropriate analysis used to estimate the effect of assignment to intervention?                                                                                    |  | Y             |
| 2.7 If <u>N/PN/NI</u> to 2.6: Was there potential for a substantial impact (on the result) of the failure to analyse participants in the group to which they were randomized? |  | PY            |
| Risk-of-bias judgement                                                                                                                                                        |  | Some concerns |
| Optional: What is the predicted direction of bias due to deviations from intended interventions?                                                                              |  | Unpredictable |

Domain 2: Risk of bias due to deviations from the intended interventions (*effect of adhering to intervention*)

| Signalling questions                                                                                                                                     | Comments | Response options |
|----------------------------------------------------------------------------------------------------------------------------------------------------------|----------|------------------|
| 2.1. Were participants aware of their assigned intervention during the trial?                                                                            | N/A      | N/A              |
| 2.2. Were carers and people delivering the interventions aware of participants' assigned intervention during the trial?                                  |          | N/A              |
| 2.3. [If applicable:] If <u>Y/PY/NI</u> to 2.1 or 2.2: Were important non-protocol interventions balanced across intervention groups?                    | N/A      | N/A              |
| 2.4. [If applicable:] Were there failures in implementing the intervention that could have affected the outcome?                                         | N/A      | N/A              |
| 2.5. [If applicable:] Was there non-adherence to the assigned intervention regimen that could have affected participants' outcomes?                      | N/A      | Y                |
| 2.6. If <u>N/PN/NI</u> to 2.3, or <u>Y/PY/NI</u> to 2.4 or 2.5: Was an appropriate analysis used to estimate the effect of adhering to the intervention? | N/A      | N/A              |
| Risk-of-bias judgement                                                                                                                                   | N/A      | N/A              |
| Optional: What is the predicted direction of bias due to deviations from intended interventions?                                                         | N/A      | N/A              |

Domain 3: Missing outcome data

| Signalling questions                                                                      | Comments | Response options |
|-------------------------------------------------------------------------------------------|----------|------------------|
| 3.1 Were data for this outcome available for all, or nearly all, participants randomized? |          | Y                |

|                                                                                                         |     |     |
|---------------------------------------------------------------------------------------------------------|-----|-----|
| 3.2 If <b>N/PN/NI</b> to 3.1: Is there evidence that the result was not biased by missing outcome data? | N/A | N/A |
| 3.3 If <b>N/PN</b> to 3.2: Could missingness in the outcome depend on its true value?                   | N/A | N/A |
| 3.4 If <b>Y/PY/NI</b> to 3.3: Is it likely that missingness in the outcome depended on its true value?  |     | N/A |
| <b>Risk-of-bias judgement</b>                                                                           |     | Low |
| Optional: What is the predicted direction of bias due to missing outcome data?                          |     | NA  |

Domain 4: Risk of bias in measurement of the outcome

| Signalling questions                                                                                                            | Comments | Response options |
|---------------------------------------------------------------------------------------------------------------------------------|----------|------------------|
| 4.1 Was the method of measuring the outcome inappropriate?                                                                      |          | <u>N</u>         |
| 4.2 Could measurement or ascertainment of the outcome have differed between intervention groups?                                |          | <u>N</u>         |
| 4.3 If <u>N/PN/NI</u> to 4.1 and 4.2: Were outcome assessors aware of the intervention received by study participants?          |          | <u>PN</u>        |
| 4.4 If <u>Y/PY/NI</u> to 4.3: Could assessment of the outcome have been influenced by knowledge of intervention received?       |          | N/A              |
| 4.5 If <u>Y/PY/NI</u> to 4.4: Is it likely that assessment of the outcome was influenced by knowledge of intervention received? |          | N/A              |
| Risk-of-bias judgement                                                                                                          |          | Low              |
| Optional: What is the predicted direction of bias in measurement of the outcome?                                                |          | NA               |

Domain 5: Risk of bias in selection of the reported result

| Signalling questions                                                                                                                                                                | Comments | Response options |
|-------------------------------------------------------------------------------------------------------------------------------------------------------------------------------------|----------|------------------|
| 5.1 Were the data that produced this result analysed in accordance with a pre-specified analysis plan that was finalized before unblinded outcome data were available for analysis? |          | <u>PY</u>        |
| Is the numerical result being assessed likely to have been selected, on the basis of the results, from...                                                                           |          |                  |
| 5.2. ... multiple eligible outcome measurements (e.g. scales, definitions, time points) within the outcome domain?                                                                  |          | <u>N</u>         |
| 5.3 ... multiple eligible analyses of the data?                                                                                                                                     |          | <u>N</u>         |
| Risk-of-bias judgement                                                                                                                                                              |          | Low              |
| Optional: What is the predicted direction of bias due to selection of the reported result?                                                                                          |          | NA               |

Overall risk of bias

|                                                                             |  |     |
|-----------------------------------------------------------------------------|--|-----|
| Risk-of-bias judgement                                                      |  | Low |
| Optional: What is the overall predicted direction of bias for this outcome? |  | NA  |



**Study details**

**Reference**

Kamalesh M, Sharp TG, Tang XC, Shunk K, Ward HB, Walsh J, et al. Percutaneous coronary intervention versus coronary bypass surgery in United States veterans with diabetes. J Am Coll Cardiol. 2013 Feb 26;61(8):808–16.

**Study design**

- Individually-randomized parallel-group trial
- Cluster-randomized parallel-group trial
- Individually randomized cross-over (or other matched) trial

**For the purposes of this assessment, the interventions being compared are defined as**

Experimental:  Comparator:

**Specify which outcome is being assessed for risk of bias**

**Specify the numerical result being assessed.** In case of multiple alternative analyses being presented, specify the numeric result (e.g. RR = 1.52 (95% CI 0.83 to 2.77) and/or a reference (e.g. to a table, figure or paragraph) that uniquely defines the result being assessed.

**Is the review team’s aim for this result...?**

- to assess the effect of *assignment to intervention* (the ‘intention-to-treat’ effect)
- to assess the effect of *adhering to intervention* (the ‘per-protocol’ effect)

**If the aim is to assess the effect of *adhering to intervention***, select the deviations from intended intervention that should be addressed (at least one must be checked):

- occurrence of non-protocol interventions
- failures in implementing the intervention that could have affected the outcome
- non-adherence to their assigned intervention by trial participants

**Which of the following sources were obtained to help inform the risk-of-bias assessment? (tick as many as apply)**

- Journal article(s) with results of the trial



- Trial protocol
- Statistical analysis plan (SAP)
- Non-commercial trial registry record (e.g. ClinicalTrials.gov record)
- Company-owned trial registry record (e.g. GSK Clinical Study Register record)
- “Grey literature” (e.g. unpublished thesis)
- Conference abstract(s) about the trial
- Regulatory document (e.g. Clinical Study Report, Drug Approval Package)
- Research ethics application
- Grant database summary (e.g. NIH RePORTER or Research Councils UK Gateway to Research)
- Personal communication with trialist
- Personal communication with the sponsor

Risk of bias assessment

Responses underlined in green are potential markers for low risk of bias, and responses in red are potential markers for a risk of bias. Where questions relate only to sign posts to other questions, no formatting is used.

Domain 1: Risk of bias arising from the randomization process

| Signalling questions                                                                                       | Comments | Response options |
|------------------------------------------------------------------------------------------------------------|----------|------------------|
| 1.1 Was the allocation sequence random?                                                                    |          | <u>Y</u>         |
| 1.2 Was the allocation sequence concealed until participants were enrolled and assigned to interventions?  |          | <u>Y</u>         |
| 1.3 Did baseline differences between intervention groups suggest a problem with the randomization process? |          | <u>N</u>         |
| Risk-of-bias judgement                                                                                     |          | Low              |
| Optional: What is the predicted direction of bias arising from the randomization process?                  |          | Unpredictable    |

Domain 2: Risk of bias due to deviations from the intended interventions (*effect of assignment to intervention*)

| Signalling questions                                                                                                    | Comments | Response options |
|-------------------------------------------------------------------------------------------------------------------------|----------|------------------|
| 2.1. Were participants aware of their assigned intervention during the trial?                                           |          | Y                |
| 2.2. Were carers and people delivering the interventions aware of participants' assigned intervention during the trial? |          | Y                |

|                                                                                                                                                                               |  |               |
|-------------------------------------------------------------------------------------------------------------------------------------------------------------------------------|--|---------------|
| 2.3. If <u>Y/PY/NI</u> to 2.1 or 2.2: Were there deviations from the intended intervention that arose because of the trial context?                                           |  | Y             |
| 2.4 If <u>Y/PY</u> to 2.3: Were these deviations likely to have affected the outcome?                                                                                         |  | PY            |
| 2.5. If <u>Y/PY/NI</u> to 2.4: Were these deviations from intended intervention balanced between groups?                                                                      |  | Y             |
| 2.6 Was an appropriate analysis used to estimate the effect of assignment to intervention?                                                                                    |  | Y             |
| 2.7 If <u>N/PN/NI</u> to 2.6: Was there potential for a substantial impact (on the result) of the failure to analyse participants in the group to which they were randomized? |  | PY            |
| Risk-of-bias judgement                                                                                                                                                        |  | Some concerns |
| Optional: What is the predicted direction of bias due to deviations from intended interventions?                                                                              |  | Unpredictable |

Domain 2: Risk of bias due to deviations from the intended interventions (*effect of adhering to intervention*)

| Signalling questions                                                                                                                                     | Comments | Response options |
|----------------------------------------------------------------------------------------------------------------------------------------------------------|----------|------------------|
| 2.1. Were participants aware of their assigned intervention during the trial?                                                                            | N/A      | N/A              |
| 2.2. Were carers and people delivering the interventions aware of participants' assigned intervention during the trial?                                  |          | N/A              |
| 2.3. [If applicable:] If <u>Y/PY/NI</u> to 2.1 or 2.2: Were important non-protocol interventions balanced across intervention groups?                    | N/A      | N/A              |
| 2.4. [If applicable:] Were there failures in implementing the intervention that could have affected the outcome?                                         | N/A      | N/A              |
| 2.5. [If applicable:] Was there non-adherence to the assigned intervention regimen that could have affected participants' outcomes?                      | N/A      | Y                |
| 2.6. If <u>N/PN/NI</u> to 2.3, or <u>Y/PY/NI</u> to 2.4 or 2.5: Was an appropriate analysis used to estimate the effect of adhering to the intervention? | N/A      | N/A              |
| Risk-of-bias judgement                                                                                                                                   | N/A      | N/A              |
| Optional: What is the predicted direction of bias due to deviations from intended interventions?                                                         | N/A      | N/A              |

Domain 3: Missing outcome data

| Signalling questions                                                                      | Comments | Response options |
|-------------------------------------------------------------------------------------------|----------|------------------|
| 3.1 Were data for this outcome available for all, or nearly all, participants randomized? |          | Y                |

|                                                                                                         |     |     |
|---------------------------------------------------------------------------------------------------------|-----|-----|
| 3.2 If <b>N/PN/NI</b> to 3.1: Is there evidence that the result was not biased by missing outcome data? | N/A | N/A |
| 3.3 If <b>N/PN</b> to 3.2: Could missingness in the outcome depend on its true value?                   | N/A | N/A |
| 3.4 If <b>Y/PY/NI</b> to 3.3: Is it likely that missingness in the outcome depended on its true value?  |     | N/A |
| <b>Risk-of-bias judgement</b>                                                                           |     | Low |
| Optional: What is the predicted direction of bias due to missing outcome data?                          |     | NA  |

Domain 4: Risk of bias in measurement of the outcome

| Signalling questions                                                                                                            | Comments | Response options |
|---------------------------------------------------------------------------------------------------------------------------------|----------|------------------|
| 4.1 Was the method of measuring the outcome inappropriate?                                                                      |          | <u>N</u>         |
| 4.2 Could measurement or ascertainment of the outcome have differed between intervention groups?                                |          | <u>N</u>         |
| 4.3 If <u>N/PN/NI</u> to 4.1 and 4.2: Were outcome assessors aware of the intervention received by study participants?          |          | <u>PN</u>        |
| 4.4 If <u>Y/PY/NI</u> to 4.3: Could assessment of the outcome have been influenced by knowledge of intervention received?       |          | N/A              |
| 4.5 If <u>Y/PY/NI</u> to 4.4: Is it likely that assessment of the outcome was influenced by knowledge of intervention received? |          | N/A              |
| Risk-of-bias judgement                                                                                                          |          | Low              |
| Optional: What is the predicted direction of bias in measurement of the outcome?                                                |          | NA               |

Domain 5: Risk of bias in selection of the reported result

| Signalling questions                                                                                                                                                                | Comments | Response options |
|-------------------------------------------------------------------------------------------------------------------------------------------------------------------------------------|----------|------------------|
| 5.1 Were the data that produced this result analysed in accordance with a pre-specified analysis plan that was finalized before unblinded outcome data were available for analysis? |          | <u>PY</u>        |
| Is the numerical result being assessed likely to have been selected, on the basis of the results, from...                                                                           |          |                  |
| 5.2. ... multiple eligible outcome measurements (e.g. scales, definitions, time points) within the outcome domain?                                                                  |          | <u>N</u>         |
| 5.3 ... multiple eligible analyses of the data?                                                                                                                                     |          | <u>N</u>         |
| Risk-of-bias judgement                                                                                                                                                              |          | Low              |
| Optional: What is the predicted direction of bias due to selection of the reported result?                                                                                          |          | NA               |

Overall risk of bias

|                                                                             |  |     |
|-----------------------------------------------------------------------------|--|-----|
| Risk-of-bias judgement                                                      |  | Low |
| Optional: What is the overall predicted direction of bias for this outcome? |  | NA  |



## Study details

### Reference

Serruys PW, Ong ATL, van Herwerden LA, Sousa JE, Jatene A, Bonnier JJRM, et al. Five-Year Outcomes of Percutaneous Coronary Intervention Versus Coronary Artery Bypass Grafting for the Treatment of Multivessel Disease. *J Am Coll Cardiol*. 2018;71:1034-1044.

### Study design

- Individually-randomized parallel-group trial
- Cluster-randomized parallel-group trial
- Individually randomized cross-over (or other matched) trial

### For the purposes of this assessment, the interventions being compared are defined as

Experimental:  Comparator:

### Specify which outcome is being assessed for risk of bias

**Specify the numerical result being assessed.** In case of multiple alternative analyses being presented, specify the numeric result (e.g. RR = 1.52 (95% CI 0.83 to 2.77) and/or a reference (e.g. to a table, figure or paragraph) that uniquely defines the result being assessed.

### Is the review team's aim for this result...?

- to assess the effect of *assignment to intervention* (the 'intention-to-treat' effect)
- to assess the effect of *adhering to intervention* (the 'per-protocol' effect)

**If the aim is to assess the effect of *adhering to intervention***, select the deviations from intended intervention that should be addressed (at least one must be checked):

- occurrence of non-protocol interventions
- failures in implementing the intervention that could have affected the outcome
- non-adherence to their assigned intervention by trial participants

### Which of the following sources were obtained to help inform the risk-of-bias assessment? (tick as many as apply)

- Journal article(s) with results of the trial
- Trial protocol
- Statistical analysis plan (SAP)
- Non-commercial trial registry record (e.g. ClinicalTrials.gov record)
- Company-owned trial registry record (e.g. GSK Clinical Study Register record)
- "Grey literature" (e.g. unpublished thesis)
- Conference abstract(s) about the trial
- Regulatory document (e.g. Clinical Study Report, Drug Approval Package)
- Research ethics application
- Grant database summary (e.g. NIH RePORTER or Research Councils UK Gateway to Research)
- Personal communication with trialist
- Personal communication with the sponsor

Risk of bias assessment

Responses underlined in green are potential markers for low risk of bias, and responses in red are potential markers for a risk of bias. Where questions relate only to sign posts to other questions, no formatting is used.

Domain 1: Risk of bias arising from the randomization process

| Signalling questions                                                                                       | Comments | Response options |
|------------------------------------------------------------------------------------------------------------|----------|------------------|
| 1.1 Was the allocation sequence random?                                                                    |          | <u>Y</u>         |
| 1.2 Was the allocation sequence concealed until participants were enrolled and assigned to interventions?  |          | <u>Y</u>         |
| 1.3 Did baseline differences between intervention groups suggest a problem with the randomization process? |          | <u>N</u>         |
| Risk-of-bias judgement                                                                                     |          | Low              |
| Optional: What is the predicted direction of bias arising from the randomization process?                  |          | Unpredictable    |

Domain 2: Risk of bias due to deviations from the intended interventions (*effect of assignment to intervention*)

| Signalling questions                                                                                                                                                          | Comments | Response options |
|-------------------------------------------------------------------------------------------------------------------------------------------------------------------------------|----------|------------------|
| 2.1. Were participants aware of their assigned intervention during the trial?                                                                                                 |          | Y                |
| 2.2. Were carers and people delivering the interventions aware of participants' assigned intervention during the trial?                                                       |          | Y                |
| 2.3. If <u>Y/PY/NI</u> to 2.1 or 2.2: Were there deviations from the intended intervention that arose because of the trial context?                                           |          | Y                |
| 2.4 If <u>Y/PY</u> to 2.3: Were these deviations likely to have affected the outcome?                                                                                         |          | <u>PY</u>        |
| 2.5. If <u>Y/PY/NI</u> to 2.4: Were these deviations from intended intervention balanced between groups?                                                                      |          | <u>Y</u>         |
| 2.6 Was an appropriate analysis used to estimate the effect of assignment to intervention?                                                                                    |          | <u>Y</u>         |
| 2.7 If <u>N/PN/NI</u> to 2.6: Was there potential for a substantial impact (on the result) of the failure to analyse participants in the group to which they were randomized? |          | PY               |
| Risk-of-bias judgement                                                                                                                                                        |          | Some concerns    |
| Optional: What is the predicted direction of bias due to deviations from intended interventions?                                                                              |          | Unpredictable    |

Domain 2: Risk of bias due to deviations from the intended interventions (*effect of adhering to intervention*)

| Signalling questions                                                          | Comments | Response options |
|-------------------------------------------------------------------------------|----------|------------------|
| 2.1. Were participants aware of their assigned intervention during the trial? | N/A      | N/A              |

|                                                                                                                                                    |     |     |
|----------------------------------------------------------------------------------------------------------------------------------------------------|-----|-----|
| 2.2. Were carers and people delivering the interventions aware of participants' assigned intervention during the trial?                            |     | N/A |
| 2.3. [If applicable:] <u>If Y/PY/NI to 2.1 or 2.2</u> : Were important non-protocol interventions balanced across intervention groups?             | N/A | N/A |
| 2.4. [If applicable:] Were there failures in implementing the intervention that could have affected the outcome?                                   | N/A | N/A |
| 2.5. [If applicable:] Was there non-adherence to the assigned intervention regimen that could have affected participants' outcomes?                | N/A | Y   |
| 2.6. <u>If N/PN/NI to 2.3, or Y/PY/NI to 2.4 or 2.5</u> : Was an appropriate analysis used to estimate the effect of adhering to the intervention? | N/A | N/A |
| Risk-of-bias judgement                                                                                                                             | N/A | N/A |
| Optional: What is the predicted direction of bias due to deviations from intended interventions?                                                   | N/A | N/A |

Domain 3: Missing outcome data

| Signalling questions                                                                                     | Comments | Response options |
|----------------------------------------------------------------------------------------------------------|----------|------------------|
| 3.1 Were data for this outcome available for all, or nearly all, participants randomized?                |          | Y                |
| 3.2 <u>If N/PN/NI to 3.1</u> : Is there evidence that the result was not biased by missing outcome data? | N/A      | N/A              |
| 3.3 <u>If N/PN to 3.2</u> : Could missingness in the outcome depend on its true value?                   | N/A      | N/A              |
| 3.4 <u>If Y/PY/NI to 3.3</u> : Is it likely that missingness in the outcome depended on its true value?  |          | N/A              |
| Risk-of-bias judgement                                                                                   |          | Low              |
| Optional: What is the predicted direction of bias due to missing outcome data?                           |          | NA               |



Domain 4: Risk of bias in measurement of the outcome

| Signalling questions                                                                                                            | Comments | Response options |
|---------------------------------------------------------------------------------------------------------------------------------|----------|------------------|
| 4.1 Was the method of measuring the outcome inappropriate?                                                                      |          | <u>N</u>         |
| 4.2 Could measurement or ascertainment of the outcome have differed between intervention groups?                                |          | <u>N</u>         |
| 4.3 If <u>N/PN/NI</u> to 4.1 and 4.2: Were outcome assessors aware of the intervention received by study participants?          |          | <u>PN</u>        |
| 4.4 If <u>Y/PY/NI</u> to 4.3: Could assessment of the outcome have been influenced by knowledge of intervention received?       |          | N/A              |
| 4.5 If <u>Y/PY/NI</u> to 4.4: Is it likely that assessment of the outcome was influenced by knowledge of intervention received? |          | N/A              |
| <b>Risk-of-bias judgement</b>                                                                                                   |          | Low              |
| Optional: What is the predicted direction of bias in measurement of the outcome?                                                |          | NA               |

Domain 5: Risk of bias in selection of the reported result

| Signalling questions                                                                                                                                                                | Comments | Response options |
|-------------------------------------------------------------------------------------------------------------------------------------------------------------------------------------|----------|------------------|
| 5.1 Were the data that produced this result analysed in accordance with a pre-specified analysis plan that was finalized before unblinded outcome data were available for analysis? |          | <u>PY</u>        |
| Is the numerical result being assessed likely to have been selected, on the basis of the results, from...                                                                           |          |                  |
| 5.2. ... multiple eligible outcome measurements (e.g. scales, definitions, time points) within the outcome domain?                                                                  |          | <u>N</u>         |
| 5.3 ... multiple eligible analyses of the data?                                                                                                                                     |          | <u>N</u>         |
| <b>Risk-of-bias judgement</b>                                                                                                                                                       |          | Low              |
| Optional: What is the predicted direction of bias due to selection of the reported result?                                                                                          |          | NA               |

Overall risk of bias

|                                                                             |  |     |
|-----------------------------------------------------------------------------|--|-----|
| <b>Risk-of-bias judgement</b>                                               |  | Low |
| Optional: What is the overall predicted direction of bias for this outcome? |  | NA  |

## Study details

### Reference

Boudriot E, Thiele H, Walther T, Liebetrau C, Boeckstegers P, Pohl T, et al. Randomized Comparison of Percutaneous Coronary Intervention With Sirolimus-Eluting Stents Versus Coronary Artery Bypass Grafting in Patients With Coronary Artery Disease and Left Main Stem Stenosis. *J Am Coll Cardiol*. 2011 Feb;57(5):538–45.

### Study design

- Individually-randomized parallel-group trial
- Cluster-randomized parallel-group trial
- Individually randomized cross-over (or other matched) trial

For the purposes of this assessment, the interventions being compared are defined as

Experimental:

Comparator:

Specify which outcome is being assessed for risk of bias

Specify the numerical result being assessed. In case of multiple alternative analyses being presented, specify the numeric result (e.g. RR = 1.52 (95% CI 0.83 to 2.77) and/or a reference (e.g. to a table, figure or paragraph) that uniquely defines the result being assessed.

Is the review team's aim for this result...?

- to assess the effect of *assignment to intervention* (the 'intention-to-treat' effect)
- to assess the effect of *adhering to intervention* (the 'per-protocol' effect)

If the aim is to assess the effect of *adhering to intervention*, select the deviations from intended intervention that should be addressed (at least one must be checked):

- occurrence of non-protocol interventions
- failures in implementing the intervention that could have affected the outcome
- non-adherence to their assigned intervention by trial participants

Which of the following sources were obtained to help inform the risk-of-bias assessment? (tick as many as apply)

- Journal article(s) with results of the trial
- Trial protocol
- Statistical analysis plan (SAP)
- Non-commercial trial registry record (e.g. ClinicalTrials.gov record)
- Company-owned trial registry record (e.g. GSK Clinical Study Register record)
- "Grey literature" (e.g. unpublished thesis)
- Conference abstract(s) about the trial
- Regulatory document (e.g. Clinical Study Report, Drug Approval Package)
- Research ethics application
- Grant database summary (e.g. NIH RePORTER or Research Councils UK Gateway to Research)
- Personal communication with trialist
- Personal communication with the sponsor

Risk of bias assessment

Responses underlined in green are potential markers for low risk of bias, and responses in red are potential markers for a risk of bias. Where questions relate only to sign posts to other questions, no formatting is used.

Domain 1: Risk of bias arising from the randomization process

| Signalling questions                                                                                       | Comments | Response options |
|------------------------------------------------------------------------------------------------------------|----------|------------------|
| 1.1 Was the allocation sequence random?                                                                    |          | <u>Y</u>         |
| 1.2 Was the allocation sequence concealed until participants were enrolled and assigned to interventions?  |          | <u>Y</u>         |
| 1.3 Did baseline differences between intervention groups suggest a problem with the randomization process? |          | <u>N</u>         |
| Risk-of-bias judgement                                                                                     |          | Low              |
| Optional: What is the predicted direction of bias arising from the randomization process?                  |          | Unpredictable    |

Domain 2: Risk of bias due to deviations from the intended interventions (*effect of assignment to intervention*)

| Signalling questions                                                                                                                                                          | Comments | Response options |
|-------------------------------------------------------------------------------------------------------------------------------------------------------------------------------|----------|------------------|
| 2.1. Were participants aware of their assigned intervention during the trial?                                                                                                 |          | Y                |
| 2.2. Were carers and people delivering the interventions aware of participants' assigned intervention during the trial?                                                       |          | Y                |
| 2.3. If <u>Y/PY/NI</u> to 2.1 or 2.2: Were there deviations from the intended intervention that arose because of the trial context?                                           |          | Y                |
| 2.4 If <u>Y/PY</u> to 2.3: Were these deviations likely to have affected the outcome?                                                                                         |          | <u>PY</u>        |
| 2.5. If <u>Y/PY/NI</u> to 2.4: Were these deviations from intended intervention balanced between groups?                                                                      |          | <u>Y</u>         |
| 2.6 Was an appropriate analysis used to estimate the effect of assignment to intervention?                                                                                    |          | <u>Y</u>         |
| 2.7 If <u>N/PN/NI</u> to 2.6: Was there potential for a substantial impact (on the result) of the failure to analyse participants in the group to which they were randomized? |          | PY               |
| Risk-of-bias judgement                                                                                                                                                        |          | Some concerns    |
| Optional: What is the predicted direction of bias due to deviations from intended interventions?                                                                              |          | Unpredictable    |

Domain 2: Risk of bias due to deviations from the intended interventions (*effect of adhering to intervention*)

| Signalling questions                                                          | Comments | Response options |
|-------------------------------------------------------------------------------|----------|------------------|
| 2.1. Were participants aware of their assigned intervention during the trial? | N/A      | N/A              |

|                                                                                                                                                    |     |     |
|----------------------------------------------------------------------------------------------------------------------------------------------------|-----|-----|
| 2.2. Were carers and people delivering the interventions aware of participants' assigned intervention during the trial?                            |     | N/A |
| 2.3. [If applicable:] <u>If Y/PY/NI to 2.1 or 2.2</u> : Were important non-protocol interventions balanced across intervention groups?             | N/A | N/A |
| 2.4. [If applicable:] Were there failures in implementing the intervention that could have affected the outcome?                                   | N/A | N/A |
| 2.5. [If applicable:] Was there non-adherence to the assigned intervention regimen that could have affected participants' outcomes?                | N/A | Y   |
| 2.6. <u>If N/PN/NI to 2.3, or Y/PY/NI to 2.4 or 2.5</u> : Was an appropriate analysis used to estimate the effect of adhering to the intervention? | N/A | N/A |
| Risk-of-bias judgement                                                                                                                             | N/A | N/A |
| Optional: What is the predicted direction of bias due to deviations from intended interventions?                                                   | N/A | N/A |

Domain 3: Missing outcome data

| Signalling questions                                                                                     | Comments | Response options |
|----------------------------------------------------------------------------------------------------------|----------|------------------|
| 3.1 Were data for this outcome available for all, or nearly all, participants randomized?                |          | Y                |
| 3.2 <u>If N/PN/NI to 3.1</u> : Is there evidence that the result was not biased by missing outcome data? | N/A      | N/A              |
| 3.3 <u>If N/PN to 3.2</u> : Could missingness in the outcome depend on its true value?                   | N/A      | N/A              |
| 3.4 <u>If Y/PY/NI to 3.3</u> : Is it likely that missingness in the outcome depended on its true value?  |          | N/A              |
| Risk-of-bias judgement                                                                                   |          | Low              |
| Optional: What is the predicted direction of bias due to missing outcome data?                           |          | NA               |

Domain 4: Risk of bias in measurement of the outcome

| Signalling questions                                                                                                            | Comments | Response options |
|---------------------------------------------------------------------------------------------------------------------------------|----------|------------------|
| 4.1 Was the method of measuring the outcome inappropriate?                                                                      |          | <u>N</u>         |
| 4.2 Could measurement or ascertainment of the outcome have differed between intervention groups?                                |          | <u>N</u>         |
| 4.3 If <u>N/PN/NI</u> to 4.1 and 4.2: Were outcome assessors aware of the intervention received by study participants?          |          | <u>PN</u>        |
| 4.4 If <u>Y/PY/NI</u> to 4.3: Could assessment of the outcome have been influenced by knowledge of intervention received?       |          | N/A              |
| 4.5 If <u>Y/PY/NI</u> to 4.4: Is it likely that assessment of the outcome was influenced by knowledge of intervention received? |          | N/A              |
| <b>Risk-of-bias judgement</b>                                                                                                   |          | Low              |
| Optional: What is the predicted direction of bias in measurement of the outcome?                                                |          | NA               |

Domain 5: Risk of bias in selection of the reported result

| Signalling questions                                                                                                                                                                | Comments | Response options |
|-------------------------------------------------------------------------------------------------------------------------------------------------------------------------------------|----------|------------------|
| 5.1 Were the data that produced this result analysed in accordance with a pre-specified analysis plan that was finalized before unblinded outcome data were available for analysis? |          | <u>PY</u>        |
| Is the numerical result being assessed likely to have been selected, on the basis of the results, from...                                                                           |          |                  |
| 5.2. ... multiple eligible outcome measurements (e.g. scales, definitions, time points) within the outcome domain?                                                                  |          | <u>N</u>         |
| 5.3 ... multiple eligible analyses of the data?                                                                                                                                     |          | <u>N</u>         |
| <b>Risk-of-bias judgement</b>                                                                                                                                                       |          | Low              |
| Optional: What is the predicted direction of bias due to selection of the reported result?                                                                                          |          | NA               |

Overall risk of bias

|                                                                             |  |     |
|-----------------------------------------------------------------------------|--|-----|
| <b>Risk-of-bias judgement</b>                                               |  | Low |
| Optional: What is the overall predicted direction of bias for this outcome? |  | NA  |

## Study details

### Reference

Buszman PE, Buszman PP, Banasiewicz-Szkróbka I, Milewski KP, Żurakowski A, Orlik B, et al. Left Main Coronary Artery Disease: Comparison With Surgical Revascularization. *JACC Cardiovasc Interv.* 2016 Feb;9(4):318–27.

### Study design

- Individually-randomized parallel-group trial
- Cluster-randomized parallel-group trial
- Individually randomized cross-over (or other matched) trial

### For the purposes of this assessment, the interventions being compared are defined as

Experimental:  Comparator:

### Specify which outcome is being assessed for risk of bias

**Specify the numerical result being assessed.** In case of multiple alternative analyses being presented, specify the numeric result (e.g. RR = 1.52 (95% CI 0.83 to 2.77) and/or a reference (e.g. to a table, figure or paragraph) that uniquely defines the result being assessed.

### Is the review team's aim for this result...?

- to assess the effect of *assignment to intervention* (the 'intention-to-treat' effect)
- to assess the effect of *adhering to intervention* (the 'per-protocol' effect)

**If the aim is to assess the effect of *adhering to intervention***, select the deviations from intended intervention that should be addressed (at least one must be checked):

- occurrence of non-protocol interventions
- failures in implementing the intervention that could have affected the outcome
- non-adherence to their assigned intervention by trial participants

### Which of the following sources were obtained to help inform the risk-of-bias assessment? (tick as many as apply)

- Journal article(s) with results of the trial
- Trial protocol
- Statistical analysis plan (SAP)
- Non-commercial trial registry record (e.g. ClinicalTrials.gov record)
- Company-owned trial registry record (e.g. GSK Clinical Study Register record)
- "Grey literature" (e.g. unpublished thesis)
- Conference abstract(s) about the trial
- Regulatory document (e.g. Clinical Study Report, Drug Approval Package)
- Research ethics application
- Grant database summary (e.g. NIH RePORTER or Research Councils UK Gateway to Research)
- Personal communication with trialist
- Personal communication with the sponsor

Risk of bias assessment

Responses underlined in green are potential markers for low risk of bias, and responses in **red** are potential markers for a risk of bias. Where questions relate only to sign posts to other questions, no formatting is used.

Domain 1: Risk of bias arising from the randomization process

| Signalling questions                                                                                       | Comments | Response options |
|------------------------------------------------------------------------------------------------------------|----------|------------------|
| 1.1 Was the allocation sequence random?                                                                    |          | <u>Y</u>         |
| 1.2 Was the allocation sequence concealed until participants were enrolled and assigned to interventions?  |          | <u>Y</u>         |
| 1.3 Did baseline differences between intervention groups suggest a problem with the randomization process? |          | <u>N</u>         |
| Risk-of-bias judgement                                                                                     |          | Low              |
| Optional: What is the predicted direction of bias arising from the randomization process?                  |          | Unpredictable    |

Domain 2: Risk of bias due to deviations from the intended interventions (*effect of assignment to intervention*)

| Signalling questions                                                                                                                                                          | Comments | Response options |
|-------------------------------------------------------------------------------------------------------------------------------------------------------------------------------|----------|------------------|
| 2.1. Were participants aware of their assigned intervention during the trial?                                                                                                 |          | <b>Y</b>         |
| 2.2. Were carers and people delivering the interventions aware of participants' assigned intervention during the trial?                                                       |          | <b>Y</b>         |
| 2.3. If <b>Y/PY/NI</b> to 2.1 or 2.2: Were there deviations from the intended intervention that arose because of the trial context?                                           |          | <b>Y</b>         |
| 2.4 If <b>Y/PY</b> to 2.3: Were these deviations likely to have affected the outcome?                                                                                         |          | <b><u>PY</u></b> |
| 2.5. If <b>Y/PY/NI</b> to 2.4: Were these deviations from intended intervention balanced between groups?                                                                      |          | <u>Y</u>         |
| 2.6 Was an appropriate analysis used to estimate the effect of assignment to intervention?                                                                                    |          | <u>Y</u>         |
| 2.7 If <b>N/PN/NI</b> to 2.6: Was there potential for a substantial impact (on the result) of the failure to analyse participants in the group to which they were randomized? |          | <b>PY</b>        |
| Risk-of-bias judgement                                                                                                                                                        |          | Some concerns    |
| Optional: What is the predicted direction of bias due to deviations from intended interventions?                                                                              |          | Unpredictable    |

Domain 2: Risk of bias due to deviations from the intended interventions (*effect of adhering to intervention*)

| Signalling questions                                                          | Comments | Response options |
|-------------------------------------------------------------------------------|----------|------------------|
| 2.1. Were participants aware of their assigned intervention during the trial? | N/A      | N/A              |

|                                                                                                                                                    |     |     |
|----------------------------------------------------------------------------------------------------------------------------------------------------|-----|-----|
| 2.2. Were carers and people delivering the interventions aware of participants' assigned intervention during the trial?                            |     | N/A |
| 2.3. [If applicable:] <u>If Y/PY/NI to 2.1 or 2.2</u> : Were important non-protocol interventions balanced across intervention groups?             | N/A | N/A |
| 2.4. [If applicable:] Were there failures in implementing the intervention that could have affected the outcome?                                   | N/A | N/A |
| 2.5. [If applicable:] Was there non-adherence to the assigned intervention regimen that could have affected participants' outcomes?                | N/A | Y   |
| 2.6. <u>If N/PN/NI to 2.3, or Y/PY/NI to 2.4 or 2.5</u> : Was an appropriate analysis used to estimate the effect of adhering to the intervention? | N/A | N/A |
| Risk-of-bias judgement                                                                                                                             | N/A | N/A |
| Optional: What is the predicted direction of bias due to deviations from intended interventions?                                                   | N/A | N/A |

Domain 3: Missing outcome data

| Signalling questions                                                                                     | Comments | Response options |
|----------------------------------------------------------------------------------------------------------|----------|------------------|
| 3.1 Were data for this outcome available for all, or nearly all, participants randomized?                |          | Y                |
| 3.2 <u>If N/PN/NI to 3.1</u> : Is there evidence that the result was not biased by missing outcome data? | N/A      | N/A              |
| 3.3 <u>If N/PN to 3.2</u> : Could missingness in the outcome depend on its true value?                   | N/A      | N/A              |
| 3.4 <u>If Y/PY/NI to 3.3</u> : Is it likely that missingness in the outcome depended on its true value?  |          | N/A              |
| Risk-of-bias judgement                                                                                   |          | Low              |
| Optional: What is the predicted direction of bias due to missing outcome data?                           |          | NA               |



Domain 4: Risk of bias in measurement of the outcome

| Signalling questions                                                                                                            | Comments | Response options |
|---------------------------------------------------------------------------------------------------------------------------------|----------|------------------|
| 4.1 Was the method of measuring the outcome inappropriate?                                                                      |          | <u>N</u>         |
| 4.2 Could measurement or ascertainment of the outcome have differed between intervention groups?                                |          | <u>N</u>         |
| 4.3 If <u>N/PN/NI</u> to 4.1 and 4.2: Were outcome assessors aware of the intervention received by study participants?          |          | <u>PN</u>        |
| 4.4 If <u>Y/PY/NI</u> to 4.3: Could assessment of the outcome have been influenced by knowledge of intervention received?       |          | N/A              |
| 4.5 If <u>Y/PY/NI</u> to 4.4: Is it likely that assessment of the outcome was influenced by knowledge of intervention received? |          | N/A              |
| <b>Risk-of-bias judgement</b>                                                                                                   |          | Low              |
| Optional: What is the predicted direction of bias in measurement of the outcome?                                                |          | NA               |

Domain 5: Risk of bias in selection of the reported result

| Signalling questions                                                                                                                                                                | Comments | Response options |
|-------------------------------------------------------------------------------------------------------------------------------------------------------------------------------------|----------|------------------|
| 5.1 Were the data that produced this result analysed in accordance with a pre-specified analysis plan that was finalized before unblinded outcome data were available for analysis? |          | <u>PY</u>        |
| Is the numerical result being assessed likely to have been selected, on the basis of the results, from...                                                                           |          |                  |
| 5.2. ... multiple eligible outcome measurements (e.g. scales, definitions, time points) within the outcome domain?                                                                  |          | <u>N</u>         |
| 5.3 ... multiple eligible analyses of the data?                                                                                                                                     |          | <u>N</u>         |
| <b>Risk-of-bias judgement</b>                                                                                                                                                       |          | Low              |
| Optional: What is the predicted direction of bias due to selection of the reported result?                                                                                          |          | NA               |

Overall risk of bias

|                                                                             |  |     |
|-----------------------------------------------------------------------------|--|-----|
| <b>Risk-of-bias judgement</b>                                               |  | Low |
| Optional: What is the overall predicted direction of bias for this outcome? |  | NA  |

## Study details

### Reference

Kapur A, Hall RJ, Malik IS, Qureshi AC, Butts J, de Belder M, et al. Randomized Comparison of P Intervention With Coronary Artery Bypass Grafting in Diabetic Patients. J Am Coll Cardiol. 201

### Study design

- Individually-randomized parallel-group trial
- Cluster-randomized parallel-group trial
- Individually randomized cross-over (or other matched) trial

### For the purposes of this assessment, the interventions being compared are defined as

Experimental:  Comparator:

### Specify which outcome is being assessed for risk of bias

**Specify the numerical result being assessed.** In case of multiple alternative analyses being presented, specify the numeric result (e.g. RR = 1.52 (95% CI 0.83 to 2.77) and/or a reference (e.g. to a table, figure or paragraph) that uniquely defines the result being assessed.

### Is the review team's aim for this result...?

- to assess the effect of *assignment to intervention* (the 'intention-to-treat' effect)
- to assess the effect of *adhering to intervention* (the 'per-protocol' effect)

**If the aim is to assess the effect of *adhering to intervention***, select the deviations from intended intervention that should be addressed (at least one must be checked):

- occurrence of non-protocol interventions
- failures in implementing the intervention that could have affected the outcome
- non-adherence to their assigned intervention by trial participants

### Which of the following sources were obtained to help inform the risk-of-bias assessment? (tick as many as apply)

- Journal article(s) with results of the trial
- Trial protocol
- Statistical analysis plan (SAP)
- Non-commercial trial registry record (e.g. ClinicalTrials.gov record)
- Company-owned trial registry record (e.g. GSK Clinical Study Register record)
- "Grey literature" (e.g. unpublished thesis)
- Conference abstract(s) about the trial
- Regulatory document (e.g. Clinical Study Report, Drug Approval Package)
- Research ethics application
- Grant database summary (e.g. NIH RePORTER or Research Councils UK Gateway to Research)
- Personal communication with trialist
- Personal communication with the sponsor

Risk of bias assessment

Responses underlined in green are potential markers for low risk of bias, and responses in red are potential markers for a risk of bias. Where questions relate only to sign posts to other questions, no formatting is used.

Domain 1: Risk of bias arising from the randomization process

| Signalling questions                                                                                       | Comments | Response options |
|------------------------------------------------------------------------------------------------------------|----------|------------------|
| 1.1 Was the allocation sequence random?                                                                    |          | <u>Y</u>         |
| 1.2 Was the allocation sequence concealed until participants were enrolled and assigned to interventions?  |          | <u>Y</u>         |
| 1.3 Did baseline differences between intervention groups suggest a problem with the randomization process? |          | <u>N</u>         |
| Risk-of-bias judgement                                                                                     |          | Low              |
| Optional: What is the predicted direction of bias arising from the randomization process?                  |          | Unpredictable    |

Domain 2: Risk of bias due to deviations from the intended interventions (*effect of assignment to intervention*)

| Signalling questions                                                                                                                                                          | Comments | Response options |
|-------------------------------------------------------------------------------------------------------------------------------------------------------------------------------|----------|------------------|
| 2.1. Were participants aware of their assigned intervention during the trial?                                                                                                 |          | Y                |
| 2.2. Were carers and people delivering the interventions aware of participants' assigned intervention during the trial?                                                       |          | Y                |
| 2.3. If <u>Y/PY/NI</u> to 2.1 or 2.2: Were there deviations from the intended intervention that arose because of the trial context?                                           |          | Y                |
| 2.4 If <u>Y/PY</u> to 2.3: Were these deviations likely to have affected the outcome?                                                                                         |          | <u>PY</u>        |
| 2.5. If <u>Y/PY/NI</u> to 2.4: Were these deviations from intended intervention balanced between groups?                                                                      |          | <u>Y</u>         |
| 2.6 Was an appropriate analysis used to estimate the effect of assignment to intervention?                                                                                    |          | <u>Y</u>         |
| 2.7 If <u>N/PN/NI</u> to 2.6: Was there potential for a substantial impact (on the result) of the failure to analyse participants in the group to which they were randomized? |          | PY               |
| Risk-of-bias judgement                                                                                                                                                        |          | Some concerns    |
| Optional: What is the predicted direction of bias due to deviations from intended interventions?                                                                              |          | Unpredictable    |

Domain 2: Risk of bias due to deviations from the intended interventions (*effect of adhering to intervention*)

| Signalling questions                                                          | Comments | Response options |
|-------------------------------------------------------------------------------|----------|------------------|
| 2.1. Were participants aware of their assigned intervention during the trial? | N/A      | N/A              |

|                                                                                                                                                    |     |     |
|----------------------------------------------------------------------------------------------------------------------------------------------------|-----|-----|
| 2.2. Were carers and people delivering the interventions aware of participants' assigned intervention during the trial?                            |     | N/A |
| 2.3. [If applicable:] <u>If Y/PY/NI to 2.1 or 2.2</u> : Were important non-protocol interventions balanced across intervention groups?             | N/A | N/A |
| 2.4. [If applicable:] Were there failures in implementing the intervention that could have affected the outcome?                                   | N/A | N/A |
| 2.5. [If applicable:] Was there non-adherence to the assigned intervention regimen that could have affected participants' outcomes?                | N/A | Y   |
| 2.6. <u>If N/PN/NI to 2.3, or Y/PY/NI to 2.4 or 2.5</u> : Was an appropriate analysis used to estimate the effect of adhering to the intervention? | N/A | N/A |
| Risk-of-bias judgement                                                                                                                             | N/A | N/A |
| Optional: What is the predicted direction of bias due to deviations from intended interventions?                                                   | N/A | N/A |

Domain 3: Missing outcome data

| Signalling questions                                                                                     | Comments | Response options |
|----------------------------------------------------------------------------------------------------------|----------|------------------|
| 3.1 Were data for this outcome available for all, or nearly all, participants randomized?                |          | Y                |
| 3.2 <u>If N/PN/NI to 3.1</u> : Is there evidence that the result was not biased by missing outcome data? | N/A      | N/A              |
| 3.3 <u>If N/PN to 3.2</u> : Could missingness in the outcome depend on its true value?                   | N/A      | N/A              |
| 3.4 <u>If Y/PY/NI to 3.3</u> : Is it likely that missingness in the outcome depended on its true value?  |          | N/A              |
| Risk-of-bias judgement                                                                                   |          | Low              |
| Optional: What is the predicted direction of bias due to missing outcome data?                           |          | NA               |

Domain 4: Risk of bias in measurement of the outcome

| Signalling questions                                                                                                            | Comments | Response options |
|---------------------------------------------------------------------------------------------------------------------------------|----------|------------------|
| 4.1 Was the method of measuring the outcome inappropriate?                                                                      |          | <u>N</u>         |
| 4.2 Could measurement or ascertainment of the outcome have differed between intervention groups?                                |          | <u>N</u>         |
| 4.3 If <u>N/PN/NI</u> to 4.1 and 4.2: Were outcome assessors aware of the intervention received by study participants?          |          | <u>PN</u>        |
| 4.4 If <u>Y/PY/NI</u> to 4.3: Could assessment of the outcome have been influenced by knowledge of intervention received?       |          | N/A              |
| 4.5 If <u>Y/PY/NI</u> to 4.4: Is it likely that assessment of the outcome was influenced by knowledge of intervention received? |          | N/A              |
| <b>Risk-of-bias judgement</b>                                                                                                   |          | Low              |
| Optional: What is the predicted direction of bias in measurement of the outcome?                                                |          | NA               |

Domain 5: Risk of bias in selection of the reported result

| Signalling questions                                                                                                                                                                | Comments | Response options |
|-------------------------------------------------------------------------------------------------------------------------------------------------------------------------------------|----------|------------------|
| 5.1 Were the data that produced this result analysed in accordance with a pre-specified analysis plan that was finalized before unblinded outcome data were available for analysis? |          | <u>PY</u>        |
| Is the numerical result being assessed likely to have been selected, on the basis of the results, from...                                                                           |          |                  |
| 5.2. ... multiple eligible outcome measurements (e.g. scales, definitions, time points) within the outcome domain?                                                                  |          | <u>N</u>         |
| 5.3 ... multiple eligible analyses of the data?                                                                                                                                     |          | <u>N</u>         |
| <b>Risk-of-bias judgement</b>                                                                                                                                                       |          | Low              |
| Optional: What is the predicted direction of bias due to selection of the reported result?                                                                                          |          | NA               |

Overall risk of bias

|                                                                             |  |     |
|-----------------------------------------------------------------------------|--|-----|
| <b>Risk-of-bias judgement</b>                                               |  | Low |
| Optional: What is the overall predicted direction of bias for this outcome? |  | NA  |

## Study details

### Reference

Blazek S, Holzhey D, Jungert C, Borger MA, Fuernau G, Desch S, et al. Comparison of Bare-Metal Invasive Bypass Surgery for Stenosis of the Left Anterior Descending Coronary Artery. *JACC Cath* Jan;6(1):20–6.

## Study design

- Individually-randomized parallel-group trial
- Cluster-randomized parallel-group trial
- Individually randomized cross-over (or other matched) trial

For the purposes of this assessment, the interventions being compared are defined as

Experimental:  Comparator:

Specify which outcome is being assessed for risk of bias

Specify the numerical result being assessed. In case of multiple alternative analyses being presented, specify the numeric result (e.g. RR = 1.52 (95% CI 0.83 to 2.77) and/or a reference (e.g. to a table, figure or paragraph) that uniquely defines the result being assessed.

Is the review team's aim for this result...?

- to assess the effect of *assignment to intervention* (the 'intention-to-treat' effect)
- to assess the effect of *adhering to intervention* (the 'per-protocol' effect)

If the aim is to assess the effect of *adhering to intervention*, select the deviations from intended intervention that should be addressed (at least one must be checked):

- occurrence of non-protocol interventions
- failures in implementing the intervention that could have affected the outcome
- non-adherence to their assigned intervention by trial participants

Which of the following sources were obtained to help inform the risk-of-bias assessment? (tick as many as apply)

- Journal article(s) with results of the trial
- Trial protocol
- Statistical analysis plan (SAP)
- Non-commercial trial registry record (e.g. ClinicalTrials.gov record)
- Company-owned trial registry record (e.g. GSK Clinical Study Register record)
- "Grey literature" (e.g. unpublished thesis)
- Conference abstract(s) about the trial
- Regulatory document (e.g. Clinical Study Report, Drug Approval Package)
- Research ethics application
- Grant database summary (e.g. NIH RePORTER or Research Councils UK Gateway to Research)
- Personal communication with trialist
- Personal communication with the sponsor

Risk of bias assessment

Responses underlined in green are potential markers for low risk of bias, and responses in **red** are potential markers for a risk of bias. Where questions relate only to sign posts to other questions, no formatting is used.

Domain 1: Risk of bias arising from the randomization process

| Signalling questions                                                                                       | Comments | Response options |
|------------------------------------------------------------------------------------------------------------|----------|------------------|
| 1.1 Was the allocation sequence random?                                                                    |          | <u>Y</u>         |
| 1.2 Was the allocation sequence concealed until participants were enrolled and assigned to interventions?  |          | <u>Y</u>         |
| 1.3 Did baseline differences between intervention groups suggest a problem with the randomization process? |          | <u>N</u>         |
| Risk-of-bias judgement                                                                                     |          | Low              |
| Optional: What is the predicted direction of bias arising from the randomization process?                  |          | Unpredictable    |

Domain 2: Risk of bias due to deviations from the intended interventions (*effect of assignment to intervention*)

| Signalling questions                                                                                                                                                          | Comments | Response options |
|-------------------------------------------------------------------------------------------------------------------------------------------------------------------------------|----------|------------------|
| 2.1. Were participants aware of their assigned intervention during the trial?                                                                                                 |          | <b>Y</b>         |
| 2.2. Were carers and people delivering the interventions aware of participants' assigned intervention during the trial?                                                       |          | <b>Y</b>         |
| 2.3. If <b>Y/PY/NI</b> to 2.1 or 2.2: Were there deviations from the intended intervention that arose because of the trial context?                                           |          | <b>Y</b>         |
| 2.4 If <b>Y/PY</b> to 2.3: Were these deviations likely to have affected the outcome?                                                                                         |          | <b><u>PY</u></b> |
| 2.5. If <b>Y/PY/NI</b> to 2.4: Were these deviations from intended intervention balanced between groups?                                                                      |          | <u>Y</u>         |
| 2.6 Was an appropriate analysis used to estimate the effect of assignment to intervention?                                                                                    |          | <u>Y</u>         |
| 2.7 If <b>N/PN/NI</b> to 2.6: Was there potential for a substantial impact (on the result) of the failure to analyse participants in the group to which they were randomized? |          | <b>PY</b>        |
| Risk-of-bias judgement                                                                                                                                                        |          | Some concerns    |
| Optional: What is the predicted direction of bias due to deviations from intended interventions?                                                                              |          | Unpredictable    |

Domain 2: Risk of bias due to deviations from the intended interventions (*effect of adhering to intervention*)

| Signalling questions                                                          | Comments | Response options |
|-------------------------------------------------------------------------------|----------|------------------|
| 2.1. Were participants aware of their assigned intervention during the trial? | N/A      | N/A              |

|                                                                                                                                                   |     |     |
|---------------------------------------------------------------------------------------------------------------------------------------------------|-----|-----|
| 2.2. Were carers and people delivering the interventions aware of participants' assigned intervention during the trial?                           |     | N/A |
| 2.3. [If applicable:] <u>If Y/PY/NI to 2.1 or 2.2:</u> Were important non-protocol interventions balanced across intervention groups?             | N/A | N/A |
| 2.4. [If applicable:] Were there failures in implementing the intervention that could have affected the outcome?                                  | N/A | N/A |
| 2.5. [If applicable:] Was there non-adherence to the assigned intervention regimen that could have affected participants' outcomes?               | N/A | Y   |
| 2.6. <u>If N/PN/NI to 2.3, or Y/PY/NI to 2.4 or 2.5:</u> Was an appropriate analysis used to estimate the effect of adhering to the intervention? | N/A | N/A |
| Risk-of-bias judgement                                                                                                                            | N/A | N/A |
| Optional: What is the predicted direction of bias due to deviations from intended interventions?                                                  | N/A | N/A |

Domain 3: Missing outcome data

| Signalling questions                                                                                    | Comments | Response options |
|---------------------------------------------------------------------------------------------------------|----------|------------------|
| 3.1 Were data for this outcome available for all, or nearly all, participants randomized?               |          | Y                |
| 3.2 <u>If N/PN/NI to 3.1:</u> Is there evidence that the result was not biased by missing outcome data? | N/A      | N/A              |
| 3.3 <u>If N/PN to 3.2:</u> Could missingness in the outcome depend on its true value?                   | N/A      | N/A              |
| 3.4 <u>If Y/PY/NI to 3.3:</u> Is it likely that missingness in the outcome depended on its true value?  |          | N/A              |
| Risk-of-bias judgement                                                                                  |          | Low              |
| Optional: What is the predicted direction of bias due to missing outcome data?                          |          | NA               |



Domain 4: Risk of bias in measurement of the outcome

| Signalling questions                                                                                                            | Comments | Response options |
|---------------------------------------------------------------------------------------------------------------------------------|----------|------------------|
| 4.1 Was the method of measuring the outcome inappropriate?                                                                      |          | <u>N</u>         |
| 4.2 Could measurement or ascertainment of the outcome have differed between intervention groups?                                |          | <u>N</u>         |
| 4.3 If <u>N/PN/NI</u> to 4.1 and 4.2: Were outcome assessors aware of the intervention received by study participants?          |          | <u>PN</u>        |
| 4.4 If <u>Y/PY/NI</u> to 4.3: Could assessment of the outcome have been influenced by knowledge of intervention received?       |          | N/A              |
| 4.5 If <u>Y/PY/NI</u> to 4.4: Is it likely that assessment of the outcome was influenced by knowledge of intervention received? |          | N/A              |
| <b>Risk-of-bias judgement</b>                                                                                                   |          | Low              |
| Optional: What is the predicted direction of bias in measurement of the outcome?                                                |          | NA               |

Domain 5: Risk of bias in selection of the reported result

| Signalling questions                                                                                                                                                                | Comments | Response options |
|-------------------------------------------------------------------------------------------------------------------------------------------------------------------------------------|----------|------------------|
| 5.1 Were the data that produced this result analysed in accordance with a pre-specified analysis plan that was finalized before unblinded outcome data were available for analysis? |          | <u>PY</u>        |
| Is the numerical result being assessed likely to have been selected, on the basis of the results, from...                                                                           |          |                  |
| 5.2. ... multiple eligible outcome measurements (e.g. scales, definitions, time points) within the outcome domain?                                                                  |          | <u>N</u>         |
| 5.3 ... multiple eligible analyses of the data?                                                                                                                                     |          | <u>N</u>         |
| <b>Risk-of-bias judgement</b>                                                                                                                                                       |          | Low              |
| Optional: What is the predicted direction of bias due to selection of the reported result?                                                                                          |          | NA               |

Overall risk of bias

|                                                                             |  |     |
|-----------------------------------------------------------------------------|--|-----|
| <b>Risk-of-bias judgement</b>                                               |  | Low |
| Optional: What is the overall predicted direction of bias for this outcome? |  | NA  |

## Study details

### Reference

Drenth DJ, Veeger NJGM, Middel B, Zijlstra F, Boonstra PW. Comparison of late (four years) follow-up between percutaneous transluminal angioplasty intervention and off-pump left internal mammary artery bypass grafting for isolated high-grade narrowing of the proximal left anterior descending coronary artery. *Am J Cardiol*. 2005;94(11):1414–7.

### Study design

- Individually-randomized parallel-group trial
- Cluster-randomized parallel-group trial
- Individually randomized cross-over (or other matched) trial

For the purposes of this assessment, the interventions being compared are defined as

Experimental:  Comparator:

Specify which outcome is being assessed for risk of bias

Specify the numerical result being assessed. In case of multiple alternative analyses being presented, specify the numeric result (e.g. RR = 1.52 (95% CI 0.83 to 2.77) and/or a reference (e.g. to a table, figure or paragraph) that uniquely defines the result being assessed.

Is the review team's aim for this result...?

- to assess the effect of *assignment to intervention* (the 'intention-to-treat' effect)
- to assess the effect of *adhering to intervention* (the 'per-protocol' effect)

If the aim is to assess the effect of *adhering to intervention*, select the deviations from intended intervention that should be addressed (at least one must be checked):

- occurrence of non-protocol interventions
- failures in implementing the intervention that could have affected the outcome
- non-adherence to their assigned intervention by trial participants

Which of the following sources were obtained to help inform the risk-of-bias assessment? (tick as many as apply)

- Journal article(s) with results of the trial
- Trial protocol
- Statistical analysis plan (SAP)
- Non-commercial trial registry record (e.g. ClinicalTrials.gov record)
- Company-owned trial registry record (e.g. GSK Clinical Study Register record)
- "Grey literature" (e.g. unpublished thesis)
- Conference abstract(s) about the trial
- Regulatory document (e.g. Clinical Study Report, Drug Approval Package)
- Research ethics application
- Grant database summary (e.g. NIH RePORTER or Research Councils UK Gateway to Research)
- Personal communication with trialist
- Personal communication with the sponsor

Risk of bias assessment

Responses underlined in green are potential markers for low risk of bias, and responses in **red** are potential markers for a risk of bias. Where questions relate only to sign posts to other questions, no formatting is used.

Domain 1: Risk of bias arising from the randomization process

| Signalling questions                                                                                       | Comments | Response options |
|------------------------------------------------------------------------------------------------------------|----------|------------------|
| 1.1 Was the allocation sequence random?                                                                    |          | <u>Y</u>         |
| 1.2 Was the allocation sequence concealed until participants were enrolled and assigned to interventions?  |          | <u>Y</u>         |
| 1.3 Did baseline differences between intervention groups suggest a problem with the randomization process? |          | <u>N</u>         |
| Risk-of-bias judgement                                                                                     |          | Low              |
| Optional: What is the predicted direction of bias arising from the randomization process?                  |          | Unpredictable    |

Domain 2: Risk of bias due to deviations from the intended interventions (*effect of assignment to intervention*)

| Signalling questions                                                                                                                                                          | Comments | Response options |
|-------------------------------------------------------------------------------------------------------------------------------------------------------------------------------|----------|------------------|
| 2.1. Were participants aware of their assigned intervention during the trial?                                                                                                 |          | <b>Y</b>         |
| 2.2. Were carers and people delivering the interventions aware of participants' assigned intervention during the trial?                                                       |          | <b>Y</b>         |
| 2.3. If <b>Y/PY/NI</b> to 2.1 or 2.2: Were there deviations from the intended intervention that arose because of the trial context?                                           |          | <b>Y</b>         |
| 2.4 If <b>Y/PY</b> to 2.3: Were these deviations likely to have affected the outcome?                                                                                         |          | <b><u>PY</u></b> |
| 2.5. If <b>Y/PY/NI</b> to 2.4: Were these deviations from intended intervention balanced between groups?                                                                      |          | <u>Y</u>         |
| 2.6 Was an appropriate analysis used to estimate the effect of assignment to intervention?                                                                                    |          | <u>Y</u>         |
| 2.7 If <b>N/PN/NI</b> to 2.6: Was there potential for a substantial impact (on the result) of the failure to analyse participants in the group to which they were randomized? |          | <b>PY</b>        |
| Risk-of-bias judgement                                                                                                                                                        |          | Some concerns    |
| Optional: What is the predicted direction of bias due to deviations from intended interventions?                                                                              |          | Unpredictable    |

Domain 2: Risk of bias due to deviations from the intended interventions (*effect of adhering to intervention*)

| Signalling questions                                                          | Comments | Response options |
|-------------------------------------------------------------------------------|----------|------------------|
| 2.1. Were participants aware of their assigned intervention during the trial? | N/A      | N/A              |

|                                                                                                                                                    |     |     |
|----------------------------------------------------------------------------------------------------------------------------------------------------|-----|-----|
| 2.2. Were carers and people delivering the interventions aware of participants' assigned intervention during the trial?                            |     | N/A |
| 2.3. [If applicable:] <u>If Y/PY/NI to 2.1 or 2.2</u> : Were important non-protocol interventions balanced across intervention groups?             | N/A | N/A |
| 2.4. [If applicable:] Were there failures in implementing the intervention that could have affected the outcome?                                   | N/A | N/A |
| 2.5. [If applicable:] Was there non-adherence to the assigned intervention regimen that could have affected participants' outcomes?                | N/A | Y   |
| 2.6. <u>If N/PN/NI to 2.3, or Y/PY/NI to 2.4 or 2.5</u> : Was an appropriate analysis used to estimate the effect of adhering to the intervention? | N/A | N/A |
| Risk-of-bias judgement                                                                                                                             | N/A | N/A |
| Optional: What is the predicted direction of bias due to deviations from intended interventions?                                                   | N/A | N/A |

Domain 3: Missing outcome data

| Signalling questions                                                                                     | Comments | Response options |
|----------------------------------------------------------------------------------------------------------|----------|------------------|
| 3.1 Were data for this outcome available for all, or nearly all, participants randomized?                |          | Y                |
| 3.2 <u>If N/PN/NI to 3.1</u> : Is there evidence that the result was not biased by missing outcome data? | N/A      | N/A              |
| 3.3 <u>If N/PN to 3.2</u> : Could missingness in the outcome depend on its true value?                   | N/A      | N/A              |
| 3.4 <u>If Y/PY/NI to 3.3</u> : Is it likely that missingness in the outcome depended on its true value?  |          | N/A              |
| Risk-of-bias judgement                                                                                   |          | Low              |
| Optional: What is the predicted direction of bias due to missing outcome data?                           |          | NA               |

Domain 4: Risk of bias in measurement of the outcome

| Signalling questions                                                                                                            | Comments | Response options |
|---------------------------------------------------------------------------------------------------------------------------------|----------|------------------|
| 4.1 Was the method of measuring the outcome inappropriate?                                                                      |          | <u>N</u>         |
| 4.2 Could measurement or ascertainment of the outcome have differed between intervention groups?                                |          | <u>N</u>         |
| 4.3 If <u>N/PN/NI</u> to 4.1 and 4.2: Were outcome assessors aware of the intervention received by study participants?          |          | <u>PN</u>        |
| 4.4 If <u>Y/PY/NI</u> to 4.3: Could assessment of the outcome have been influenced by knowledge of intervention received?       |          | N/A              |
| 4.5 If <u>Y/PY/NI</u> to 4.4: Is it likely that assessment of the outcome was influenced by knowledge of intervention received? |          | N/A              |
| <b>Risk-of-bias judgement</b>                                                                                                   |          | Low              |
| Optional: What is the predicted direction of bias in measurement of the outcome?                                                |          | NA               |

Domain 5: Risk of bias in selection of the reported result

| Signalling questions                                                                                                                                                                | Comments | Response options |
|-------------------------------------------------------------------------------------------------------------------------------------------------------------------------------------|----------|------------------|
| 5.1 Were the data that produced this result analysed in accordance with a pre-specified analysis plan that was finalized before unblinded outcome data were available for analysis? |          | <u>PY</u>        |
| Is the numerical result being assessed likely to have been selected, on the basis of the results, from...                                                                           |          |                  |
| 5.2. ... multiple eligible outcome measurements (e.g. scales, definitions, time points) within the outcome domain?                                                                  |          | <u>N</u>         |
| 5.3 ... multiple eligible analyses of the data?                                                                                                                                     |          | <u>N</u>         |
| <b>Risk-of-bias judgement</b>                                                                                                                                                       |          | Low              |
| Optional: What is the predicted direction of bias due to selection of the reported result?                                                                                          |          | NA               |

Overall risk of bias

|                                                                             |  |     |
|-----------------------------------------------------------------------------|--|-----|
| <b>Risk-of-bias judgement</b>                                               |  | Low |
| Optional: What is the overall predicted direction of bias for this outcome? |  | NA  |

## Study details

### Reference

Hong SJ, Lim D-S, Seo HS, Kim Y-H, Shim WJ, Park CG, et al. Percutaneous coronary interventional implantation vs. minimally invasive direct coronary artery bypass (MIDCAB) in patients with left coronary artery stenosis. *Catheter Cardiovasc Interv.* 2005 Jan;64(1):75–81.

## Study design

- Individually-randomized parallel-group trial
- Cluster-randomized parallel-group trial
- Individually randomized cross-over (or other matched) trial

## For the purposes of this assessment, the interventions being compared are defined as

Experimental:  Comparator:

## Specify which outcome is being assessed for risk of bias

**Specify the numerical result being assessed.** In case of multiple alternative analyses being presented, specify the numeric result (e.g. RR = 1.52 (95% CI 0.83 to 2.77) and/or a reference (e.g. to a table, figure or paragraph) that uniquely defines the result being assessed.

## Is the review team's aim for this result...?

- to assess the effect of *assignment to intervention* (the 'intention-to-treat' effect)
- to assess the effect of *adhering to intervention* (the 'per-protocol' effect)

**If the aim is to assess the effect of *adhering to intervention***, select the deviations from intended intervention that should be addressed (at least one must be checked):

- occurrence of non-protocol interventions
- failures in implementing the intervention that could have affected the outcome
- non-adherence to their assigned intervention by trial participants

## Which of the following sources were obtained to help inform the risk-of-bias assessment? (tick as many as apply)

- Journal article(s) with results of the trial
- Trial protocol
- Statistical analysis plan (SAP)
- Non-commercial trial registry record (e.g. ClinicalTrials.gov record)
- Company-owned trial registry record (e.g. GSK Clinical Study Register record)
- "Grey literature" (e.g. unpublished thesis)
- Conference abstract(s) about the trial
- Regulatory document (e.g. Clinical Study Report, Drug Approval Package)
- Research ethics application
- Grant database summary (e.g. NIH RePORTER or Research Councils UK Gateway to Research)
- Personal communication with trialist
- Personal communication with the sponsor

Risk of bias assessment

Responses underlined in green are potential markers for low risk of bias, and responses in **red** are potential markers for a risk of bias. Where questions relate only to sign posts to other questions, no formatting is used.

Domain 1: Risk of bias arising from the randomization process

| Signalling questions                                                                                       | Comments | Response options |
|------------------------------------------------------------------------------------------------------------|----------|------------------|
| 1.1 Was the allocation sequence random?                                                                    |          | <u>Y</u>         |
| 1.2 Was the allocation sequence concealed until participants were enrolled and assigned to interventions?  |          | <u>Y</u>         |
| 1.3 Did baseline differences between intervention groups suggest a problem with the randomization process? |          | <u>N</u>         |
| Risk-of-bias judgement                                                                                     |          | Low              |
| Optional: What is the predicted direction of bias arising from the randomization process?                  |          | Unpredictable    |

Domain 2: Risk of bias due to deviations from the intended interventions (*effect of assignment to intervention*)

| Signalling questions                                                                                                                                                          | Comments | Response options |
|-------------------------------------------------------------------------------------------------------------------------------------------------------------------------------|----------|------------------|
| 2.1. Were participants aware of their assigned intervention during the trial?                                                                                                 |          | <b>Y</b>         |
| 2.2. Were carers and people delivering the interventions aware of participants' assigned intervention during the trial?                                                       |          | <b>Y</b>         |
| 2.3. If <b>Y/PY/NI</b> to 2.1 or 2.2: Were there deviations from the intended intervention that arose because of the trial context?                                           |          | <b>Y</b>         |
| 2.4 If <b>Y/PY</b> to 2.3: Were these deviations likely to have affected the outcome?                                                                                         |          | <b><u>PY</u></b> |
| 2.5. If <b>Y/PY/NI</b> to 2.4: Were these deviations from intended intervention balanced between groups?                                                                      |          | <u>Y</u>         |
| 2.6 Was an appropriate analysis used to estimate the effect of assignment to intervention?                                                                                    |          | <u>Y</u>         |
| 2.7 If <b>N/PN/NI</b> to 2.6: Was there potential for a substantial impact (on the result) of the failure to analyse participants in the group to which they were randomized? |          | <b>PY</b>        |
| Risk-of-bias judgement                                                                                                                                                        |          | Some concerns    |
| Optional: What is the predicted direction of bias due to deviations from intended interventions?                                                                              |          | Unpredictable    |

Domain 2: Risk of bias due to deviations from the intended interventions (*effect of adhering to intervention*)

| Signalling questions                                                          | Comments | Response options |
|-------------------------------------------------------------------------------|----------|------------------|
| 2.1. Were participants aware of their assigned intervention during the trial? | N/A      | N/A              |

|                                                                                                                                                    |     |     |
|----------------------------------------------------------------------------------------------------------------------------------------------------|-----|-----|
| 2.2. Were carers and people delivering the interventions aware of participants' assigned intervention during the trial?                            |     | N/A |
| 2.3. [If applicable:] <u>If Y/PY/NI to 2.1 or 2.2</u> : Were important non-protocol interventions balanced across intervention groups?             | N/A | N/A |
| 2.4. [If applicable:] Were there failures in implementing the intervention that could have affected the outcome?                                   | N/A | N/A |
| 2.5. [If applicable:] Was there non-adherence to the assigned intervention regimen that could have affected participants' outcomes?                | N/A | Y   |
| 2.6. <u>If N/PN/NI to 2.3, or Y/PY/NI to 2.4 or 2.5</u> : Was an appropriate analysis used to estimate the effect of adhering to the intervention? | N/A | N/A |
| Risk-of-bias judgement                                                                                                                             | N/A | N/A |
| Optional: What is the predicted direction of bias due to deviations from intended interventions?                                                   | N/A | N/A |

Domain 3: Missing outcome data

| Signalling questions                                                                                     | Comments | Response options |
|----------------------------------------------------------------------------------------------------------|----------|------------------|
| 3.1 Were data for this outcome available for all, or nearly all, participants randomized?                |          | Y                |
| 3.2 <u>If N/PN/NI to 3.1</u> : Is there evidence that the result was not biased by missing outcome data? | N/A      | N/A              |
| 3.3 <u>If N/PN to 3.2</u> : Could missingness in the outcome depend on its true value?                   | N/A      | N/A              |
| 3.4 <u>If Y/PY/NI to 3.3</u> : Is it likely that missingness in the outcome depended on its true value?  |          | N/A              |
| Risk-of-bias judgement                                                                                   |          | Low              |
| Optional: What is the predicted direction of bias due to missing outcome data?                           |          | NA               |



Domain 4: Risk of bias in measurement of the outcome

| Signalling questions                                                                                                            | Comments | Response options |
|---------------------------------------------------------------------------------------------------------------------------------|----------|------------------|
| 4.1 Was the method of measuring the outcome inappropriate?                                                                      |          | <u>N</u>         |
| 4.2 Could measurement or ascertainment of the outcome have differed between intervention groups?                                |          | <u>N</u>         |
| 4.3 If <u>N/PN/NI</u> to 4.1 and 4.2: Were outcome assessors aware of the intervention received by study participants?          |          | <u>PN</u>        |
| 4.4 If <u>Y/PY/NI</u> to 4.3: Could assessment of the outcome have been influenced by knowledge of intervention received?       |          | N/A              |
| 4.5 If <u>Y/PY/NI</u> to 4.4: Is it likely that assessment of the outcome was influenced by knowledge of intervention received? |          | N/A              |
| <b>Risk-of-bias judgement</b>                                                                                                   |          | Low              |
| Optional: What is the predicted direction of bias in measurement of the outcome?                                                |          | NA               |

Domain 5: Risk of bias in selection of the reported result

| Signalling questions                                                                                                                                                                | Comments | Response options |
|-------------------------------------------------------------------------------------------------------------------------------------------------------------------------------------|----------|------------------|
| 5.1 Were the data that produced this result analysed in accordance with a pre-specified analysis plan that was finalized before unblinded outcome data were available for analysis? |          | <u>PY</u>        |
| Is the numerical result being assessed likely to have been selected, on the basis of the results, from...                                                                           |          |                  |
| 5.2. ... multiple eligible outcome measurements (e.g. scales, definitions, time points) within the outcome domain?                                                                  |          | <u>N</u>         |
| 5.3 ... multiple eligible analyses of the data?                                                                                                                                     |          | <u>N</u>         |
| <b>Risk-of-bias judgement</b>                                                                                                                                                       |          | Low              |
| Optional: What is the predicted direction of bias due to selection of the reported result?                                                                                          |          | NA               |

Overall risk of bias

|                                                                             |  |     |
|-----------------------------------------------------------------------------|--|-----|
| <b>Risk-of-bias judgement</b>                                               |  | Low |
| Optional: What is the overall predicted direction of bias for this outcome? |  | NA  |

## Study details

### Reference

Kim JW, Lim DS, Sun K, Shim WJ, Rho YM. Stenting or MIDCAB using ministernotomy for revas anterior descending artery? Int J Cardiol. 2005 Mar;99(3):437–41.

### Study design

- Individually-randomized parallel-group trial
- Cluster-randomized parallel-group trial
- Individually randomized cross-over (or other matched) trial

For the purposes of this assessment, the interventions being compared are defined as

Experimental:  Comparator:

Specify which outcome is being assessed for risk of bias

Specify the numerical result being assessed. In case of multiple alternative analyses being presented, specify the numeric result (e.g. RR = 1.52 (95% CI 0.83 to 2.77) and/or a reference (e.g. to a table, figure or paragraph) that uniquely defines the result being assessed.

Is the review team's aim for this result...?

- to assess the effect of *assignment to intervention* (the 'intention-to-treat' effect)
- to assess the effect of *adhering to intervention* (the 'per-protocol' effect)

If the aim is to assess the effect of *adhering to intervention*, select the deviations from intended intervention that should be addressed (at least one must be checked):

- occurrence of non-protocol interventions
- failures in implementing the intervention that could have affected the outcome
- non-adherence to their assigned intervention by trial participants

Which of the following sources were obtained to help inform the risk-of-bias assessment? (tick as many as apply)

- Journal article(s) with results of the trial
- Trial protocol
- Statistical analysis plan (SAP)
- Non-commercial trial registry record (e.g. ClinicalTrials.gov record)
- Company-owned trial registry record (e.g. GSK Clinical Study Register record)
- "Grey literature" (e.g. unpublished thesis)
- Conference abstract(s) about the trial
- Regulatory document (e.g. Clinical Study Report, Drug Approval Package)
- Research ethics application
- Grant database summary (e.g. NIH RePORTER or Research Councils UK Gateway to Research)
- Personal communication with trialist
- Personal communication with the sponsor

Risk of bias assessment

Responses underlined in green are potential markers for low risk of bias, and responses in red are potential markers for a risk of bias. Where questions relate only to sign posts to other questions, no formatting is used.

Domain 1: Risk of bias arising from the randomization process

| Signalling questions                                                                                       | Comments | Response options |
|------------------------------------------------------------------------------------------------------------|----------|------------------|
| 1.1 Was the allocation sequence random?                                                                    |          | <u>Y</u>         |
| 1.2 Was the allocation sequence concealed until participants were enrolled and assigned to interventions?  |          | <u>Y</u>         |
| 1.3 Did baseline differences between intervention groups suggest a problem with the randomization process? |          | <u>N</u>         |
| Risk-of-bias judgement                                                                                     |          | Low              |
| Optional: What is the predicted direction of bias arising from the randomization process?                  |          | Unpredictable    |

Domain 2: Risk of bias due to deviations from the intended interventions (*effect of assignment to intervention*)

| Signalling questions                                                                                                                                                          | Comments | Response options |
|-------------------------------------------------------------------------------------------------------------------------------------------------------------------------------|----------|------------------|
| 2.1. Were participants aware of their assigned intervention during the trial?                                                                                                 |          | Y                |
| 2.2. Were carers and people delivering the interventions aware of participants' assigned intervention during the trial?                                                       |          | Y                |
| 2.3. If <u>Y/PY/NI</u> to 2.1 or 2.2: Were there deviations from the intended intervention that arose because of the trial context?                                           |          | Y                |
| 2.4 If <u>Y/PY</u> to 2.3: Were these deviations likely to have affected the outcome?                                                                                         |          | <u>PY</u>        |
| 2.5. If <u>Y/PY/NI</u> to 2.4: Were these deviations from intended intervention balanced between groups?                                                                      |          | <u>Y</u>         |
| 2.6 Was an appropriate analysis used to estimate the effect of assignment to intervention?                                                                                    |          | <u>Y</u>         |
| 2.7 If <u>N/PN/NI</u> to 2.6: Was there potential for a substantial impact (on the result) of the failure to analyse participants in the group to which they were randomized? |          | PY               |
| Risk-of-bias judgement                                                                                                                                                        |          | Some concerns    |
| Optional: What is the predicted direction of bias due to deviations from intended interventions?                                                                              |          | Unpredictable    |

Domain 2: Risk of bias due to deviations from the intended interventions (*effect of adhering to intervention*)

| Signalling questions                                                          | Comments | Response options |
|-------------------------------------------------------------------------------|----------|------------------|
| 2.1. Were participants aware of their assigned intervention during the trial? | N/A      | N/A              |

|                                                                                                                                                    |     |     |
|----------------------------------------------------------------------------------------------------------------------------------------------------|-----|-----|
| 2.2. Were carers and people delivering the interventions aware of participants' assigned intervention during the trial?                            |     | N/A |
| 2.3. [If applicable:] <u>If Y/PY/NI to 2.1 or 2.2</u> : Were important non-protocol interventions balanced across intervention groups?             | N/A | N/A |
| 2.4. [If applicable:] Were there failures in implementing the intervention that could have affected the outcome?                                   | N/A | N/A |
| 2.5. [If applicable:] Was there non-adherence to the assigned intervention regimen that could have affected participants' outcomes?                | N/A | Y   |
| 2.6. <u>If N/PN/NI to 2.3, or Y/PY/NI to 2.4 or 2.5</u> : Was an appropriate analysis used to estimate the effect of adhering to the intervention? | N/A | N/A |
| Risk-of-bias judgement                                                                                                                             | N/A | N/A |
| Optional: What is the predicted direction of bias due to deviations from intended interventions?                                                   | N/A | N/A |

Domain 3: Missing outcome data

| Signalling questions                                                                                     | Comments | Response options |
|----------------------------------------------------------------------------------------------------------|----------|------------------|
| 3.1 Were data for this outcome available for all, or nearly all, participants randomized?                |          | Y                |
| 3.2 <u>If N/PN/NI to 3.1</u> : Is there evidence that the result was not biased by missing outcome data? | N/A      | N/A              |
| 3.3 <u>If N/PN to 3.2</u> : Could missingness in the outcome depend on its true value?                   | N/A      | N/A              |
| 3.4 <u>If Y/PY/NI to 3.3</u> : Is it likely that missingness in the outcome depended on its true value?  |          | N/A              |
| Risk-of-bias judgement                                                                                   |          | Low              |
| Optional: What is the predicted direction of bias due to missing outcome data?                           |          | NA               |

Domain 4: Risk of bias in measurement of the outcome

| Signalling questions                                                                                                            | Comments | Response options |
|---------------------------------------------------------------------------------------------------------------------------------|----------|------------------|
| 4.1 Was the method of measuring the outcome inappropriate?                                                                      |          | <u>N</u>         |
| 4.2 Could measurement or ascertainment of the outcome have differed between intervention groups?                                |          | <u>N</u>         |
| 4.3 If <u>N/PN/NI</u> to 4.1 and 4.2: Were outcome assessors aware of the intervention received by study participants?          |          | <u>PN</u>        |
| 4.4 If <u>Y/PY/NI</u> to 4.3: Could assessment of the outcome have been influenced by knowledge of intervention received?       |          | N/A              |
| 4.5 If <u>Y/PY/NI</u> to 4.4: Is it likely that assessment of the outcome was influenced by knowledge of intervention received? |          | N/A              |
| <b>Risk-of-bias judgement</b>                                                                                                   |          | Low              |
| Optional: What is the predicted direction of bias in measurement of the outcome?                                                |          | NA               |

Domain 5: Risk of bias in selection of the reported result

| Signalling questions                                                                                                                                                                | Comments | Response options |
|-------------------------------------------------------------------------------------------------------------------------------------------------------------------------------------|----------|------------------|
| 5.1 Were the data that produced this result analysed in accordance with a pre-specified analysis plan that was finalized before unblinded outcome data were available for analysis? |          | <u>PY</u>        |
| Is the numerical result being assessed likely to have been selected, on the basis of the results, from...                                                                           |          |                  |
| 5.2. ... multiple eligible outcome measurements (e.g. scales, definitions, time points) within the outcome domain?                                                                  |          | <u>N</u>         |
| 5.3 ... multiple eligible analyses of the data?                                                                                                                                     |          | <u>N</u>         |
| <b>Risk-of-bias judgement</b>                                                                                                                                                       |          | Low              |
| Optional: What is the predicted direction of bias due to selection of the reported result?                                                                                          |          | NA               |

Overall risk of bias

|                                                                             |  |     |
|-----------------------------------------------------------------------------|--|-----|
| <b>Risk-of-bias judgement</b>                                               |  | Low |
| Optional: What is the overall predicted direction of bias for this outcome? |  | NA  |

## Study details

### Reference

Ahn J-M, Roh J-H, Kim Y-H, Park D-W, Yun S-C, Lee PH, et al. Randomized Trial of Stents Versus Main Coronary Artery Disease: 5-Year Outcomes of the PRECOMBAT Study. *J Am Coll Cardiol.* 206.

## Study design

- Individually-randomized parallel-group trial
- Cluster-randomized parallel-group trial
- Individually randomized cross-over (or other matched) trial

For the purposes of this assessment, the interventions being compared are defined as

Experimental:  Comparator:

Specify which outcome is being assessed for risk of bias

Specify the numerical result being assessed. In case of multiple alternative analyses being presented, specify the numeric result (e.g. RR = 1.52 (95% CI 0.83 to 2.77) and/or a reference (e.g. to a table, figure or paragraph) that uniquely defines the result being assessed.

Is the review team's aim for this result...?

- to assess the effect of *assignment to intervention* (the 'intention-to-treat' effect)
- to assess the effect of *adhering to intervention* (the 'per-protocol' effect)

If the aim is to assess the effect of *adhering to intervention*, select the deviations from intended intervention that should be addressed (at least one must be checked):

- occurrence of non-protocol interventions
- failures in implementing the intervention that could have affected the outcome
- non-adherence to their assigned intervention by trial participants

Which of the following sources were obtained to help inform the risk-of-bias assessment? (tick as many as apply)

- Journal article(s) with results of the trial
- Trial protocol
- Statistical analysis plan (SAP)
- Non-commercial trial registry record (e.g. ClinicalTrials.gov record)
- Company-owned trial registry record (e.g. GSK Clinical Study Register record)
- "Grey literature" (e.g. unpublished thesis)
- Conference abstract(s) about the trial
- Regulatory document (e.g. Clinical Study Report, Drug Approval Package)
- Research ethics application
- Grant database summary (e.g. NIH RePORTER or Research Councils UK Gateway to Research)
- Personal communication with trialist
- Personal communication with the sponsor

Risk of bias assessment

Responses underlined in green are potential markers for low risk of bias, and responses in **red** are potential markers for a risk of bias. Where questions relate only to sign posts to other questions, no formatting is used.

Domain 1: Risk of bias arising from the randomization process

| Signalling questions                                                                                       | Comments | Response options |
|------------------------------------------------------------------------------------------------------------|----------|------------------|
| 1.1 Was the allocation sequence random?                                                                    |          | <u>Y</u>         |
| 1.2 Was the allocation sequence concealed until participants were enrolled and assigned to interventions?  |          | <u>Y</u>         |
| 1.3 Did baseline differences between intervention groups suggest a problem with the randomization process? |          | <u>N</u>         |
| Risk-of-bias judgement                                                                                     |          | Low              |
| Optional: What is the predicted direction of bias arising from the randomization process?                  |          | Unpredictable    |

Domain 2: Risk of bias due to deviations from the intended interventions (*effect of assignment to intervention*)

| Signalling questions                                                                                                                                                          | Comments | Response options |
|-------------------------------------------------------------------------------------------------------------------------------------------------------------------------------|----------|------------------|
| 2.1. Were participants aware of their assigned intervention during the trial?                                                                                                 |          | <b>Y</b>         |
| 2.2. Were carers and people delivering the interventions aware of participants' assigned intervention during the trial?                                                       |          | <b>Y</b>         |
| 2.3. If <b>Y/PY/NI</b> to 2.1 or 2.2: Were there deviations from the intended intervention that arose because of the trial context?                                           |          | <b>Y</b>         |
| 2.4 If <b>Y/PY</b> to 2.3: Were these deviations likely to have affected the outcome?                                                                                         |          | <b><u>PY</u></b> |
| 2.5. If <b>Y/PY/NI</b> to 2.4: Were these deviations from intended intervention balanced between groups?                                                                      |          | <u>Y</u>         |
| 2.6 Was an appropriate analysis used to estimate the effect of assignment to intervention?                                                                                    |          | <u>Y</u>         |
| 2.7 If <b>N/PN/NI</b> to 2.6: Was there potential for a substantial impact (on the result) of the failure to analyse participants in the group to which they were randomized? |          | <b>PY</b>        |
| Risk-of-bias judgement                                                                                                                                                        |          | Some concerns    |
| Optional: What is the predicted direction of bias due to deviations from intended interventions?                                                                              |          | Unpredictable    |

Domain 2: Risk of bias due to deviations from the intended interventions (*effect of adhering to intervention*)

| Signalling questions                                                          | Comments | Response options |
|-------------------------------------------------------------------------------|----------|------------------|
| 2.1. Were participants aware of their assigned intervention during the trial? | N/A      | N/A              |

|                                                                                                                                                   |     |     |
|---------------------------------------------------------------------------------------------------------------------------------------------------|-----|-----|
| 2.2. Were carers and people delivering the interventions aware of participants' assigned intervention during the trial?                           |     | N/A |
| 2.3. [If applicable:] <u>If Y/PY/NI to 2.1 or 2.2:</u> Were important non-protocol interventions balanced across intervention groups?             | N/A | N/A |
| 2.4. [If applicable:] Were there failures in implementing the intervention that could have affected the outcome?                                  | N/A | N/A |
| 2.5. [If applicable:] Was there non-adherence to the assigned intervention regimen that could have affected participants' outcomes?               | N/A | Y   |
| 2.6. <u>If N/PN/NI to 2.3, or Y/PY/NI to 2.4 or 2.5:</u> Was an appropriate analysis used to estimate the effect of adhering to the intervention? | N/A | N/A |
| Risk-of-bias judgement                                                                                                                            | N/A | N/A |
| Optional: What is the predicted direction of bias due to deviations from intended interventions?                                                  | N/A | N/A |

Domain 3: Missing outcome data

| Signalling questions                                                                                    | Comments | Response options |
|---------------------------------------------------------------------------------------------------------|----------|------------------|
| 3.1 Were data for this outcome available for all, or nearly all, participants randomized?               |          | Y                |
| 3.2 <u>If N/PN/NI to 3.1:</u> Is there evidence that the result was not biased by missing outcome data? | N/A      | N/A              |
| 3.3 <u>If N/PN to 3.2:</u> Could missingness in the outcome depend on its true value?                   | N/A      | N/A              |
| 3.4 <u>If Y/PY/NI to 3.3:</u> Is it likely that missingness in the outcome depended on its true value?  |          | N/A              |
| Risk-of-bias judgement                                                                                  |          | Low              |
| Optional: What is the predicted direction of bias due to missing outcome data?                          |          | NA               |



Domain 4: Risk of bias in measurement of the outcome

| Signalling questions                                                                                                            | Comments | Response options |
|---------------------------------------------------------------------------------------------------------------------------------|----------|------------------|
| 4.1 Was the method of measuring the outcome inappropriate?                                                                      |          | <u>N</u>         |
| 4.2 Could measurement or ascertainment of the outcome have differed between intervention groups?                                |          | <u>N</u>         |
| 4.3 If <u>N/PN/NI</u> to 4.1 and 4.2: Were outcome assessors aware of the intervention received by study participants?          |          | <u>PN</u>        |
| 4.4 If <u>Y/PY/NI</u> to 4.3: Could assessment of the outcome have been influenced by knowledge of intervention received?       |          | N/A              |
| 4.5 If <u>Y/PY/NI</u> to 4.4: Is it likely that assessment of the outcome was influenced by knowledge of intervention received? |          | N/A              |
| <b>Risk-of-bias judgement</b>                                                                                                   |          | Low              |
| Optional: What is the predicted direction of bias in measurement of the outcome?                                                |          | NA               |

Domain 5: Risk of bias in selection of the reported result

| Signalling questions                                                                                                                                                                | Comments | Response options |
|-------------------------------------------------------------------------------------------------------------------------------------------------------------------------------------|----------|------------------|
| 5.1 Were the data that produced this result analysed in accordance with a pre-specified analysis plan that was finalized before unblinded outcome data were available for analysis? |          | <u>PY</u>        |
| Is the numerical result being assessed likely to have been selected, on the basis of the results, from...                                                                           |          |                  |
| 5.2. ... multiple eligible outcome measurements (e.g. scales, definitions, time points) within the outcome domain?                                                                  |          | <u>N</u>         |
| 5.3 ... multiple eligible analyses of the data?                                                                                                                                     |          | <u>N</u>         |
| <b>Risk-of-bias judgement</b>                                                                                                                                                       |          | Low              |
| Optional: What is the predicted direction of bias due to selection of the reported result?                                                                                          |          | NA               |

Overall risk of bias

|                                                                             |  |     |
|-----------------------------------------------------------------------------|--|-----|
| <b>Risk-of-bias judgement</b>                                               |  | Low |
| Optional: What is the overall predicted direction of bias for this outcome? |  | NA  |

## Study details

### Reference

Pohl T, Giehl W, Reichart B, Kupatt C, Raake P, Paul S, et al. Retroinfusion-supported stenting percutaneous intervention and bypass surgery: Results of the prospective randomized myopr Cardiovasc Interv. 2004 Jul;62(3):323–30.

### Study design

- Individually-randomized parallel-group trial
- Cluster-randomized parallel-group trial
- Individually randomized cross-over (or other matched) trial

For the purposes of this assessment, the interventions being compared are defined as

Experimental:  Comparator:

Specify which outcome is being assessed for risk of bias

Specify the numerical result being assessed. In case of multiple alternative analyses being presented, specify the numeric result (e.g. RR = 1.52 (95% CI 0.83 to 2.77) and/or a reference (e.g. to a table, figure or paragraph) that uniquely defines the result being assessed.

Is the review team's aim for this result...?

- to assess the effect of *assignment to intervention* (the 'intention-to-treat' effect)
- to assess the effect of *adhering to intervention* (the 'per-protocol' effect)

If the aim is to assess the effect of *adhering to intervention*, select the deviations from intended intervention that should be addressed (at least one must be checked):

- occurrence of non-protocol interventions
- failures in implementing the intervention that could have affected the outcome
- non-adherence to their assigned intervention by trial participants

Which of the following sources were obtained to help inform the risk-of-bias assessment? (tick as many as apply)

- Journal article(s) with results of the trial
- Trial protocol
- Statistical analysis plan (SAP)
- Non-commercial trial registry record (e.g. ClinicalTrials.gov record)
- Company-owned trial registry record (e.g. GSK Clinical Study Register record)
- "Grey literature" (e.g. unpublished thesis)
- Conference abstract(s) about the trial
- Regulatory document (e.g. Clinical Study Report, Drug Approval Package)
- Research ethics application
- Grant database summary (e.g. NIH RePORTER or Research Councils UK Gateway to Research)
- Personal communication with trialist
- Personal communication with the sponsor

Risk of bias assessment

Responses underlined in green are potential markers for low risk of bias, and responses in red are potential markers for a risk of bias. Where questions relate only to sign posts to other questions, no formatting is used.

Domain 1: Risk of bias arising from the randomization process

| Signalling questions                                                                                       | Comments | Response options |
|------------------------------------------------------------------------------------------------------------|----------|------------------|
| 1.1 Was the allocation sequence random?                                                                    |          | <u>Y</u>         |
| 1.2 Was the allocation sequence concealed until participants were enrolled and assigned to interventions?  |          | <u>Y</u>         |
| 1.3 Did baseline differences between intervention groups suggest a problem with the randomization process? |          | <u>N</u>         |
| Risk-of-bias judgement                                                                                     |          | Low              |
| Optional: What is the predicted direction of bias arising from the randomization process?                  |          | Unpredictable    |

Domain 2: Risk of bias due to deviations from the intended interventions (*effect of assignment to intervention*)

| Signalling questions                                                                                                                                                          | Comments | Response options |
|-------------------------------------------------------------------------------------------------------------------------------------------------------------------------------|----------|------------------|
| 2.1. Were participants aware of their assigned intervention during the trial?                                                                                                 |          | Y                |
| 2.2. Were carers and people delivering the interventions aware of participants' assigned intervention during the trial?                                                       |          | Y                |
| 2.3. If <u>Y/PY/NI</u> to 2.1 or 2.2: Were there deviations from the intended intervention that arose because of the trial context?                                           |          | Y                |
| 2.4 If <u>Y/PY</u> to 2.3: Were these deviations likely to have affected the outcome?                                                                                         |          | <u>PY</u>        |
| 2.5. If <u>Y/PY/NI</u> to 2.4: Were these deviations from intended intervention balanced between groups?                                                                      |          | <u>Y</u>         |
| 2.6 Was an appropriate analysis used to estimate the effect of assignment to intervention?                                                                                    |          | <u>Y</u>         |
| 2.7 If <u>N/PN/NI</u> to 2.6: Was there potential for a substantial impact (on the result) of the failure to analyse participants in the group to which they were randomized? |          | PY               |
| Risk-of-bias judgement                                                                                                                                                        |          | Some concerns    |
| Optional: What is the predicted direction of bias due to deviations from intended interventions?                                                                              |          | Unpredictable    |

Domain 2: Risk of bias due to deviations from the intended interventions (*effect of adhering to intervention*)

| Signalling questions                                                          | Comments | Response options |
|-------------------------------------------------------------------------------|----------|------------------|
| 2.1. Were participants aware of their assigned intervention during the trial? | N/A      | N/A              |

|                                                                                                                                                   |     |     |
|---------------------------------------------------------------------------------------------------------------------------------------------------|-----|-----|
| 2.2. Were carers and people delivering the interventions aware of participants' assigned intervention during the trial?                           |     | N/A |
| 2.3. [If applicable:] <u>If Y/PY/NI to 2.1 or 2.2:</u> Were important non-protocol interventions balanced across intervention groups?             | N/A | N/A |
| 2.4. [If applicable:] Were there failures in implementing the intervention that could have affected the outcome?                                  | N/A | N/A |
| 2.5. [If applicable:] Was there non-adherence to the assigned intervention regimen that could have affected participants' outcomes?               | N/A | Y   |
| 2.6. <u>If N/PN/NI to 2.3, or Y/PY/NI to 2.4 or 2.5:</u> Was an appropriate analysis used to estimate the effect of adhering to the intervention? | N/A | N/A |
| Risk-of-bias judgement                                                                                                                            | N/A | N/A |
| Optional: What is the predicted direction of bias due to deviations from intended interventions?                                                  | N/A | N/A |

Domain 3: Missing outcome data

| Signalling questions                                                                                    | Comments | Response options |
|---------------------------------------------------------------------------------------------------------|----------|------------------|
| 3.1 Were data for this outcome available for all, or nearly all, participants randomized?               |          | Y                |
| 3.2 <u>If N/PN/NI to 3.1:</u> Is there evidence that the result was not biased by missing outcome data? | N/A      | N/A              |
| 3.3 <u>If N/PN to 3.2:</u> Could missingness in the outcome depend on its true value?                   | N/A      | N/A              |
| 3.4 <u>If Y/PY/NI to 3.3:</u> Is it likely that missingness in the outcome depended on its true value?  |          | N/A              |
| Risk-of-bias judgement                                                                                  |          | Low              |
| Optional: What is the predicted direction of bias due to missing outcome data?                          |          | NA               |

Domain 4: Risk of bias in measurement of the outcome

| Signalling questions                                                                                                            | Comments | Response options |
|---------------------------------------------------------------------------------------------------------------------------------|----------|------------------|
| 4.1 Was the method of measuring the outcome inappropriate?                                                                      |          | <u>N</u>         |
| 4.2 Could measurement or ascertainment of the outcome have differed between intervention groups?                                |          | <u>N</u>         |
| 4.3 If <u>N/PN/NI</u> to 4.1 and 4.2: Were outcome assessors aware of the intervention received by study participants?          |          | <u>PN</u>        |
| 4.4 If <u>Y/PY/NI</u> to 4.3: Could assessment of the outcome have been influenced by knowledge of intervention received?       |          | N/A              |
| 4.5 If <u>Y/PY/NI</u> to 4.4: Is it likely that assessment of the outcome was influenced by knowledge of intervention received? |          | N/A              |
| <b>Risk-of-bias judgement</b>                                                                                                   |          | Low              |
| Optional: What is the predicted direction of bias in measurement of the outcome?                                                |          | NA               |

Domain 5: Risk of bias in selection of the reported result

| Signalling questions                                                                                                                                                                | Comments | Response options |
|-------------------------------------------------------------------------------------------------------------------------------------------------------------------------------------|----------|------------------|
| 5.1 Were the data that produced this result analysed in accordance with a pre-specified analysis plan that was finalized before unblinded outcome data were available for analysis? |          | <u>PY</u>        |
| Is the numerical result being assessed likely to have been selected, on the basis of the results, from...                                                                           |          |                  |
| 5.2. ... multiple eligible outcome measurements (e.g. scales, definitions, time points) within the outcome domain?                                                                  |          | <u>N</u>         |
| 5.3 ... multiple eligible analyses of the data?                                                                                                                                     |          | <u>N</u>         |
| <b>Risk-of-bias judgement</b>                                                                                                                                                       |          | Low              |
| Optional: What is the predicted direction of bias due to selection of the reported result?                                                                                          |          | NA               |

Overall risk of bias

|                                                                             |  |     |
|-----------------------------------------------------------------------------|--|-----|
| <b>Risk-of-bias judgement</b>                                               |  | Low |
| Optional: What is the overall predicted direction of bias for this outcome? |  | NA  |

## Study details

### Reference

Thiele H, Neumann-Schniedewind P, Jacobs S, Boudriot E, Walther T, Mohr F-W, et al. Randomized Comparison of Minimally Invasive Direct Coronary Artery Bypass Surgery Versus Sirolimus-Eluting Stenting in Anterior Descending Coronary Artery Stenosis. *J Am Coll Cardiol*. 2009 Jun;53(25):2324–31.

### Study design

- Individually-randomized parallel-group trial
- Cluster-randomized parallel-group trial
- Individually randomized cross-over (or other matched) trial

### For the purposes of this assessment, the interventions being compared are defined as

Experimental:  Comparator:

### Specify which outcome is being assessed for risk of bias

**Specify the numerical result being assessed.** In case of multiple alternative analyses being presented, specify the numeric result (e.g. RR = 1.52 (95% CI 0.83 to 2.77) and/or a reference (e.g. to a table, figure or paragraph) that uniquely defines the result being assessed.

### Is the review team's aim for this result...?

- to assess the effect of *assignment to intervention* (the 'intention-to-treat' effect)
- to assess the effect of *adhering to intervention* (the 'per-protocol' effect)

**If the aim is to assess the effect of *adhering to intervention***, select the deviations from intended intervention that should be addressed (at least one must be checked):

- occurrence of non-protocol interventions
- failures in implementing the intervention that could have affected the outcome
- non-adherence to their assigned intervention by trial participants

### Which of the following sources were obtained to help inform the risk-of-bias assessment? (tick as many as apply)

- Journal article(s) with results of the trial
- Trial protocol
- Statistical analysis plan (SAP)
- Non-commercial trial registry record (e.g. ClinicalTrials.gov record)
- Company-owned trial registry record (e.g. GSK Clinical Study Register record)
- "Grey literature" (e.g. unpublished thesis)
- Conference abstract(s) about the trial
- Regulatory document (e.g. Clinical Study Report, Drug Approval Package)
- Research ethics application
- Grant database summary (e.g. NIH RePORTER or Research Councils UK Gateway to Research)
- Personal communication with trialist
- Personal communication with the sponsor

Risk of bias assessment

Responses underlined in green are potential markers for low risk of bias, and responses in **red** are potential markers for a risk of bias. Where questions relate only to sign posts to other questions, no formatting is used.

Domain 1: Risk of bias arising from the randomization process

| Signalling questions                                                                                       | Comments | Response options |
|------------------------------------------------------------------------------------------------------------|----------|------------------|
| 1.1 Was the allocation sequence random?                                                                    |          | <u>Y</u>         |
| 1.2 Was the allocation sequence concealed until participants were enrolled and assigned to interventions?  |          | <u>Y</u>         |
| 1.3 Did baseline differences between intervention groups suggest a problem with the randomization process? |          | <u>N</u>         |
| Risk-of-bias judgement                                                                                     |          | Low              |
| Optional: What is the predicted direction of bias arising from the randomization process?                  |          | Unpredictable    |

Domain 2: Risk of bias due to deviations from the intended interventions (*effect of assignment to intervention*)

| Signalling questions                                                                                                                                                          | Comments | Response options |
|-------------------------------------------------------------------------------------------------------------------------------------------------------------------------------|----------|------------------|
| 2.1. Were participants aware of their assigned intervention during the trial?                                                                                                 |          | <b>Y</b>         |
| 2.2. Were carers and people delivering the interventions aware of participants' assigned intervention during the trial?                                                       |          | <b>Y</b>         |
| 2.3. If <b>Y/PY/NI</b> to 2.1 or 2.2: Were there deviations from the intended intervention that arose because of the trial context?                                           |          | <b>Y</b>         |
| 2.4 If <b>Y/PY</b> to 2.3: Were these deviations likely to have affected the outcome?                                                                                         |          | <b><u>PY</u></b> |
| 2.5. If <b>Y/PY/NI</b> to 2.4: Were these deviations from intended intervention balanced between groups?                                                                      |          | <u>Y</u>         |
| 2.6 Was an appropriate analysis used to estimate the effect of assignment to intervention?                                                                                    |          | <u>Y</u>         |
| 2.7 If <b>N/PN/NI</b> to 2.6: Was there potential for a substantial impact (on the result) of the failure to analyse participants in the group to which they were randomized? |          | <b>PY</b>        |
| Risk-of-bias judgement                                                                                                                                                        |          | Some concerns    |
| Optional: What is the predicted direction of bias due to deviations from intended interventions?                                                                              |          | Unpredictable    |

Domain 2: Risk of bias due to deviations from the intended interventions (*effect of adhering to intervention*)

| Signalling questions                                                          | Comments | Response options |
|-------------------------------------------------------------------------------|----------|------------------|
| 2.1. Were participants aware of their assigned intervention during the trial? | N/A      | N/A              |

|                                                                                                                                                    |     |     |
|----------------------------------------------------------------------------------------------------------------------------------------------------|-----|-----|
| 2.2. Were carers and people delivering the interventions aware of participants' assigned intervention during the trial?                            |     | N/A |
| 2.3. [If applicable:] <u>If Y/PY/NI to 2.1 or 2.2</u> : Were important non-protocol interventions balanced across intervention groups?             | N/A | N/A |
| 2.4. [If applicable:] Were there failures in implementing the intervention that could have affected the outcome?                                   | N/A | N/A |
| 2.5. [If applicable:] Was there non-adherence to the assigned intervention regimen that could have affected participants' outcomes?                | N/A | Y   |
| 2.6. <u>If N/PN/NI to 2.3, or Y/PY/NI to 2.4 or 2.5</u> : Was an appropriate analysis used to estimate the effect of adhering to the intervention? | N/A | N/A |
| Risk-of-bias judgement                                                                                                                             | N/A | N/A |
| Optional: What is the predicted direction of bias due to deviations from intended interventions?                                                   | N/A | N/A |

Domain 3: Missing outcome data

| Signalling questions                                                                                     | Comments | Response options |
|----------------------------------------------------------------------------------------------------------|----------|------------------|
| 3.1 Were data for this outcome available for all, or nearly all, participants randomized?                |          | Y                |
| 3.2 <u>If N/PN/NI to 3.1</u> : Is there evidence that the result was not biased by missing outcome data? | N/A      | N/A              |
| 3.3 <u>If N/PN to 3.2</u> : Could missingness in the outcome depend on its true value?                   | N/A      | N/A              |
| 3.4 <u>If Y/PY/NI to 3.3</u> : Is it likely that missingness in the outcome depended on its true value?  |          | N/A              |
| Risk-of-bias judgement                                                                                   |          | Low              |
| Optional: What is the predicted direction of bias due to missing outcome data?                           |          | NA               |



Domain 4: Risk of bias in measurement of the outcome

| Signalling questions                                                                                                            | Comments | Response options |
|---------------------------------------------------------------------------------------------------------------------------------|----------|------------------|
| 4.1 Was the method of measuring the outcome inappropriate?                                                                      |          | <u>N</u>         |
| 4.2 Could measurement or ascertainment of the outcome have differed between intervention groups?                                |          | <u>N</u>         |
| 4.3 If <u>N/PN/NI</u> to 4.1 and 4.2: Were outcome assessors aware of the intervention received by study participants?          |          | <u>PN</u>        |
| 4.4 If <u>Y/PY/NI</u> to 4.3: Could assessment of the outcome have been influenced by knowledge of intervention received?       |          | N/A              |
| 4.5 If <u>Y/PY/NI</u> to 4.4: Is it likely that assessment of the outcome was influenced by knowledge of intervention received? |          | N/A              |
| <b>Risk-of-bias judgement</b>                                                                                                   |          | Low              |
| Optional: What is the predicted direction of bias in measurement of the outcome?                                                |          | NA               |

Domain 5: Risk of bias in selection of the reported result

| Signalling questions                                                                                                                                                                | Comments | Response options |
|-------------------------------------------------------------------------------------------------------------------------------------------------------------------------------------|----------|------------------|
| 5.1 Were the data that produced this result analysed in accordance with a pre-specified analysis plan that was finalized before unblinded outcome data were available for analysis? |          | <u>PY</u>        |
| Is the numerical result being assessed likely to have been selected, on the basis of the results, from...                                                                           |          |                  |
| 5.2. ... multiple eligible outcome measurements (e.g. scales, definitions, time points) within the outcome domain?                                                                  |          | <u>N</u>         |
| 5.3 ... multiple eligible analyses of the data?                                                                                                                                     |          | <u>N</u>         |
| <b>Risk-of-bias judgement</b>                                                                                                                                                       |          | Low              |
| Optional: What is the predicted direction of bias due to selection of the reported result?                                                                                          |          | NA               |

Overall risk of bias

|                                                                             |  |     |
|-----------------------------------------------------------------------------|--|-----|
| <b>Risk-of-bias judgement</b>                                               |  | Low |
| Optional: What is the overall predicted direction of bias for this outcome? |  | NA  |

## Study details

### Reference

Goy J-J, Kaufmann U, Hurni M, Cook S, Versaci F, Ruchat P, et al. 10-year follow-up of a prospective trial comparing bare-metal stenting with internal mammary artery grafting for proximal, isolated coronary artery stenosis the SIMA (Stenting versus Internal Mammary Artery grafting) trial. *JAMA* 2014;312(10):815–7.

## Study design

- Individually-randomized parallel-group trial
- Cluster-randomized parallel-group trial
- Individually randomized cross-over (or other matched) trial

## For the purposes of this assessment, the interventions being compared are defined as

Experimental:  Comparator:

## Specify which outcome is being assessed for risk of bias

**Specify the numerical result being assessed.** In case of multiple alternative analyses being presented, specify the numeric result (e.g. RR = 1.52 (95% CI 0.83 to 2.77) and/or a reference (e.g. to a table, figure or paragraph) that uniquely defines the result being assessed.

## Is the review team's aim for this result...?

- to assess the effect of *assignment to intervention* (the 'intention-to-treat' effect)
- to assess the effect of *adhering to intervention* (the 'per-protocol' effect)

**If the aim is to assess the effect of *adhering to intervention***, select the deviations from intended intervention that should be addressed (at least one must be checked):

- occurrence of non-protocol interventions
- failures in implementing the intervention that could have affected the outcome
- non-adherence to their assigned intervention by trial participants

## Which of the following sources were obtained to help inform the risk-of-bias assessment? (tick as many as apply)

- Journal article(s) with results of the trial
- Trial protocol
- Statistical analysis plan (SAP)
- Non-commercial trial registry record (e.g. ClinicalTrials.gov record)
- Company-owned trial registry record (e.g. GSK Clinical Study Register record)
- "Grey literature" (e.g. unpublished thesis)
- Conference abstract(s) about the trial
- Regulatory document (e.g. Clinical Study Report, Drug Approval Package)
- Research ethics application
- Grant database summary (e.g. NIH RePORTER or Research Councils UK Gateway to Research)
- Personal communication with trialist
- Personal communication with the sponsor

Risk of bias assessment

Responses underlined in green are potential markers for low risk of bias, and responses in **red** are potential markers for a risk of bias. Where questions relate only to sign posts to other questions, no formatting is used.

Domain 1: Risk of bias arising from the randomization process

| Signalling questions                                                                                       | Comments | Response options |
|------------------------------------------------------------------------------------------------------------|----------|------------------|
| 1.1 Was the allocation sequence random?                                                                    |          | <u>Y</u>         |
| 1.2 Was the allocation sequence concealed until participants were enrolled and assigned to interventions?  |          | <u>Y</u>         |
| 1.3 Did baseline differences between intervention groups suggest a problem with the randomization process? |          | <u>N</u>         |
| Risk-of-bias judgement                                                                                     |          | Low              |
| Optional: What is the predicted direction of bias arising from the randomization process?                  |          | Unpredictable    |

Domain 2: Risk of bias due to deviations from the intended interventions (*effect of assignment to intervention*)

| Signalling questions                                                                                                                                                          | Comments | Response options |
|-------------------------------------------------------------------------------------------------------------------------------------------------------------------------------|----------|------------------|
| 2.1. Were participants aware of their assigned intervention during the trial?                                                                                                 |          | <b>Y</b>         |
| 2.2. Were carers and people delivering the interventions aware of participants' assigned intervention during the trial?                                                       |          | <b>Y</b>         |
| 2.3. If <b>Y/PY/NI</b> to 2.1 or 2.2: Were there deviations from the intended intervention that arose because of the trial context?                                           |          | <b>Y</b>         |
| 2.4 If <b>Y/PY</b> to 2.3: Were these deviations likely to have affected the outcome?                                                                                         |          | <b><u>PY</u></b> |
| 2.5. If <b>Y/PY/NI</b> to 2.4: Were these deviations from intended intervention balanced between groups?                                                                      |          | <u>Y</u>         |
| 2.6 Was an appropriate analysis used to estimate the effect of assignment to intervention?                                                                                    |          | <u>Y</u>         |
| 2.7 If <b>N/PN/NI</b> to 2.6: Was there potential for a substantial impact (on the result) of the failure to analyse participants in the group to which they were randomized? |          | <b>PY</b>        |
| Risk-of-bias judgement                                                                                                                                                        |          | Some concerns    |
| Optional: What is the predicted direction of bias due to deviations from intended interventions?                                                                              |          | Unpredictable    |

Domain 2: Risk of bias due to deviations from the intended interventions (*effect of adhering to intervention*)

| Signalling questions                                                          | Comments | Response options |
|-------------------------------------------------------------------------------|----------|------------------|
| 2.1. Were participants aware of their assigned intervention during the trial? | N/A      | N/A              |

|                                                                                                                                                   |     |     |
|---------------------------------------------------------------------------------------------------------------------------------------------------|-----|-----|
| 2.2. Were carers and people delivering the interventions aware of participants' assigned intervention during the trial?                           |     | N/A |
| 2.3. [If applicable:] <u>If Y/PY/NI to 2.1 or 2.2:</u> Were important non-protocol interventions balanced across intervention groups?             | N/A | N/A |
| 2.4. [If applicable:] Were there failures in implementing the intervention that could have affected the outcome?                                  | N/A | N/A |
| 2.5. [If applicable:] Was there non-adherence to the assigned intervention regimen that could have affected participants' outcomes?               | N/A | Y   |
| 2.6. <u>If N/PN/NI to 2.3, or Y/PY/NI to 2.4 or 2.5:</u> Was an appropriate analysis used to estimate the effect of adhering to the intervention? | N/A | N/A |
| Risk-of-bias judgement                                                                                                                            | N/A | N/A |
| Optional: What is the predicted direction of bias due to deviations from intended interventions?                                                  | N/A | N/A |

Domain 3: Missing outcome data

| Signalling questions                                                                                    | Comments | Response options |
|---------------------------------------------------------------------------------------------------------|----------|------------------|
| 3.1 Were data for this outcome available for all, or nearly all, participants randomized?               |          | Y                |
| 3.2 <u>If N/PN/NI to 3.1:</u> Is there evidence that the result was not biased by missing outcome data? | N/A      | N/A              |
| 3.3 <u>If N/PN to 3.2:</u> Could missingness in the outcome depend on its true value?                   | N/A      | N/A              |
| 3.4 <u>If Y/PY/NI to 3.3:</u> Is it likely that missingness in the outcome depended on its true value?  |          | N/A              |
| Risk-of-bias judgement                                                                                  |          | Low              |
| Optional: What is the predicted direction of bias due to missing outcome data?                          |          | NA               |

Domain 4: Risk of bias in measurement of the outcome

| Signalling questions                                                                                                            | Comments | Response options |
|---------------------------------------------------------------------------------------------------------------------------------|----------|------------------|
| 4.1 Was the method of measuring the outcome inappropriate?                                                                      |          | <u>N</u>         |
| 4.2 Could measurement or ascertainment of the outcome have differed between intervention groups?                                |          | <u>N</u>         |
| 4.3 If <u>N/PN/NI</u> to 4.1 and 4.2: Were outcome assessors aware of the intervention received by study participants?          |          | <u>PN</u>        |
| 4.4 If <u>Y/PY/NI</u> to 4.3: Could assessment of the outcome have been influenced by knowledge of intervention received?       |          | N/A              |
| 4.5 If <u>Y/PY/NI</u> to 4.4: Is it likely that assessment of the outcome was influenced by knowledge of intervention received? |          | N/A              |
| <b>Risk-of-bias judgement</b>                                                                                                   |          | Low              |
| Optional: What is the predicted direction of bias in measurement of the outcome?                                                |          | NA               |

Domain 5: Risk of bias in selection of the reported result

| Signalling questions                                                                                                                                                                | Comments | Response options |
|-------------------------------------------------------------------------------------------------------------------------------------------------------------------------------------|----------|------------------|
| 5.1 Were the data that produced this result analysed in accordance with a pre-specified analysis plan that was finalized before unblinded outcome data were available for analysis? |          | <u>PY</u>        |
| Is the numerical result being assessed likely to have been selected, on the basis of the results, from...                                                                           |          |                  |
| 5.2. ... multiple eligible outcome measurements (e.g. scales, definitions, time points) within the outcome domain?                                                                  |          | <u>N</u>         |
| 5.3 ... multiple eligible analyses of the data?                                                                                                                                     |          | <u>N</u>         |
| <b>Risk-of-bias judgement</b>                                                                                                                                                       |          | Low              |
| Optional: What is the predicted direction of bias due to selection of the reported result?                                                                                          |          | NA               |

Overall risk of bias

|                                                                             |  |     |
|-----------------------------------------------------------------------------|--|-----|
| <b>Risk-of-bias judgement</b>                                               |  | Low |
| Optional: What is the overall predicted direction of bias for this outcome? |  | NA  |

## Study details

### Reference

Eefting F, Nathoe H, van Dijk D, Jansen E, Lahpor J, Stella P, et al. Randomized Comparison Between Pump Bypass Surgery in Patients Referred for Angioplasty. *Circulation*. 2003 Dec 9;108(23):28

### Study design

- Individually-randomized parallel-group trial
- Cluster-randomized parallel-group trial
- Individually randomized cross-over (or other matched) trial

### For the purposes of this assessment, the interventions being compared are defined as

Experimental:  Comparator:

### Specify which outcome is being assessed for risk of bias

**Specify the numerical result being assessed.** In case of multiple alternative analyses being presented, specify the numeric result (e.g. RR = 1.52 (95% CI 0.83 to 2.77) and/or a reference (e.g. to a table, figure or paragraph) that uniquely defines the result being assessed.

### Is the review team's aim for this result...?

- to assess the effect of *assignment to intervention* (the 'intention-to-treat' effect)
- to assess the effect of *adhering to intervention* (the 'per-protocol' effect)

**If the aim is to assess the effect of *adhering to intervention***, select the deviations from intended intervention that should be addressed (at least one must be checked):

- occurrence of non-protocol interventions
- failures in implementing the intervention that could have affected the outcome
- non-adherence to their assigned intervention by trial participants

### Which of the following sources were obtained to help inform the risk-of-bias assessment? (tick as many as apply)

- Journal article(s) with results of the trial
- Trial protocol
- Statistical analysis plan (SAP)
- Non-commercial trial registry record (e.g. ClinicalTrials.gov record)
- Company-owned trial registry record (e.g. GSK Clinical Study Register record)
- "Grey literature" (e.g. unpublished thesis)
- Conference abstract(s) about the trial
- Regulatory document (e.g. Clinical Study Report, Drug Approval Package)
- Research ethics application
- Grant database summary (e.g. NIH RePORTER or Research Councils UK Gateway to Research)
- Personal communication with trialist
- Personal communication with the sponsor

Risk of bias assessment

Responses underlined in green are potential markers for low risk of bias, and responses in red are potential markers for a risk of bias. Where questions relate only to sign posts to other questions, no formatting is used.

Domain 1: Risk of bias arising from the randomization process

| Signalling questions                                                                                       | Comments | Response options |
|------------------------------------------------------------------------------------------------------------|----------|------------------|
| 1.1 Was the allocation sequence random?                                                                    |          | <u>Y</u>         |
| 1.2 Was the allocation sequence concealed until participants were enrolled and assigned to interventions?  |          | <u>Y</u>         |
| 1.3 Did baseline differences between intervention groups suggest a problem with the randomization process? |          | <u>N</u>         |
| Risk-of-bias judgement                                                                                     |          | Low              |
| Optional: What is the predicted direction of bias arising from the randomization process?                  |          | Unpredictable    |

Domain 2: Risk of bias due to deviations from the intended interventions (*effect of assignment to intervention*)

| Signalling questions                                                                                                                                                          | Comments | Response options |
|-------------------------------------------------------------------------------------------------------------------------------------------------------------------------------|----------|------------------|
| 2.1. Were participants aware of their assigned intervention during the trial?                                                                                                 |          | Y                |
| 2.2. Were carers and people delivering the interventions aware of participants' assigned intervention during the trial?                                                       |          | Y                |
| 2.3. If <u>Y/PY/NI</u> to 2.1 or 2.2: Were there deviations from the intended intervention that arose because of the trial context?                                           |          | Y                |
| 2.4 If <u>Y/PY</u> to 2.3: Were these deviations likely to have affected the outcome?                                                                                         |          | <u>PY</u>        |
| 2.5. If <u>Y/PY/NI</u> to 2.4: Were these deviations from intended intervention balanced between groups?                                                                      |          | <u>Y</u>         |
| 2.6 Was an appropriate analysis used to estimate the effect of assignment to intervention?                                                                                    |          | <u>Y</u>         |
| 2.7 If <u>N/PN/NI</u> to 2.6: Was there potential for a substantial impact (on the result) of the failure to analyse participants in the group to which they were randomized? |          | PY               |
| Risk-of-bias judgement                                                                                                                                                        |          | Some concerns    |
| Optional: What is the predicted direction of bias due to deviations from intended interventions?                                                                              |          | Unpredictable    |

Domain 2: Risk of bias due to deviations from the intended interventions (*effect of adhering to intervention*)

| Signalling questions                                                          | Comments | Response options |
|-------------------------------------------------------------------------------|----------|------------------|
| 2.1. Were participants aware of their assigned intervention during the trial? | N/A      | N/A              |

|                                                                                                                                                   |     |     |
|---------------------------------------------------------------------------------------------------------------------------------------------------|-----|-----|
| 2.2. Were carers and people delivering the interventions aware of participants' assigned intervention during the trial?                           |     | N/A |
| 2.3. [If applicable:] <u>If Y/PY/NI to 2.1 or 2.2:</u> Were important non-protocol interventions balanced across intervention groups?             | N/A | N/A |
| 2.4. [If applicable:] Were there failures in implementing the intervention that could have affected the outcome?                                  | N/A | N/A |
| 2.5. [If applicable:] Was there non-adherence to the assigned intervention regimen that could have affected participants' outcomes?               | N/A | Y   |
| 2.6. <u>If N/PN/NI to 2.3, or Y/PY/NI to 2.4 or 2.5:</u> Was an appropriate analysis used to estimate the effect of adhering to the intervention? | N/A | N/A |
| Risk-of-bias judgement                                                                                                                            | N/A | N/A |
| Optional: What is the predicted direction of bias due to deviations from intended interventions?                                                  | N/A | N/A |

Domain 3: Missing outcome data

| Signalling questions                                                                                    | Comments | Response options |
|---------------------------------------------------------------------------------------------------------|----------|------------------|
| 3.1 Were data for this outcome available for all, or nearly all, participants randomized?               |          | Y                |
| 3.2 <u>If N/PN/NI to 3.1:</u> Is there evidence that the result was not biased by missing outcome data? | N/A      | N/A              |
| 3.3 <u>If N/PN to 3.2:</u> Could missingness in the outcome depend on its true value?                   | N/A      | N/A              |
| 3.4 <u>If Y/PY/NI to 3.3:</u> Is it likely that missingness in the outcome depended on its true value?  |          | N/A              |
| Risk-of-bias judgement                                                                                  |          | Low              |
| Optional: What is the predicted direction of bias due to missing outcome data?                          |          | NA               |



Domain 4: Risk of bias in measurement of the outcome

| Signalling questions                                                                                                            | Comments | Response options |
|---------------------------------------------------------------------------------------------------------------------------------|----------|------------------|
| 4.1 Was the method of measuring the outcome inappropriate?                                                                      |          | <u>N</u>         |
| 4.2 Could measurement or ascertainment of the outcome have differed between intervention groups?                                |          | <u>N</u>         |
| 4.3 If <u>N/PN/NI</u> to 4.1 and 4.2: Were outcome assessors aware of the intervention received by study participants?          |          | <u>PN</u>        |
| 4.4 If <u>Y/PY/NI</u> to 4.3: Could assessment of the outcome have been influenced by knowledge of intervention received?       |          | N/A              |
| 4.5 If <u>Y/PY/NI</u> to 4.4: Is it likely that assessment of the outcome was influenced by knowledge of intervention received? |          | N/A              |
| <b>Risk-of-bias judgement</b>                                                                                                   |          | Low              |
| Optional: What is the predicted direction of bias in measurement of the outcome?                                                |          | NA               |

Domain 5: Risk of bias in selection of the reported result

| Signalling questions                                                                                                                                                                | Comments | Response options |
|-------------------------------------------------------------------------------------------------------------------------------------------------------------------------------------|----------|------------------|
| 5.1 Were the data that produced this result analysed in accordance with a pre-specified analysis plan that was finalized before unblinded outcome data were available for analysis? |          | <u>PY</u>        |
| Is the numerical result being assessed likely to have been selected, on the basis of the results, from...                                                                           |          |                  |
| 5.2. ... multiple eligible outcome measurements (e.g. scales, definitions, time points) within the outcome domain?                                                                  |          | <u>N</u>         |
| 5.3 ... multiple eligible analyses of the data?                                                                                                                                     |          | <u>N</u>         |
| <b>Risk-of-bias judgement</b>                                                                                                                                                       |          | Low              |
| Optional: What is the predicted direction of bias due to selection of the reported result?                                                                                          |          | NA               |

Overall risk of bias

|                                                                             |  |     |
|-----------------------------------------------------------------------------|--|-----|
| <b>Risk-of-bias judgement</b>                                               |  | Low |
| Optional: What is the overall predicted direction of bias for this outcome? |  | NA  |

## References

1. Serruys PW, Ong ATL, van Herwerden LA, Sousa JE, Jatene A, Bonnier JJRM, et al. Five-Year Outcomes After Coronary Stenting Versus Bypass Surgery for the Treatment of Multivessel Disease. *J Am Coll Cardiol*. 2005 Aug;46(4):575–81.
2. Park S-J, Ahn J-M, Kim Y-H, Park D-W, Yun S-C, Lee J-Y, et al. Trial of everolimus-eluting stents or bypass surgery for coronary disease. *N Engl J Med*. 2015 Mar 26;372(13):1204–12.
3. Blazek S, Holzhey D, Jungert C, Borger MA, Fuernau G, Desch S, et al. Comparison of Bare-Metal Stenting With Minimally Invasive Bypass Surgery for Stenosis of the Left Anterior Descending Coronary Artery. *JACC Cardiovasc Interv*. 2013 Jan;6(1):20–6.
4. Boudriot E, Thiele H, Walther T, Liebetrau C, Boeckstegers P, Pohl T, et al. Randomized Comparison of Percutaneous Coronary Intervention With Sirolimus-Eluting Stents Versus Coronary Artery Bypass Grafting in Unprotected Left Main Stem Stenosis. *J Am Coll Cardiol*. 2011 Feb;57(5):538–45.
5. Kapur A, Hall RJ, Malik IS, Qureshi AC, Butts J, de Belder M, et al. Randomized Comparison of Percutaneous Coronary Intervention With Coronary Artery Bypass Grafting in Diabetic Patients. *J Am Coll Cardiol*. 2010 Feb;55(5):432–40.
6. Cisowski M, Drzewiecki J, Drzewiecka-Gerber A, Jaklik A, Kruczak W, Szczeklik M, et al. Primary stenting versus MIDCAB: preliminary report—Comparison of two methods of revascularization in single left anterior descending coronary artery stenosis. *Ann Thorac Surg*. 2002 Oct;74(4):1334–9.
7. Drenth DJ, Veeger NJGM, Middel B, Zijlstra F, Boonstra PW. Comparison of late (four years) functional health status between percutaneous transluminal angioplasty intervention and off-pump left internal mammary artery bypass grafting for isolated high-grade narrowing of the proximal left anterior descending coronary artery. *Am J Cardiol*. 2004 Dec;94(11):1414–7.
8. Rodriguez AE, Baldi J, Fernández Pereira C, Navia J, Rodriguez Alemparte M, Delacasa A, et al. Five-year follow-up of the Argentine randomized trial of coronary angioplasty with stenting versus coronary bypass surgery in patients with multiple vessel disease (ERACI II). *J Am Coll Cardiol*. 2005 Aug 16;46(4):582–8.
9. Stone GW, Kappetein AP, Sabik JF, Pocock SJ, Morice M-C, Puskas J, et al. Five-Year Outcomes after PCI or CABG for Left Main Coronary Disease. *N Engl J Med*. 2019 Sep 28;0(0):null.
10. Farkouh ME, Domanski M, Sleeper LA, Siami FS, Dangas G, Mack M, et al. Strategies for Multivessel Revascularization in Patients with Diabetes. *N Engl J Med*. 2012 Dec 20;367(25):2375–84.
11. Hong SJ, Lim D-S, Seo HS, Kim Y-H, Shim WJ, Park CG, et al. Percutaneous coronary intervention with drug-eluting stent implantation vs. minimally invasive direct coronary artery bypass (MIDCAB) in patients with left anterior descending coronary artery stenosis. *Catheter Cardiovasc Interv*. 2005 Jan;64(1):75–81.
12. Kim JW, Lim DS, Sun K, Shim WJ, Rho YM. Stenting or MIDCAB using ministernotomy for revascularization of proximal left anterior descending artery? *Int J Cardiol*. 2005 Mar;99(3):437–41.
13. Buszman PE, Buszman PP, Banasiewicz-Szkróbka I, Milewski KP, Żurakowski A, Orlik B, et al. Left Main Stenting in Comparison With Surgical Revascularization. *JACC Cardiovasc Interv*. 2016 Feb;9(4):318–27.
14. Hueb W, Lopes N, Gersh BJ, Soares PR, Ribeiro EE, Pereira AC, et al. Ten-year follow-up survival of the Medicine, Angioplasty, or Surgery Study (MASS II): a randomized controlled clinical trial of 3 therapeutic strategies for multivessel coronary artery disease. *Circulation*. 2010 Sep 7;122(10):949–57.

15. Pohl T, Giehl W, Reichart B, Kupatt C, Raake P, Paul S, et al. Retroinfusion-supported stenting in high-risk patients for percutaneous intervention and bypass surgery: Results of the prospective randomized myoprotect I study. *Catheter Cardiovasc Interv*. 2004 Jul;62(3):323–30.
16. Holm NR, Mäkikallio T, Lindsay MM, Spence MS, Erglis A, Menown IBA, et al. Percutaneous coronary angioplasty versus coronary artery bypass grafting in the treatment of unprotected left main stenosis: updated 5-year outcomes from the randomised, non-inferiority NOBLE trial. *The Lancet* [Internet]. 2019 Dec 23 [cited 2020 Jan 14];0(0). Available from: [https://www.thelancet.com/journals/lancet/article/PIIS0140-6736\(19\)32972-1/abstract](https://www.thelancet.com/journals/lancet/article/PIIS0140-6736(19)32972-1/abstract)
17. Eefting F, Nathoe H, van Dijk D, Jansen E, Lahpor J, Stella P, et al. Randomized Comparison Between Stenting and Off-Pump Bypass Surgery in Patients Referred for Angioplasty. *Circulation*. 2003 Dec 9;108(23):2870–6.
18. Ahn J-M, Roh J-H, Kim Y-H, Park D-W, Yun S-C, Lee PH, et al. Randomized Trial of Stents Versus Bypass Surgery for Left Main Coronary Artery Disease: 5-Year Outcomes of the PRECOMBAT Study. *J Am Coll Cardiol*. 2015 May 26;65(20):2198–206.
19. SoS Investigators. Coronary artery bypass surgery versus percutaneous coronary intervention with stent implantation in patients with multivessel coronary artery disease (the Stent or Surgery trial): a randomised controlled trial. *Lancet Lond Engl*. 2002 Sep 28;360(9338):965–70.
20. Goy J-J, Kaufmann U, Hurni M, Cook S, Versaci F, Ruchat P, et al. 10-year follow-up of a prospective randomized trial comparing bare-metal stenting with internal mammary artery grafting for proximal, isolated de novo left anterior coronary artery stenosis the SIMA (Stenting versus Internal Mammary Artery grafting) trial. *J Am Coll Cardiol*. 2008 Sep 2;52(10):815–7.
21. Mohr FW, Morice M-C, Kappetein AP, Feldman TE, Ståhle E, Colombo A, et al. Coronary artery bypass graft surgery versus percutaneous coronary intervention in patients with three-vessel disease and left main coronary disease: 5-year follow-up of the randomised, clinical SYNTAX trial. *The Lancet*. 2013 Feb;381(9867):629–38.
22. Thuijs DJFM, Kappetein AP, Serruys PW, Mohr F-W, Morice M-C, Mack MJ, et al. Percutaneous coronary intervention versus coronary artery bypass grafting in patients with three-vessel or left main coronary artery disease: 10-year follow-up of the multicentre randomised controlled SYNTAX trial. *Lancet Lond Engl*. 2019 12;394(10206):1325–34.
23. Thiele H, Neumann-Schriedewind P, Jacobs S, Boudriot E, Walther T, Mohr F-W, et al. Randomized Comparison of Minimally Invasive Direct Coronary Artery Bypass Surgery Versus Sirolimus-Eluting Stenting in Isolated Proximal Left Anterior Descending Coronary Artery Stenosis. *J Am Coll Cardiol*. 2009 Jun;53(25):2324–31.
24. Kamalesh M, Sharp TG, Tang XC, Shunk K, Ward HB, Walsh J, et al. Percutaneous coronary intervention versus coronary bypass surgery in United States veterans with diabetes. *J Am Coll Cardiol*. 2013 Feb 26;61(8):808–16.
